# Supplementary material for: Sex-specific exploration accounts for differences in valence learning in male and female mice
Source: eLife. 2025 Dec 12;14:e108498. doi: 10.7554/eLife.108498 (PMC12829990; doi:10.7554/eLife.108498)
Supplement: Supplementary file 1. — (A) Linear mixed-effects regression (LMER) on food-port-related metrics. (B) LMER on freezing with different thresholds. (C) Syllable identities and description. (D) Jackknifing statistics for regression coefficients for PLS models. (E) LMER comparing predicted values from PLS model on recall day to assess cue discrimination. (F) LMER on Pre-Cue exploring including habituation day. (G) LMER on Pre-Cue pausing and exploring. (H) LMER on pausing in early and late cue by day, sex and paradigm with contrasts for pre-cue, CS−, and CSS. (I) LMER on reward predictive behaviors. [file elife-108498-supp1.xlsx]

## Sheet: 1a
HEs Day contrasts											Time in port Day contrasts											Licks Day contrasts											Latency Day contrasts
contrast	Session	Sex	Protocol	estimate	SE	df	z.ratio	p.value			contrast	Session	Sex	Protocol	estimate	SE	df	z.ratio	p.value			contrast	Session	Sex	Protocol	estimate	SE	df	z.ratio	p.value			contrast	Session	Sex	Protocol	estimate	SE	df	z.ratio	p.value
(CS-) - CSR	1	Female	Mixed	-0.0702703	0.115045	Inf	-0.610808	0.814214			(CS-) - CSR	1	Female	Mixed	-0.0507568	0.168066	Inf	-0.302006	0.950967			(CS-) - CSR	1	Female	Mixed	-0.383784	0.848972	Inf	-0.452057	0.893491			(CS-) - CSR	1	Female	Mixed	0.986405	0.501084	Inf	1.96854	0.120049
(CS-) - CSS	1	Female	Mixed	0.0972973	0.115045	Inf	0.845734	0.674519			(CS-) - CSS	1	Female	Mixed	0.052973	0.168066	Inf	0.315192	0.946711			(CS-) - CSS	1	Female	Mixed	-0.454054	0.848972	Inf	-0.534828	0.854185			(CS-) - CSS	1	Female	Mixed	0.309189	0.501084	Inf	0.617041	0.810792
CSR - CSS	1	Female	Mixed	0.167568	0.115045	Inf	1.45654	0.312064			CSR - CSS	1	Female	Mixed	0.10373	0.168066	Inf	0.617198	0.810705			CSR - CSS	1	Female	Mixed	-0.0702703	0.848972	Inf	-0.082771	0.99623			CSR - CSS	1	Female	Mixed	-0.677216	0.501084	Inf	-1.3515	0.366691
(CS-) - CSR	2	Female	Mixed	-0.0540541	0.115045	Inf	-0.469852	0.638461			(CS-) - CSR	2	Female	Mixed	-0.181243	0.168066	Inf	-1.07841	0.280852			(CS-) - CSR	2	Female	Mixed	-1.4027	0.848972	Inf	-1.65224	0.0984863			(CS-) - CSR	2	Female	Mixed	0.524514	0.501084	Inf	1.04676	0.295211
(CS-) - CSR	3	Female	Mixed	-0.0027027	0.115045	Inf	-0.0234926	0.981257			(CS-) - CSR	3	Female	Mixed	-0.029	0.168066	Inf	-0.172552	0.863004			(CS-) - CSR	3	Female	Mixed	-0.597297	0.848972	Inf	-0.703554	0.481711			(CS-) - CSR	3	Female	Mixed	0.238216	0.501084	Inf	0.475402	0.634501
(CS-) - CSR	4	Female	Mixed	-0.0513514	0.115045	Inf	-0.446359	0.896014			(CS-) - CSR	4	Female	Mixed	-0.0908108	0.168066	Inf	-0.540329	0.851407			(CS-) - CSR	4	Female	Mixed	-1.10811	0.848972	Inf	-1.30524	0.392211			(CS-) - CSR	4	Female	Mixed	0.0632432	0.501084	Inf	0.126213	0.991256
(CS-) - CSS	4	Female	Mixed	0.356757	0.115045	Inf	3.10102	0.00547588			(CS-) - CSS	4	Female	Mixed	0.434595	0.168066	Inf	2.58586	0.02628			(CS-) - CSS	4	Female	Mixed	1.91351	0.848972	Inf	2.25392	0.062492			(CS-) - CSS	4	Female	Mixed	-2.67022	0.501084	Inf	-5.32888	2.96004e-07
CSR - CSS	4	Female	Mixed	0.408108	0.115045	Inf	3.54738	0.00113256			CSR - CSS	4	Female	Mixed	0.525405	0.168066	Inf	3.12619	0.00503705			CSR - CSS	4	Female	Mixed	3.02162	0.848972	Inf	3.55915	0.00108354			CSR - CSS	4	Female	Mixed	-2.73346	0.501084	Inf	-5.45509	1.46665e-07
(CS-) - CSR	5	Female	Mixed	-0.0702703	0.115045	Inf	-0.610808	0.541327			(CS-) - CSR	5	Female	Mixed	-0.0577297	0.168066	Inf	-0.343495	0.731226			(CS-) - CSR	5	Female	Mixed	-0.535135	0.848972	Inf	-0.630333	0.528477			(CS-) - CSR	5	Female	Mixed	0.126892	0.501084	Inf	0.253235	0.800087
(CS-) - CSR	6	Female	Mixed	-0.0351351	0.115045	Inf	-0.305404	0.760059			(CS-) - CSR	6	Female	Mixed	-0.106946	0.168066	Inf	-0.636334	0.524559			(CS-) - CSR	6	Female	Mixed	1.4973	0.848972	Inf	1.76366	0.0777894			(CS-) - CSR	6	Female	Mixed	0.577568	0.501084	Inf	1.15264	0.24906
(CS-) - CSR	7	Female	Mixed	-0.027027	0.115045	Inf	-0.234926	0.970034			(CS-) - CSR	7	Female	Mixed	0.0765135	0.168066	Inf	0.45526	0.892062			(CS-) - CSR	7	Female	Mixed	-1.51622	0.848972	Inf	-1.78594	0.174271			(CS-) - CSR	7	Female	Mixed	0.457081	0.501084	Inf	0.912184	0.632578
(CS-) - CSS	7	Female	Mixed	0.610971	0.118565	Inf	5.15306	7.67135e-07			(CS-) - CSS	7	Female	Mixed	0.940663	0.17321	Inf	5.43077	1.68118e-07			(CS-) - CSS	7	Female	Mixed	3.88127	0.874956	Inf	4.43596	2.72872e-05			(CS-) - CSS	7	Female	Mixed	-3.2949	0.51642	Inf	-6.38028	5.30244e-10
CSR - CSS	7	Female	Mixed	0.637998	0.118565	Inf	5.38101	2.21891e-07			CSR - CSS	7	Female	Mixed	0.864149	0.17321	Inf	4.98903	1.81512e-06			CSR - CSS	7	Female	Mixed	5.39749	0.874956	Inf	6.16887	2.06289e-09			CSR - CSS	7	Female	Mixed	-3.75198	0.51642	Inf	-7.26537	1.13753e-12
(CS-) - CSR	8	Female	Mixed	0.0675676	0.115045	Inf	0.587315	0.556992			(CS-) - CSR	8	Female	Mixed	0.0227568	0.168066	Inf	0.135404	0.892292			(CS-) - CSR	8	Female	Mixed	-1	0.848972	Inf	-1.1779	0.238838			(CS-) - CSR	8	Female	Mixed	-0.491541	0.501084	Inf	-0.980954	0.326615
(CS-) - CSR	9	Female	Mixed	0.116216	0.115045	Inf	1.01018	0.312408			(CS-) - CSR	9	Female	Mixed	0.034973	0.168066	Inf	0.208091	0.835158			(CS-) - CSR	9	Female	Mixed	0.137838	0.848972	Inf	0.162359	0.871024			(CS-) - CSR	9	Female	Mixed	-0.0498108	0.501084	Inf	-0.0994061	0.920816
(CS-) - CSR	10	Female	Mixed	-0.0837838	0.115045	Inf	-0.728271	0.746703			(CS-) - CSR	10	Female	Mixed	-0.0433243	0.168066	Inf	-0.257782	0.964031			(CS-) - CSR	10	Female	Mixed	-1.29189	0.848972	Inf	-1.52171	0.280664			(CS-) - CSR	10	Female	Mixed	0.527811	0.501084	Inf	1.05334	0.54319
(CS-) - CSS	10	Female	Mixed	0.454054	0.115045	Inf	3.94676	0.000233689			(CS-) - CSS	10	Female	Mixed	0.834162	0.168066	Inf	4.96331	2.07265e-06			(CS-) - CSS	10	Female	Mixed	2.90811	0.848972	Inf	3.42545	0.00177675			(CS-) - CSS	10	Female	Mixed	-3.18459	0.501084	Inf	-6.35541	6.23528e-10
CSR - CSS	10	Female	Mixed	0.537838	0.115045	Inf	4.67503	8.77217e-06			CSR - CSS	10	Female	Mixed	0.877486	0.168066	Inf	5.22109	5.32593e-07			CSR - CSS	10	Female	Mixed	4.2	0.848972	Inf	4.94716	2.25198e-06			CSR - CSS	10	Female	Mixed	-3.71241	0.501084	Inf	-7.40875	4.02678e-13
(CS-) - CSR	11	Female	Mixed	-0.151351	0.115045	Inf	-1.31559	0.188313			(CS-) - CSR	11	Female	Mixed	-0.0555405	0.168066	Inf	-0.330469	0.741045			(CS-) - CSR	11	Female	Mixed	0.421622	0.848972	Inf	0.496626	0.619453			(CS-) - CSR	11	Female	Mixed	0.605351	0.501084	Inf	1.20808	0.227015
(CS-) - CSR	12	Female	Mixed	-0.218919	0.115045	Inf	-1.9029	0.0570535			(CS-) - CSR	12	Female	Mixed	-0.0334324	0.168066	Inf	-0.198925	0.842322			(CS-) - CSR	12	Female	Mixed	-1.02162	0.848972	Inf	-1.20336	0.228836			(CS-) - CSR	12	Female	Mixed	0.554189	0.501084	Inf	1.10598	0.268735
(CS-) - CSR	13	Female	Mixed	-0.637838	0.115045	Inf	-5.54425	8.8473e-08			(CS-) - CSR	13	Female	Mixed	-0.385757	0.168066	Inf	-2.29527	0.05645			(CS-) - CSR	13	Female	Mixed	-1.18378	0.848972	Inf	-1.39437	0.343819			(CS-) - CSR	13	Female	Mixed	1.44524	0.501084	Inf	2.88423	0.01095
(CS-) - CSS	13	Female	Mixed	0.47027	0.115045	Inf	4.08771	0.000128938			(CS-) - CSS	13	Female	Mixed	0.933297	0.168066	Inf	5.55317	8.40762e-08			(CS-) - CSS	13	Female	Mixed	4.36216	0.848972	Inf	5.13817	8.3043e-07			(CS-) - CSS	13	Female	Mixed	-3.49032	0.501084	Inf	-6.96555	9.83691e-12
CSR - CSS	13	Female	Mixed	1.10811	0.115045	Inf	9.63197	2.20934e-14			CSR - CSS	13	Female	Mixed	1.31905	0.168066	Inf	7.84845	5.71765e-14			CSR - CSS	13	Female	Mixed	5.54595	0.848972	Inf	6.53254	1.93989e-10			CSR - CSS	13	Female	Mixed	-4.93557	0.501084	Inf	-9.84978	2.90878e-14
(CS-) - CSR	14	Female	Mixed	-0.391892	0.115045	Inf	-3.40643	0.00065819			(CS-) - CSR	14	Female	Mixed	-0.560919	0.168066	Inf	-3.3375	0.000845361			(CS-) - CSR	14	Female	Mixed	-2.66486	0.848972	Inf	-3.13893	0.00169565			(CS-) - CSR	14	Female	Mixed	0.888432	0.501084	Inf	1.77302	0.0762253
(CS-) - CSR	15	Female	Mixed	-0.297297	0.115045	Inf	-2.58419	0.0264027			(CS-) - CSR	15	Female	Mixed	-0.233946	0.168066	Inf	-1.39199	0.34507			(CS-) - CSR	15	Female	Mixed	-0.897297	0.848972	Inf	-1.05692	0.54094			(CS-) - CSR	15	Female	Mixed	0.123514	0.501084	Inf	0.246493	0.967061
(CS-) - CSS	15	Female	Mixed	0.443243	0.115045	Inf	3.85279	0.000343623			(CS-) - CSS	15	Female	Mixed	0.410486	0.168066	Inf	2.44242	0.0387505			(CS-) - CSS	15	Female	Mixed	1.3027	0.848972	Inf	1.53445	0.274762			(CS-) - CSS	15	Female	Mixed	-3.2407	0.501084	Inf	-6.46738	2.99127e-10
CSR - CSS	15	Female	Mixed	0.740541	0.115045	Inf	6.43697	3.65607e-10			CSR - CSS	15	Female	Mixed	0.644432	0.168066	Inf	3.83441	0.000370158			CSR - CSS	15	Female	Mixed	2.2	0.848972	Inf	2.59137	0.0258802			CSR - CSS	15	Female	Mixed	-3.36422	0.501084	Inf	-6.71388	5.68767e-11
(CS-) - CSR	1	Male	Mixed	-0.0297297	0.115045	Inf	-0.258419	0.963857			(CS-) - CSR	1	Male	Mixed	-0.176595	0.168066	Inf	-1.05075	0.544817			(CS-) - CSR	1	Male	Mixed	-0.456757	0.848972	Inf	-0.538012	0.85258			(CS-) - CSR	1	Male	Mixed	0.557054	0.501084	Inf	1.1117	0.50681
(CS-) - CSS	1	Male	Mixed	0.0648649	0.115045	Inf	0.563822	0.839333			(CS-) - CSS	1	Male	Mixed	-0.0977297	0.168066	Inf	-0.581497	0.83003			(CS-) - CSS	1	Male	Mixed	-0.0324324	0.848972	Inf	-0.038202	0.999196			(CS-) - CSS	1	Male	Mixed	0.163459	0.501084	Inf	0.326212	0.943031
CSR - CSS	1	Male	Mixed	0.0945946	0.115045	Inf	0.822241	0.689206			CSR - CSS	1	Male	Mixed	0.0788649	0.168066	Inf	0.46925	0.885729			CSR - CSS	1	Male	Mixed	0.424324	0.848972	Inf	0.49981	0.8714			CSR - CSS	1	Male	Mixed	-0.393595	0.501084	Inf	-0.785486	0.711967
(CS-) - CSR	2	Male	Mixed	-0.213514	0.115045	Inf	-1.85592	0.0634656			(CS-) - CSR	2	Male	Mixed	-0.398622	0.168066	Inf	-2.37182	0.0177007			(CS-) - CSR	2	Male	Mixed	-2.37297	0.848972	Inf	-2.79511	0.00518816			(CS-) - CSR	2	Male	Mixed	0.934838	0.501084	Inf	1.86563	0.0620931
(CS-) - CSR	3	Male	Mixed	-0.154054	0.115045	Inf	-1.33908	0.180545			(CS-) - CSR	3	Male	Mixed	-0.344324	0.168066	Inf	-2.04875	0.0404867			(CS-) - CSR	3	Male	Mixed	-1.80541	0.848972	Inf	-2.12658	0.0334552			(CS-) - CSR	3	Male	Mixed	1.03103	0.501084	Inf	2.05759	0.0396292
(CS-) - CSR	4	Male	Mixed	0.0621622	0.115045	Inf	0.54033	0.851407			(CS-) - CSR	4	Male	Mixed	-0.0601081	0.168066	Inf	-0.357647	0.931926			(CS-) - CSR	4	Male	Mixed	-0.283784	0.848972	Inf	-0.334268	0.94027			(CS-) - CSR	4	Male	Mixed	-0.300541	0.501084	Inf	-0.599781	0.82022
(CS-) - CSS	4	Male	Mixed	0.535135	0.115045	Inf	4.65154	9.83137e-06			(CS-) - CSS	4	Male	Mixed	0.721405	0.168066	Inf	4.2924	5.25095e-05			(CS-) - CSS	4	Male	Mixed	3.61622	0.848972	Inf	4.25952	6.0829e-05			(CS-) - CSS	4	Male	Mixed	-3.23686	0.501084	Inf	-6.45972	3.14663e-10
CSR - CSS	4	Male	Mixed	0.472973	0.115045	Inf	4.11121	0.00011655			CSR - CSS	4	Male	Mixed	0.781514	0.168066	Inf	4.65005	9.90236e-06			CSR - CSS	4	Male	Mixed	3.9	0.848972	Inf	4.59379	1.2981e-05			CSR - CSS	4	Male	Mixed	-2.93632	0.501084	Inf	-5.85994	1.38834e-08
(CS-) - CSR	5	Male	Mixed	0.0783784	0.115045	Inf	0.681285	0.495691			(CS-) - CSR	5	Male	Mixed	0.175622	0.168066	Inf	1.04496	0.296042			(CS-) - CSR	5	Male	Mixed	0.708108	0.848972	Inf	0.834077	0.404238			(CS-) - CSR	5	Male	Mixed	-0.146351	0.501084	Inf	-0.292069	0.770234
(CS-) - CSR	6	Male	Mixed	-0.0351351	0.115045	Inf	-0.305404	0.760059			(CS-) - CSR	6	Male	Mixed	0.0233784	0.168066	Inf	0.139103	0.889369			(CS-) - CSR	6	Male	Mixed	0.291892	0.848972	Inf	0.343818	0.730983			(CS-) - CSR	6	Male	Mixed	0.0153243	0.501084	Inf	0.0305823	0.975603
(CS-) - CSR	7	Male	Mixed	-0.0351351	0.115045	Inf	-0.305404	0.949886			(CS-) - CSR	7	Male	Mixed	0.105405	0.168066	Inf	0.627168	0.805187			(CS-) - CSR	7	Male	Mixed	0.456757	0.848972	Inf	0.538012	0.85258			(CS-) - CSR	7	Male	Mixed	0.536892	0.501084	Inf	1.07146	0.531832
(CS-) - CSS	7	Male	Mixed	0.410512	0.118565	Inf	3.46235	0.00155281			(CS-) - CSS	7	Male	Mixed	0.684519	0.17321	Inf	3.95197	0.00022869			(CS-) - CSS	7	Male	Mixed	2.96554	0.874956	Inf	3.38936	0.00202423			(CS-) - CSS	7	Male	Mixed	-2.64243	0.51642	Inf	-5.11683	9.29989e-07
CSR - CSS	7	Male	Mixed	0.445647	0.118565	Inf	3.75869	0.000501142			CSR - CSS	7	Male	Mixed	0.579113	0.17321	Inf	3.34342	0.00238532			CSR - CSS	7	Male	Mixed	2.50879	0.874956	Inf	2.86733	0.0115348			CSR - CSS	7	Male	Mixed	-3.17932	0.51642	Inf	-6.15647	2.23091e-09
(CS-) - CSR	8	Male	Mixed	-0.0918919	0.115045	Inf	-0.798749	0.424436			(CS-) - CSR	8	Male	Mixed	-0.210135	0.168066	Inf	-1.25032	0.211184			(CS-) - CSR	8	Male	Mixed	-0.964865	0.848972	Inf	-1.13651	0.255743			(CS-) - CSR	8	Male	Mixed	0.385784	0.501084	Inf	0.769898	0.44136
(CS-) - CSR	9	Male	Mixed	0.0297297	0.115045	Inf	0.258419	0.796084			(CS-) - CSR	9	Male	Mixed	0.0193784	0.168066	Inf	0.115302	0.908205			(CS-) - CSR	9	Male	Mixed	0.391892	0.848972	Inf	0.461608	0.644363			(CS-) - CSR	9	Male	Mixed	-0.374838	0.501084	Inf	-0.748054	0.454428
(CS-) - CSR	10	Male	Mixed	0.0783784	0.115045	Inf	0.681285	0.774413			(CS-) - CSR	10	Male	Mixed	0.167892	0.168066	Inf	0.998966	0.577502			(CS-) - CSR	10	Male	Mixed	0.332432	0.848972	Inf	0.391571	0.918966			(CS-) - CSR	10	Male	Mixed	-0.532135	0.501084	Inf	-1.06197	0.537775
(CS-) - CSS	10	Male	Mixed	0.427027	0.115045	Inf	3.71183	0.000602756			(CS-) - CSS	10	Male	Mixed	0.733622	0.168066	Inf	4.36509	3.77918e-05			(CS-) - CSS	10	Male	Mixed	2.97297	0.848972	Inf	3.50185	0.00134228			(CS-) - CSS	10	Male	Mixed	-2.84357	0.501084	Inf	-5.67483	4.16153e-08
CSR - CSS	10	Male	Mixed	0.348649	0.115045	Inf	3.03055	0.00689546			CSR - CSS	10	Male	Mixed	0.56573	0.168066	Inf	3.36612	0.00220007			CSR - CSS	10	Male	Mixed	2.64054	0.848972	Inf	3.11028	0.00531061			CSR - CSS	10	Male	Mixed	-2.31143	0.501084	Inf	-4.61286	1.18468e-05
(CS-) - CSR	11	Male	Mixed	-0.0378378	0.115045	Inf	-0.328896	0.742234			(CS-) - CSR	11	Male	Mixed	-0.0637297	0.168066	Inf	-0.379195	0.704543			(CS-) - CSR	11	Male	Mixed	-0.859459	0.848972	Inf	-1.01235	0.311369			(CS-) - CSR	11	Male	Mixed	0.213108	0.501084	Inf	0.425294	0.670622
(CS-) - CSR	12	Male	Mixed	-0.0945946	0.115045	Inf	-0.822241	0.41094			(CS-) - CSR	12	Male	Mixed	-0.256838	0.168066	Inf	-1.5282	0.126463			(CS-) - CSR	12	Male	Mixed	-1.18649	0.848972	Inf	-1.39756	0.162246			(CS-) - CSR	12	Male	Mixed	0.515135	0.501084	Inf	1.02804	0.30393
(CS-) - CSR	13	Male	Mixed	-0.0810811	0.115045	Inf	-0.704778	0.760662			(CS-) - CSR	13	Male	Mixed	-0.150378	0.168066	Inf	-0.89476	0.643617			(CS-) - CSR	13	Male	Mixed	-0.92973	0.848972	Inf	-1.09512	0.517081			(CS-) - CSR	13	Male	Mixed	0.278297	0.501084	Inf	0.55539	0.843706
(CS-) - CSS	13	Male	Mixed	0.491892	0.115045	Inf	4.27565	5.6602e-05			(CS-) - CSS	13	Male	Mixed	0.870432	0.168066	Inf	5.17912	6.6742e-07			(CS-) - CSS	13	Male	Mixed	2.88649	0.848972	Inf	3.39998	0.00194831			(CS-) - CSS	13	Male	Mixed	-3.62184	0.501084	Inf	-7.228	1.49225e-12
CSR - CSS	13	Male	Mixed	0.572973	0.115045	Inf	4.98043	1.8976e-06			CSR - CSS	13	Male	Mixed	1.02081	0.168066	Inf	6.07388	3.74441e-09			CSR - CSS	13	Male	Mixed	3.81622	0.848972	Inf	4.4951	2.07156e-05			CSR - CSS	13	Male	Mixed	-3.90014	0.501084	Inf	-7.78339	3.86358e-14
(CS-) - CSR	14	Male	Mixed	-0.186486	0.115045	Inf	-1.62099	0.10502			(CS-) - CSR	14	Male	Mixed	-0.276081	0.168066	Inf	-1.6427	0.100445			(CS-) - CSR	14	Male	Mixed	-1.58649	0.848972	Inf	-1.86871	0.0616625			(CS-) - CSR	14	Male	Mixed	0.695865	0.501084	Inf	1.38872	0.164918
(CS-) - CSR	15	Male	Mixed	-0.140541	0.115045	Inf	-1.22162	0.440332			(CS-) - CSR	15	Male	Mixed	-0.215081	0.168066	Inf	-1.27974	0.40662			(CS-) - CSR	15	Male	Mixed	-0.783784	0.848972	Inf	-0.923215	0.625581			(CS-) - CSR	15	Male	Mixed	0.574216	0.501084	Inf	1.14595	0.485767
(CS-) - CSS	15	Male	Mixed	0.324324	0.115045	Inf	2.81911	0.0133588			(CS-) - CSS	15	Male	Mixed	0.454811	0.168066	Inf	2.70615	0.0186684			(CS-) - CSS	15	Male	Mixed	0.962162	0.848972	Inf	1.13333	0.493491			(CS-) - CSS	15	Male	Mixed	-2.78492	0.501084	Inf	-5.55779	8.18839e-08
CSR - CSS	15	Male	Mixed	0.464865	0.115045	Inf	4.04073	0.000157547			CSR - CSS	15	Male	Mixed	0.669892	0.168066	Inf	3.98589	0.000198511			CSR - CSS	15	Male	Mixed	1.74595	0.848972	Inf	2.05654	0.0990579			CSR - CSS	15	Male	Mixed	-3.35914	0.501084	Inf	-6.70374	6.09673e-11
(CS-) - CSR	1	Female	Appetitive	-0.3125	0.247413	Inf	-1.26307	0.206564			(CS-) - CSR	1	Female	Appetitive	-0.318125	0.361439	Inf	-0.880163	0.378771			(CS-) - CSR	1	Female	Appetitive	-3.3875	1.82578	Inf	-1.85537	0.0635437			(CS-) - CSR	1	Female	Appetitive	2.14388	1.07762	Inf	1.98945	0.0466516
(CS-) - CSR	2	Female	Appetitive	-0.3375	0.247413	Inf	-1.36411	0.172532			(CS-) - CSR	2	Female	Appetitive	-0.166875	0.361439	Inf	-0.461696	0.644299			(CS-) - CSR	2	Female	Appetitive	-0.625	1.82578	Inf	-0.342319	0.732111			(CS-) - CSR	2	Female	Appetitive	0.659875	1.07762	Inf	0.612344	0.54031
(CS-) - CSR	3	Female	Appetitive	0.0125	0.247413	Inf	0.0505228	0.959706			(CS-) - CSR	3	Female	Appetitive	0.053875	0.361439	Inf	0.149057	0.881509			(CS-) - CSR	3	Female	Appetitive	-0.5875	1.82578	Inf	-0.32178	0.74762			(CS-) - CSR	3	Female	Appetitive	-0.68275	1.07762	Inf	-0.633571	0.526361
(CS-) - CSR	4	Female	Appetitive	0.2375	0.247413	Inf	0.959932	0.337089			(CS-) - CSR	4	Female	Appetitive	0.041875	0.361439	Inf	0.115856	0.907766			(CS-) - CSR	4	Female	Appetitive	0.575	1.82578	Inf	0.314933	0.752812			(CS-) - CSR	4	Female	Appetitive	-1.33263	1.07762	Inf	-1.23663	0.216223
(CS-) - CSR	5	Female	Appetitive	0.0125	0.247413	Inf	0.0505228	0.959706			(CS-) - CSR	5	Female	Appetitive	-0.13575	0.361439	Inf	-0.375582	0.707228			(CS-) - CSR	5	Female	Appetitive	-0.1625	1.82578	Inf	-0.0890029	0.92908			(CS-) - CSR	5	Female	Appetitive	0.059125	1.07762	Inf	0.0548662	0.956245
(CS-) - CSR	6	Female	Appetitive	0.1625	0.247413	Inf	0.656796	0.511312			(CS-) - CSR	6	Female	Appetitive	0.24325	0.361439	Inf	0.673005	0.500944			(CS-) - CSR	6	Female	Appetitive	0.3625	1.82578	Inf	0.198545	0.842619			(CS-) - CSR	6	Female	Appetitive	-0.9225	1.07762	Inf	-0.856051	0.391969
(CS-) - CSR	7	Female	Appetitive	-0.0625	0.247413	Inf	-0.252614	0.800567			(CS-) - CSR	7	Female	Appetitive	0.04325	0.361439	Inf	0.119661	0.904752			(CS-) - CSR	7	Female	Appetitive	-1.8	1.82578	Inf	-0.985878	0.324193			(CS-) - CSR	7	Female	Appetitive	0.534625	1.07762	Inf	0.496115	0.619813
(CS-) - CSR	8	Female	Appetitive	0.225	0.247413	Inf	0.90941	0.363134			(CS-) - CSR	8	Female	Appetitive	0.091125	0.361439	Inf	0.252117	0.80095			(CS-) - CSR	8	Female	Appetitive	0.725	1.82578	Inf	0.39709	0.691301			(CS-) - CSR	8	Female	Appetitive	-0.05575	1.07762	Inf	-0.0517343	0.95874
(CS-) - CSR	9	Female	Appetitive	-0.125	0.247413	Inf	-0.505228	0.613399			(CS-) - CSR	9	Female	Appetitive	0.004125	0.361439	Inf	0.0114127	0.990894			(CS-) - CSR	9	Female	Appetitive	-1.3625	1.82578	Inf	-0.746255	0.455513			(CS-) - CSR	9	Female	Appetitive	0.62025	1.07762	Inf	0.575573	0.564904
(CS-) - CSR	10	Female	Appetitive	-0.2875	0.247413	Inf	-1.16202	0.245226			(CS-) - CSR	10	Female	Appetitive	-0.037625	0.361439	Inf	-0.104098	0.917092			(CS-) - CSR	10	Female	Appetitive	-0.3625	1.82578	Inf	-0.198545	0.842619			(CS-) - CSR	10	Female	Appetitive	1.1225	1.07762	Inf	1.04165	0.297576
(CS-) - CSR	11	Female	Appetitive	-0.4	0.247413	Inf	-1.61673	0.105937			(CS-) - CSR	11	Female	Appetitive	-0.147125	0.361439	Inf	-0.407054	0.683969			(CS-) - CSR	11	Female	Appetitive	-1.725	1.82578	Inf	-0.9448	0.344761			(CS-) - CSR	11	Female	Appetitive	1.42687	1.07762	Inf	1.3241	0.185471
(CS-) - CSR	12	Female	Appetitive	-0.6375	0.247413	Inf	-2.57666	0.00997599			(CS-) - CSR	12	Female	Appetitive	-0.1655	0.361439	Inf	-0.457892	0.64703			(CS-) - CSR	12	Female	Appetitive	-0.4625	1.82578	Inf	-0.253316	0.800024			(CS-) - CSR	12	Female	Appetitive	1.51475	1.07762	Inf	1.40564	0.159831
(CS-) - CSR	13	Female	Appetitive	-0.6625	0.247413	Inf	-2.67771	0.00741283			(CS-) - CSR	13	Female	Appetitive	0.155375	0.361439	Inf	0.429879	0.667284			(CS-) - CSR	13	Female	Appetitive	0.3375	1.82578	Inf	0.184852	0.853345			(CS-) - CSR	13	Female	Appetitive	0.71925	1.07762	Inf	0.667442	0.50449
(CS-) - CSR	14	Female	Appetitive	-1.55	0.247413	Inf	-6.26482	3.73271e-10			(CS-) - CSR	14	Female	Appetitive	-0.37775	0.361439	Inf	-1.04513	0.295964			(CS-) - CSR	14	Female	Appetitive	0.9875	1.82578	Inf	0.540864	0.588602			(CS-) - CSR	14	Female	Appetitive	1.97638	1.07762	Inf	1.83401	0.0666518
(CS-) - CSR	15	Female	Appetitive	-0.35	0.247413	Inf	-1.41464	0.333281			(CS-) - CSR	15	Female	Appetitive	-0.147	0.361439	Inf	-0.406708	0.912868			(CS-) - CSR	15	Female	Appetitive	1.85	1.82578	Inf	1.01326	0.568452			(CS-) - CSR	15	Female	Appetitive	0.2405	1.07762	Inf	0.223177	0.972916
(CS-) - CSR	1	Male	Appetitive	0.1375	0.247413	Inf	0.55575	0.578382			(CS-) - CSR	1	Male	Appetitive	0.131125	0.361439	Inf	0.362786	0.716765			(CS-) - CSR	1	Male	Appetitive	1.15	1.82578	Inf	0.629867	0.528782			(CS-) - CSR	1	Male	Appetitive	0.0495	1.07762	Inf	0.0459345	0.963362
(CS-) - CSR	2	Male	Appetitive	-0.1	0.247413	Inf	-0.404182	0.686079			(CS-) - CSR	2	Male	Appetitive	0.1995	0.361439	Inf	0.551961	0.580975			(CS-) - CSR	2	Male	Appetitive	-0.075	1.82578	Inf	-0.0410783	0.967234			(CS-) - CSR	2	Male	Appetitive	-0.397	1.07762	Inf	-0.368404	0.712572
(CS-) - CSR	3	Male	Appetitive	-0.25	0.247413	Inf	-1.01046	0.312277			(CS-) - CSR	3	Male	Appetitive	0.05525	0.361439	Inf	0.152861	0.878508			(CS-) - CSR	3	Male	Appetitive	1.55	1.82578	Inf	0.848951	0.395909			(CS-) - CSR	3	Male	Appetitive	0.427125	1.07762	Inf	0.396359	0.69184
(CS-) - CSR	4	Male	Appetitive	5.96745e-16	0.247413	Inf	2.41194e-15	1			(CS-) - CSR	4	Male	Appetitive	0.024125	0.361439	Inf	0.0667471	0.946783			(CS-) - CSR	4	Male	Appetitive	1.6	1.82578	Inf	0.876336	0.380847			(CS-) - CSR	4	Male	Appetitive	-0.304375	1.07762	Inf	-0.282451	0.777598
(CS-) - CSR	5	Male	Appetitive	0.125	0.247413	Inf	0.505228	0.613399			(CS-) - CSR	5	Male	Appetitive	0.000375	0.361439	Inf	0.00103752	0.999172			(CS-) - CSR	5	Male	Appetitive	1.775	1.82578	Inf	0.972185	0.330958			(CS-) - CSR	5	Male	Appetitive	0.242625	1.07762	Inf	0.225148	0.821864
(CS-) - CSR	6	Male	Appetitive	0.05	0.247413	Inf	0.202091	0.839846			(CS-) - CSR	6	Male	Appetitive	-0.183125	0.361439	Inf	-0.506656	0.612397			(CS-) - CSR	6	Male	Appetitive	-0.6125	1.82578	Inf	-0.335472	0.737269			(CS-) - CSR	6	Male	Appetitive	-0.220375	1.07762	Inf	-0.204501	0.837962
(CS-) - CSR	7	Male	Appetitive	-0.225	0.247413	Inf	-0.90941	0.363134			(CS-) - CSR	7	Male	Appetitive	-0.322875	0.361439	Inf	-0.893305	0.371694			(CS-) - CSR	7	Male	Appetitive	-2.475	1.82578	Inf	-1.35558	0.175232			(CS-) - CSR	7	Male	Appetitive	1.24375	1.07762	Inf	1.15416	0.248434
(CS-) - CSR	8	Male	Appetitive	-0.2875	0.247413	Inf	-1.16202	0.245226			(CS-) - CSR	8	Male	Appetitive	-0.293875	0.361439	Inf	-0.81307	0.416178			(CS-) - CSR	8	Male	Appetitive	-1.175	1.82578	Inf	-0.643559	0.519861			(CS-) - CSR	8	Male	Appetitive	0.04125	1.07762	Inf	0.0382787	0.969465
(CS-) - CSR	9	Male	Appetitive	0.15	0.247413	Inf	0.606273	0.544333			(CS-) - CSR	9	Male	Appetitive	0.268	0.361439	Inf	0.741481	0.458402			(CS-) - CSR	9	Male	Appetitive	0.4	1.82578	Inf	0.219084	0.826585			(CS-) - CSR	9	Male	Appetitive	-1.59838	1.07762	Inf	-1.48324	0.13801
(CS-) - CSR	10	Male	Appetitive	-0.05	0.247413	Inf	-0.202091	0.839846			(CS-) - CSR	10	Male	Appetitive	-0.125875	0.361439	Inf	-0.348261	0.727644			(CS-) - CSR	10	Male	Appetitive	-1.025	1.82578	Inf	-0.561403	0.574523			(CS-) - CSR	10	Male	Appetitive	-0.3005	1.07762	Inf	-0.278855	0.780356
(CS-) - CSR	11	Male	Appetitive	-0.625	0.247413	Inf	-2.52614	0.0115324			(CS-) - CSR	11	Male	Appetitive	-0.418125	0.361439	Inf	-1.15683	0.24734			(CS-) - CSR	11	Male	Appetitive	-0.1875	1.82578	Inf	-0.102696	0.918205			(CS-) - CSR	11	Male	Appetitive	1.25075	1.07762	Inf	1.16066	0.245781
(CS-) - CSR	12	Male	Appetitive	-0.3875	0.247413	Inf	-1.56621	0.117301			(CS-) - CSR	12	Male	Appetitive	-0.232	0.361439	Inf	-0.641879	0.520952			(CS-) - CSR	12	Male	Appetitive	0.4625	1.82578	Inf	0.253316	0.800024			(CS-) - CSR	12	Male	Appetitive	0.940625	1.07762	Inf	0.872871	0.382733
(CS-) - CSR	13	Male	Appetitive	-0.1375	0.247413	Inf	-0.55575	0.578382			(CS-) - CSR	13	Male	Appetitive	0.114125	0.361439	Inf	0.315752	0.752191			(CS-) - CSR	13	Male	Appetitive	-0.5625	1.82578	Inf	-0.308087	0.758016			(CS-) - CSR	13	Male	Appetitive	-0.161875	1.07762	Inf	-0.150215	0.880595
(CS-) - CSR	14	Male	Appetitive	-0.7875	0.247413	Inf	-3.18293	0.00145791			(CS-) - CSR	14	Male	Appetitive	-0.71625	0.361439	Inf	-1.98166	0.047517			(CS-) - CSR	14	Male	Appetitive	-0.9	1.82578	Inf	-0.492939	0.622056			(CS-) - CSR	14	Male	Appetitive	0.603375	1.07762	Inf	0.559913	0.575539
(CS-) - CSR	15	Male	Appetitive	-0.4	0.247413	Inf	-1.61673	0.238503			(CS-) - CSR	15	Male	Appetitive	-0.159	0.361439	Inf	-0.439908	0.898841			(CS-) - CSR	15	Male	Appetitive	-1.775	1.82578	Inf	-0.972185	0.594487			(CS-) - CSR	15	Male	Appetitive	1.0245	1.07762	Inf	0.950704	0.608127
HEs LME Model: HEs ~ Cue type * Sex * Protocol * Session + (1 | id)											TP LME Model: TP ~ Cue type * Sex * Protocol * Session + (1 | id)											Licks LME Model: Licks ~ Cue type * Sex * Protocol * Session + (1 | id)											Latency LME Model: Latency ~ Cue type * Sex * Protocol * Session + (1 | id)
term	estimate	std.error	statistic	conf.low	conf.high	group	level	section			term	estimate	std.error	statistic	conf.low	conf.high	group	level	section			term	estimate	std.error	statistic	conf.low	conf.high	group	level	section			term	estimate	std.error	statistic	conf.low	conf.high	group	level	section
(Intercept)	0.545946	0.0892776	6.11515	0.370965	0.720927			Fixed Effects			(Intercept)	0.900973	0.132213	6.81454	0.641839	1.16011			Fixed Effects			(Intercept)	0.545946	0.089278	6.11515	0.370965	0.720927			Fixed Effects			(Intercept)	11.9576	0.392871	30.4365	11.1876	12.7276			Fixed Effects
TypeCSR	0.0702703	0.115045	0.610808	-0.155213	0.295754			Fixed Effects			TypeCSR	0.0507568	0.168066	0.302006	-0.278646	0.380159			Fixed Effects			TypeCSR	0.07027	0.115045	0.610808	-0.15521	0.295754			Fixed Effects			TypeCSR	-0.986405	0.501084	-1.96854	-1.96851	-0.0042986			Fixed Effects
TypeCSS	-0.0972973	0.115045	-0.845734	-0.322781	0.128186			Fixed Effects			TypeCSS	-0.052973	0.168066	-0.315192	-0.382376	0.27643			Fixed Effects			TypeCSS	-0.0973	0.115045	-0.84573	-0.32278	0.128186			Fixed Effects			TypeCSS	-0.309189	0.501084	-0.617041	-1.2913	0.672918			Fixed Effects
SexMale	0.0486486	0.126258	0.385313	-0.198812	0.296109			Fixed Effects			SexMale	0.120919	0.186978	0.646701	-0.245551	0.487389			Fixed Effects			SexMale	0.048649	0.126258	0.385313	-0.19881	0.296109			Fixed Effects			SexMale	-0.405568	0.555603	-0.729959	-1.49453	0.683395			Fixed Effects
ProtocolAppetitive	0.541554	0.21174	2.55763	0.12655	0.956558			Fixed Effects			ProtocolAppetitive	0.549277	0.313572	1.75168	-0.065312	1.16387			Fixed Effects			ProtocolAppetitive	0.541554	0.21174	2.55763	0.12655	0.956558			Fixed Effects			ProtocolAppetitive	-1.574	0.931775	-1.68924	-3.40024	0.252249			Fixed Effects
as.factor(Session)2	0.143243	0.115045	1.24511	-0.0822405	0.368727			Fixed Effects			as.factor(Session)2	0.0405405	0.168066	0.241218	-0.288862	0.369943			Fixed Effects			as.factor(Session)2	0.143243	0.115045	1.24511	-0.08224	0.368727			Fixed Effects			as.factor(Session)2	-1.42243	0.501084	-2.83871	-2.40454	-0.440326			Fixed Effects
as.factor(Session)3	0.2	0.115045	1.73845	-0.0254837	0.425484			Fixed Effects			as.factor(Session)3	0.0730541	0.168066	0.434676	-0.256349	0.402457			Fixed Effects			as.factor(Session)3	0.2	0.115045	1.73845	-0.02548	0.425484			Fixed Effects			as.factor(Session)3	-1.84462	0.501084	-3.68126	-2.82673	-0.862515			Fixed Effects
as.factor(Session)4	-0.0810811	0.115045	-0.704778	-0.306565	0.144403			Fixed Effects			as.factor(Session)4	-0.199243	0.168066	-1.18551	-0.528646	0.130159			Fixed Effects			as.factor(Session)4	-0.08108	0.115045	-0.70478	-0.30656	0.144403			Fixed Effects			as.factor(Session)4	-0.806108	0.501084	-1.60873	-1.78821	0.175999			Fixed Effects
as.factor(Session)5	0.12973	0.115045	1.12764	-0.095754	0.355213			Fixed Effects			as.factor(Session)5	-0.0418919	0.168066	-0.249259	-0.371295	0.287511			Fixed Effects			as.factor(Session)5	0.12973	0.115045	1.12765	-0.09575	0.355213			Fixed Effects			as.factor(Session)5	-1.67824	0.501084	-3.34922	-2.66035	-0.696136			Fixed Effects
as.factor(Session)6	0.0810811	0.115045	0.704778	-0.144403	0.306565			Fixed Effects			as.factor(Session)6	-0.181162	0.168066	-1.07792	-0.510565	0.14824			Fixed Effects			as.factor(Session)6	0.081081	0.115045	0.704778	-0.1444	0.306565			Fixed Effects			as.factor(Session)6	-1.11649	0.501084	-2.22814	-2.09859	-0.13438			Fixed Effects
as.factor(Session)7	0.17027	0.115045	1.48003	-0.0552135	0.395754			Fixed Effects			as.factor(Session)7	0.158432	0.168066	0.942682	-0.17097	0.487835			Fixed Effects			as.factor(Session)7	0.17027	0.115045	1.48003	-0.05521	0.395754			Fixed Effects			as.factor(Session)7	-1.59138	0.501084	-3.17587	-2.57349	-0.609272			Fixed Effects
as.factor(Session)8	0.189189	0.115045	1.64448	-0.0362946	0.414673			Fixed Effects			as.factor(Session)8	0.0752432	0.168066	0.447701	-0.254159	0.404646			Fixed Effects			as.factor(Session)8	0.189189	0.115045	1.64448	-0.03629	0.414673			Fixed Effects			as.factor(Session)8	-2.05276	0.501084	-4.09663	-3.03486	-1.07065			Fixed Effects
as.factor(Session)9	0.22973	0.115045	1.99687	0.00424599	0.455213			Fixed Effects			as.factor(Session)9	0.00897297	0.168066	0.0533897	-0.32043	0.338376			Fixed Effects			as.factor(Session)9	0.22973	0.115045	1.99687	0.004246	0.455213			Fixed Effects			as.factor(Session)9	-2.25692	0.501084	-4.50407	-3.23903	-1.27481			Fixed Effects
as.factor(Session)10	0.0216216	0.115045	0.187941	-0.203862	0.247105			Fixed Effects			as.factor(Session)10	-0.00286486	0.168066	-0.0170461	-0.332267	0.326538			Fixed Effects			as.factor(Session)10	0.021622	0.115045	0.187941	-0.20386	0.247105			Fixed Effects			as.factor(Session)10	-1.36351	0.501084	-2.72113	-2.34562	-0.381407			Fixed Effects
as.factor(Session)11	0.0756757	0.115045	0.657793	-0.149808	0.301159			Fixed Effects			as.factor(Session)11	0.0584054	0.168066	0.347515	-0.270997	0.387808			Fixed Effects			as.factor(Session)11	0.075676	0.115045	0.657793	-0.14981	0.301159			Fixed Effects			as.factor(Session)11	-1.66584	0.501084	-3.32447	-2.64794	-0.683731			Fixed Effects
as.factor(Session)12	0.191892	0.115045	1.66797	-0.0335918	0.417376			Fixed Effects			as.factor(Session)12	0.173703	0.168066	1.03354	-0.1557	0.503105			Fixed Effects			as.factor(Session)12	0.191892	0.115045	1.66797	-0.03359	0.417376			Fixed Effects			as.factor(Session)12	-2.4823	0.501084	-4.95385	-3.4644	-1.50019			Fixed Effects
as.factor(Session)13	0.0540541	0.115045	0.469852	-0.17143	0.279538			Fixed Effects			as.factor(Session)13	0.100865	0.168066	0.600152	-0.228538	0.430267			Fixed Effects			as.factor(Session)13	0.054054	0.115045	0.469852	-0.17143	0.279538			Fixed Effects			as.factor(Session)13	-1.91795	0.501084	-3.82759	-2.90005	-0.935839			Fixed Effects
as.factor(Session)14	0.213514	0.115045	1.85592	-0.0119702	0.438997			Fixed Effects			as.factor(Session)14	0.00318919	0.168066	0.0189759	-0.326213	0.332592			Fixed Effects			as.factor(Session)14	0.213514	0.115045	1.85592	-0.01197	0.438997			Fixed Effects			as.factor(Session)14	-2.62195	0.501084	-5.23255	-3.60405	-1.63984			Fixed Effects
as.factor(Session)15	-0.0324324	0.115045	-0.281911	-0.257916	0.193051			Fixed Effects			as.factor(Session)15	-0.462811	0.168066	-2.75375	-0.792213	-0.133408			Fixed Effects			as.factor(Session)15	-0.03243	0.115045	-0.28191	-0.25792	0.193051			Fixed Effects			as.factor(Session)15	-0.863405	0.501084	-1.72307	-1.84551	0.118701			Fixed Effects
TypeCSR:SexMale	-0.0405405	0.162698	-0.249177	-0.359423	0.278342			Fixed Effects			TypeCSR:SexMale	0.125838	0.237681	0.529441	-0.340008	0.591684			Fixed Effects			TypeCSR:SexMale	-0.04054	0.162698	-0.24918	-0.35942	0.278342			Fixed Effects			TypeCSR:SexMale	0.429351	0.70864	0.605881	-0.959557	1.81826			Fixed Effects
TypeCSS:SexMale	0.0324324	0.162698	0.199341	-0.28645	0.351315			Fixed Effects			TypeCSS:SexMale	0.150703	0.237681	0.634055	-0.315143	0.616548			Fixed Effects			TypeCSS:SexMale	0.032432	0.162698	0.199341	-0.28645	0.351315			Fixed Effects			TypeCSS:SexMale	0.14573	0.70864	0.205647	-1.24318	1.53464			Fixed Effects
TypeCSR:ProtocolAppetitive	0.24223	0.272853	0.887767	-0.292552	0.777011			Fixed Effects			TypeCSR:ProtocolAppetitive	0.267368	0.398603	0.670764	-0.513879	1.04862			Fixed Effects			TypeCSR:ProtocolAppetitive	0.24223	0.272853	0.887767	-0.29255	0.777011			Fixed Effects			TypeCSR:ProtocolAppetitive	-1.15747	1.18843	-0.973952	-3.48674	1.1718			Fixed Effects
TypeCSS:ProtocolAppetitive	0.343243	0.272853	1.25798	-0.191538	0.878025			Fixed Effects			TypeCSS:ProtocolAppetitive	0.361736	0.398603	0.907511	-0.41951	1.14298			Fixed Effects			TypeCSS:ProtocolAppetitive	0.343243	0.272853	1.25798	-0.19154	0.878025			Fixed Effects			TypeCSS:ProtocolAppetitive	-2.32845	1.18843	-1.95928	-4.65772	0.000818101			Fixed Effects
SexMale:ProtocolAppetitive	0.151351	0.299446	0.505437	-0.435553	0.738255			Fixed Effects			SexMale:ProtocolAppetitive	0.523956	0.443457	1.18153	-0.345204	1.39312			Fixed Effects			SexMale:ProtocolAppetitive	0.151351	0.299446	0.505437	-0.43555	0.738255			Fixed Effects			SexMale:ProtocolAppetitive	-1.33956	1.31773	-1.01657	-3.92226	1.24314			Fixed Effects
TypeCSR:as.factor(Session)2	-0.0162162	0.162698	-0.0996707	-0.335098	0.302666			Fixed Effects			TypeCSR:as.factor(Session)2	0.130486	0.237681	0.548999	-0.335359	0.596332			Fixed Effects			TypeCSR:as.factor(Session)2	-0.01622	0.162698	-0.09967	-0.3351	0.302666			Fixed Effects			TypeCSR:as.factor(Session)2	0.461892	0.70864	0.651801	-0.927017	1.8508			Fixed Effects
TypeCSR:as.factor(Session)3	-0.0675676	0.162698	-0.415294	-0.38645	0.251315			Fixed Effects			TypeCSR:as.factor(Session)3	-0.0217568	0.237681	-0.0915377	-0.487602	0.444089			Fixed Effects			TypeCSR:as.factor(Session)3	-0.06757	0.162698	-0.41529	-0.38645	0.251315			Fixed Effects			TypeCSR:as.factor(Session)3	0.748189	0.70864	1.05581	-0.64072	2.1371			Fixed Effects
TypeCSR:as.factor(Session)4	-0.0189189	0.162698	-0.116282	-0.337801	0.299963			Fixed Effects			TypeCSR:as.factor(Session)4	0.0400541	0.237681	0.16852	-0.425792	0.5059			Fixed Effects			TypeCSR:as.factor(Session)4	-0.01892	0.162698	-0.11628	-0.3378	0.299963			Fixed Effects			TypeCSR:as.factor(Session)4	0.923162	0.70864	1.30272	-0.465747	2.31207			Fixed Effects
TypeCSS:as.factor(Session)4	-0.259459	0.162698	-1.59473	-0.578342	0.0594227			Fixed Effects			TypeCSS:as.factor(Session)4	-0.381622	0.237681	-1.60561	-0.847467	0.084224			Fixed Effects			TypeCSS:as.factor(Session)4	-0.25946	0.162698	-1.59473	-0.57834	0.059423			Fixed Effects			TypeCSS:as.factor(Session)4	2.97941	0.70864	4.2044	1.5905	4.36831			Fixed Effects
TypeCSR:as.factor(Session)5	2.51301e-13	0.162698	1.54458e-12	-0.318882	0.318882			Fixed Effects			TypeCSR:as.factor(Session)5	0.00697297	0.237681	0.0293376	-0.458873	0.472819			Fixed Effects			TypeCSR:as.factor(Session)5	2.51e-13	0.162698	1.54e-12	-0.31888	0.318882			Fixed Effects			TypeCSR:as.factor(Session)5	0.859514	0.70864	1.21291	-0.529395	2.24842			Fixed Effects
TypeCSR:as.factor(Session)6	-0.0351351	0.162698	-0.215953	-0.354017	0.283747			Fixed Effects			TypeCSR:as.factor(Session)6	0.0561892	0.237681	0.236406	-0.409656	0.522035			Fixed Effects			TypeCSR:as.factor(Session)6	-0.03514	0.162698	-0.21595	-0.35402	0.283747			Fixed Effects			TypeCSR:as.factor(Session)6	0.408838	0.70864	0.576933	-0.980071	1.79775			Fixed Effects
TypeCSR:as.factor(Session)7	-0.0432432	0.162698	-0.265788	-0.362125	0.275639			Fixed Effects			TypeCSR:as.factor(Session)7	-0.12727	0.237681	-0.535467	-0.593116	0.338575			Fixed Effects			TypeCSR:as.factor(Session)7	-0.04324	0.162698	-0.26579	-0.36213	0.275639			Fixed Effects			TypeCSR:as.factor(Session)7	0.529324	0.70864	0.746958	-0.859584	1.91823			Fixed Effects
TypeCSS:as.factor(Session)7	-0.513673	0.165206	-3.1093	-0.83747	-0.189877			Fixed Effects			TypeCSS:as.factor(Session)7	-0.88769	0.241346	-3.67809	-1.36072	-0.414661			Fixed Effects			TypeCSS:as.factor(Session)7	-0.51367	0.165206	-3.1093	-0.83747	-0.18988			Fixed Effects			TypeCSS:as.factor(Session)7	3.60409	0.719565	5.0087	2.19377	5.01441			Fixed Effects
TypeCSR:as.factor(Session)8	-0.137838	0.162698	-0.847201	-0.45672	0.181044			Fixed Effects			TypeCSR:as.factor(Session)8	-0.0735135	0.237681	-0.309295	-0.539359	0.392332			Fixed Effects			TypeCSR:as.factor(Session)8	-0.13784	0.162698	-0.8472	-0.45672	0.181044			Fixed Effects			TypeCSR:as.factor(Session)8	1.47795	0.70864	2.08561	0.0890372	2.86685			Fixed Effects
TypeCSR:as.factor(Session)9	-0.186486	0.162698	-1.14621	-0.505369	0.132396			Fixed Effects			TypeCSR:as.factor(Session)9	-0.0857297	0.237681	-0.360693	-0.551575	0.380116			Fixed Effects			TypeCSR:as.factor(Session)9	-0.18649	0.162698	-1.14621	-0.50537	0.132396			Fixed Effects			TypeCSR:as.factor(Session)9	1.03622	0.70864	1.46226	-0.352693	2.42512			Fixed Effects
TypeCSR:as.factor(Session)10	0.0135135	0.162698	0.0830589	-0.305369	0.332396			Fixed Effects			TypeCSR:as.factor(Session)10	-0.00743243	0.237681	-0.0312707	-0.473278	0.458413			Fixed Effects			TypeCSR:as.factor(Session)10	0.013514	0.162698	0.083059	-0.30537	0.332396			Fixed Effects			TypeCSR:as.factor(Session)10	0.458595	0.70864	0.647148	-0.930314	1.8475			Fixed Effects
TypeCSS:as.factor(Session)10	-0.356757	0.162698	-2.19275	-0.675639	-0.0378746			Fixed Effects			TypeCSS:as.factor(Session)10	-0.781189	0.237681	-3.28672	-1.24703	-0.315344			Fixed Effects			TypeCSS:as.factor(Session)10	-0.35676	0.162698	-2.19275	-0.67564	-0.03787			Fixed Effects			TypeCSS:as.factor(Session)10	3.49378	0.70864	4.93027	2.10488	4.88269			Fixed Effects
TypeCSR:as.factor(Session)11	0.0810811	0.162698	0.498353	-0.237801	0.399963			Fixed Effects			TypeCSR:as.factor(Session)11	0.00478378	0.237681	0.0201269	-0.461062	0.470629			Fixed Effects			TypeCSR:as.factor(Session)11	0.081081	0.162698	0.498353	-0.2378	0.399963			Fixed Effects			TypeCSR:as.factor(Session)11	0.381054	0.70864	0.537726	-1.00785	1.76996			Fixed Effects
TypeCSR:as.factor(Session)12	0.148649	0.162698	0.913648	-0.170234	0.467531			Fixed Effects			TypeCSR:as.factor(Session)12	-0.0173243	0.237681	-0.0728891	-0.48317	0.448521			Fixed Effects			TypeCSR:as.factor(Session)12	0.148649	0.162698	0.913648	-0.17023	0.467531			Fixed Effects			TypeCSR:as.factor(Session)12	0.432216	0.70864	0.609924	-0.956693	1.82112			Fixed Effects
TypeCSR:as.factor(Session)13	0.567568	0.162698	3.48847	0.248685	0.88645			Fixed Effects			TypeCSR:as.factor(Session)13	0.335	0.237681	1.40945	-0.130846	0.800846			Fixed Effects			TypeCSR:as.factor(Session)13	0.567568	0.162698	3.48847	0.248685	0.88645			Fixed Effects			TypeCSR:as.factor(Session)13	-0.458838	0.70864	-0.647491	-1.84775	0.930071			Fixed Effects
TypeCSS:as.factor(Session)13	-0.372973	0.162698	-2.29243	-0.691855	-0.0540908			Fixed Effects			TypeCSS:as.factor(Session)13	-0.880324	0.237681	-3.70381	-1.34617	-0.414479			Fixed Effects			TypeCSS:as.factor(Session)13	-0.37297	0.162698	-2.29243	-0.69186	-0.05409			Fixed Effects			TypeCSS:as.factor(Session)13	3.79951	0.70864	5.3617	2.4106	5.18842			Fixed Effects
TypeCSR:as.factor(Session)14	0.321622	0.162698	1.9768	0.00273946	0.640504			Fixed Effects			TypeCSR:as.factor(Session)14	0.510162	0.237681	2.14642	0.0443165	0.976008			Fixed Effects			TypeCSR:as.factor(Session)14	0.321622	0.162698	1.9768	0.002739	0.640504			Fixed Effects			TypeCSR:as.factor(Session)14	0.097973	0.70864	0.138255	-1.29094	1.48688			Fixed Effects
TypeCSR:as.factor(Session)15	0.227027	0.162698	1.39539	-0.0918551	0.545909			Fixed Effects			TypeCSR:as.factor(Session)15	0.183189	0.237681	0.770736	-0.282656	0.649035			Fixed Effects			TypeCSR:as.factor(Session)15	0.227027	0.162698	1.39539	-0.09186	0.545909			Fixed Effects			TypeCSR:as.factor(Session)15	0.862892	0.70864	1.21767	-0.526017	2.2518			Fixed Effects
TypeCSS:as.factor(Session)15	-0.345946	0.162698	-2.12631	-0.664828	-0.0270638			Fixed Effects			TypeCSS:as.factor(Session)15	-0.357514	0.237681	-1.50418	-0.823359	0.108332			Fixed Effects			TypeCSS:as.factor(Session)15	-0.34595	0.162698	-2.12631	-0.66483	-0.02706			Fixed Effects			TypeCSS:as.factor(Session)15	3.54989	0.70864	5.00944	2.16098	4.9388			Fixed Effects
SexMale:as.factor(Session)2	-0.0567568	0.162698	-0.348847	-0.375639	0.262125			Fixed Effects			SexMale:as.factor(Session)2	-0.0285135	0.237681	-0.119966	-0.494359	0.437332			Fixed Effects			SexMale:as.factor(Session)2	-0.05676	0.162698	-0.34885	-0.37564	0.262125			Fixed Effects			SexMale:as.factor(Session)2	0.269486	0.70864	0.380287	-1.11942	1.6584			Fixed Effects
SexMale:as.factor(Session)3	0.0405405	0.162698	0.249177	-0.278342	0.359423			Fixed Effects			SexMale:as.factor(Session)3	0.266865	0.237681	1.12279	-0.198981	0.732711			Fixed Effects			SexMale:as.factor(Session)3	0.040541	0.162698	0.249177	-0.27834	0.359423			Fixed Effects			SexMale:as.factor(Session)3	-0.00143243	0.70864	-0.00202138	-1.39034	1.38748			Fixed Effects
SexMale:as.factor(Session)4	0.216216	0.162698	1.32894	-0.102666	0.535098			Fixed Effects			SexMale:as.factor(Session)4	0.320108	0.237681	1.3468	-0.145738	0.785954			Fixed Effects			SexMale:as.factor(Session)4	0.216216	0.162698	1.32894	-0.10267	0.535098			Fixed Effects			SexMale:as.factor(Session)4	-0.737243	0.70864	-1.04036	-2.12615	0.651666			Fixed Effects
SexMale:as.factor(Session)5	0.0324324	0.162698	0.199341	-0.28645	0.351315			Fixed Effects			SexMale:as.factor(Session)5	0.226216	0.237681	0.951765	-0.239629	0.692062			Fixed Effects			SexMale:as.factor(Session)5	0.032432	0.162698	0.199341	-0.28645	0.351315			Fixed Effects			SexMale:as.factor(Session)5	0.145378	0.70864	0.205151	-1.24353	1.53429			Fixed Effects
SexMale:as.factor(Session)6	0.0432432	0.162698	0.265788	-0.275639	0.362125			Fixed Effects			SexMale:as.factor(Session)6	0.254162	0.237681	1.06934	-0.211684	0.720008			Fixed Effects			SexMale:as.factor(Session)6	0.043243	0.162698	0.265788	-0.27564	0.362125			Fixed Effects			SexMale:as.factor(Session)6	-0.377135	0.70864	-0.532196	-1.76604	1.01177			Fixed Effects
SexMale:as.factor(Session)7	-0.113514	0.162698	-0.697695	-0.432396	0.205369			Fixed Effects			SexMale:as.factor(Session)7	-0.111838	0.237681	-0.470538	-0.577684	0.354008			Fixed Effects			SexMale:as.factor(Session)7	-0.11351	0.162698	-0.69769	-0.4324	0.205369			Fixed Effects			SexMale:as.factor(Session)7	0.440919	0.70864	0.622204	-0.94799	1.82983			Fixed Effects
SexMale:as.factor(Session)8	-0.286486	0.162698	-1.76085	-0.605369	0.0323957			Fixed Effects			SexMale:as.factor(Session)8	-0.231919	0.237681	-0.975758	-0.697765	0.233927			Fixed Effects			SexMale:as.factor(Session)8	-0.28649	0.162698	-1.76085	-0.60537	0.032396			Fixed Effects			SexMale:as.factor(Session)8	1.40449	0.70864	1.98195	0.0155777	2.7934			Fixed Effects
SexMale:as.factor(Session)9	-0.278378	0.162698	-1.71101	-0.597261	0.0405038			Fixed Effects			SexMale:as.factor(Session)9	-0.20527	0.237681	-0.863639	-0.671116	0.260575			Fixed Effects			SexMale:as.factor(Session)9	-0.27838	0.162698	-1.71101	-0.59726	0.040504			Fixed Effects			SexMale:as.factor(Session)9	1.31173	0.70864	1.85105	-0.077179	2.70064			Fixed Effects
SexMale:as.factor(Session)10	-0.0432432	0.162698	-0.265788	-0.362125	0.275639			Fixed Effects			SexMale:as.factor(Session)10	-0.120865	0.237681	-0.508518	-0.586711	0.344981			Fixed Effects			SexMale:as.factor(Session)10	-0.04324	0.162698	-0.26579	-0.36213	0.275639			Fixed Effects			SexMale:as.factor(Session)10	0.402757	0.70864	0.568352	-0.986152	1.79167			Fixed Effects
SexMale:as.factor(Session)11	-0.164865	0.162698	-1.01332	-0.483747	0.154017			Fixed Effects			SexMale:as.factor(Session)11	-0.250054	0.237681	-1.05206	-0.7159	0.215792			Fixed Effects			SexMale:as.factor(Session)11	-0.16486	0.162698	-1.01332	-0.48375	0.154017			Fixed Effects			SexMale:as.factor(Session)11	0.688135	0.70864	0.971065	-0.700774	2.07704			Fixed Effects
SexMale:as.factor(Session)12	-0.289189	0.162698	-1.77746	-0.608071	0.029693			Fixed Effects			SexMale:as.factor(Session)12	-0.372946	0.237681	-1.5691	-0.838792	0.0928997			Fixed Effects			SexMale:as.factor(Session)12	-0.28919	0.162698	-1.77746	-0.60807	0.029693			Fixed Effects			SexMale:as.factor(Session)12	1.59297	0.70864	2.24793	0.204064	2.98188			Fixed Effects
SexMale:as.factor(Session)13	-0.0810811	0.162698	-0.498353	-0.399963	0.237801			Fixed Effects			SexMale:as.factor(Session)13	-0.101405	0.237681	-0.426645	-0.567251	0.36444			Fixed Effects			SexMale:as.factor(Session)13	-0.08108	0.162698	-0.49835	-0.39996	0.237801			Fixed Effects			SexMale:as.factor(Session)13	0.90573	0.70864	1.27812	-0.483179	2.29464			Fixed Effects
SexMale:as.factor(Session)14	-0.327027	0.162698	-2.01003	-0.645909	-0.00814486			Fixed Effects			SexMale:as.factor(Session)14	-0.201865	0.237681	-0.849311	-0.667711	0.263981			Fixed Effects			SexMale:as.factor(Session)14	-0.32703	0.162698	-2.01003	-0.64591	-0.00814			Fixed Effects			SexMale:as.factor(Session)14	2.0673	0.70864	2.91727	0.678389	3.45621			Fixed Effects
SexMale:as.factor(Session)15	-0.167568	0.162698	-1.02993	-0.48645	0.151315			Fixed Effects			SexMale:as.factor(Session)15	0.0144324	0.237681	0.0607219	-0.451413	0.480278			Fixed Effects			SexMale:as.factor(Session)15	-0.16757	0.162698	-1.02993	-0.48645	0.151315			Fixed Effects			SexMale:as.factor(Session)15	0.977514	0.70864	1.37942	-0.411395	2.36642			Fixed Effects
ProtocolAppetitive:as.factor(Session)2	-0.355743	0.272853	-1.30379	-0.890525	0.179038			Fixed Effects			ProtocolAppetitive:as.factor(Session)2	-0.466291	0.398603	-1.16981	-1.24754	0.314956			Fixed Effects			ProtocolAppetitive:as.factor(Session)2	-0.35574	0.272853	-1.30379	-0.89052	0.179038			Fixed Effects			ProtocolAppetitive:as.factor(Session)2	1.40856	1.18843	1.18523	-0.920713	3.73783			Fixed Effects
ProtocolAppetitive:as.factor(Session)3	-0.575	0.272853	-2.10736	-1.10978	-0.0402184			Fixed Effects			ProtocolAppetitive:as.factor(Session)3	-0.747179	0.398603	-1.8745	-1.52843	0.0340679			Fixed Effects			ProtocolAppetitive:as.factor(Session)3	-0.575	0.272853	-2.10736	-1.10978	-0.04022			Fixed Effects			ProtocolAppetitive:as.factor(Session)3	1.61262	1.18843	1.35694	-0.716649	3.94189			Fixed Effects
ProtocolAppetitive:as.factor(Session)4	-0.0564189	0.272853	-0.206774	-0.591201	0.478363			Fixed Effects			ProtocolAppetitive:as.factor(Session)4	-0.260132	0.398603	-0.652609	-1.04138	0.521115			Fixed Effects			ProtocolAppetitive:as.factor(Session)4	-0.05642	0.272853	-0.20677	-0.5912	0.478363			Fixed Effects			ProtocolAppetitive:as.factor(Session)4	0.265733	1.18843	0.223601	-2.06354	2.595			Fixed Effects
ProtocolAppetitive:as.factor(Session)5	-0.79223	0.272853	-2.90351	-1.32701	-0.257448			Fixed Effects			ProtocolAppetitive:as.factor(Session)5	-0.939733	0.398603	-2.35757	-1.72098	-0.158486			Fixed Effects			ProtocolAppetitive:as.factor(Session)5	-0.79223	0.272853	-2.90351	-1.32701	-0.25745			Fixed Effects			ProtocolAppetitive:as.factor(Session)5	2.85724	1.18843	2.40423	0.527972	5.18651			Fixed Effects
ProtocolAppetitive:as.factor(Session)6	-0.431081	0.272853	-1.5799	-0.965863	0.103701			Fixed Effects			ProtocolAppetitive:as.factor(Session)6	-0.296088	0.398603	-0.742814	-1.07733	0.485159			Fixed Effects			ProtocolAppetitive:as.factor(Session)6	-0.43108	0.272853	-1.5799	-0.96586	0.103701			Fixed Effects			ProtocolAppetitive:as.factor(Session)6	0.560486	1.18843	0.471621	-1.76878	2.88976			Fixed Effects
ProtocolAppetitive:as.factor(Session)7	-0.79527	0.272853	-2.91465	-1.33005	-0.260489			Fixed Effects			ProtocolAppetitive:as.factor(Session)7	-0.840307	0.398603	-2.10813	-1.62155	-0.0590605			Fixed Effects			ProtocolAppetitive:as.factor(Session)7	-0.79527	0.272853	-2.91465	-1.33005	-0.26049			Fixed Effects			ProtocolAppetitive:as.factor(Session)7	2.71613	1.18843	2.28549	0.386858	5.0454			Fixed Effects
ProtocolAppetitive:as.factor(Session)8	-0.364189	0.272853	-1.33475	-0.898971	0.170592			Fixed Effects			ProtocolAppetitive:as.factor(Session)8	-0.602618	0.398603	-1.51183	-1.38387	0.178629			Fixed Effects			ProtocolAppetitive:as.factor(Session)8	-0.36419	0.272853	-1.33475	-0.89897	0.170592			Fixed Effects			ProtocolAppetitive:as.factor(Session)8	1.13088	1.18843	0.95158	-1.19839	3.46015			Fixed Effects
ProtocolAppetitive:as.factor(Session)9	-0.87973	0.272853	-3.22419	-1.41451	-0.344948			Fixed Effects			ProtocolAppetitive:as.factor(Session)9	-0.733348	0.398603	-1.8398	-1.51459	0.047899			Fixed Effects			ProtocolAppetitive:as.factor(Session)9	-0.87973	0.272853	-3.22419	-1.41451	-0.34495			Fixed Effects			ProtocolAppetitive:as.factor(Session)9	3.15542	1.18843	2.65513	0.826148	5.48469			Fixed Effects
ProtocolAppetitive:as.factor(Session)10	-0.646622	0.272853	-2.36986	-1.1814	-0.11184			Fixed Effects			ProtocolAppetitive:as.factor(Session)10	-0.69351	0.398603	-1.73985	-1.47476	0.0877368			Fixed Effects			ProtocolAppetitive:as.factor(Session)10	-0.64662	0.272853	-2.36986	-1.1814	-0.11184			Fixed Effects			ProtocolAppetitive:as.factor(Session)10	1.92026	1.18843	1.6158	-0.409007	4.24953			Fixed Effects
ProtocolAppetitive:as.factor(Session)11	-0.663176	0.272853	-2.43053	-1.19796	-0.128394			Fixed Effects			ProtocolAppetitive:as.factor(Session)11	-0.794405	0.398603	-1.99298	-1.57565	-0.0131585			Fixed Effects			ProtocolAppetitive:as.factor(Session)11	-0.66318	0.272853	-2.43053	-1.19796	-0.12839			Fixed Effects			ProtocolAppetitive:as.factor(Session)11	2.48971	1.18843	2.09497	0.160442	4.81898			Fixed Effects
ProtocolAppetitive:as.factor(Session)12	-0.791892	0.272853	-2.90227	-1.32667	-0.25711			Fixed Effects			ProtocolAppetitive:as.factor(Session)12	-1.07058	0.398603	-2.68583	-1.85182	-0.289331			Fixed Effects			ProtocolAppetitive:as.factor(Session)12	-0.79189	0.272853	-2.90227	-1.32667	-0.25711			Fixed Effects			ProtocolAppetitive:as.factor(Session)12	3.61667	1.18843	3.04325	1.2874	5.94594			Fixed Effects
ProtocolAppetitive:as.factor(Session)13	-0.691554	0.272853	-2.53453	-1.22634	-0.156772			Fixed Effects			ProtocolAppetitive:as.factor(Session)13	-0.973865	0.398603	-2.4432	-1.75511	-0.192618			Fixed Effects			ProtocolAppetitive:as.factor(Session)13	-0.69155	0.272853	-2.53453	-1.22634	-0.15677			Fixed Effects			ProtocolAppetitive:as.factor(Session)13	3.07882	1.18843	2.59067	0.74955	5.40809			Fixed Effects
ProtocolAppetitive:as.factor(Session)14	-0.888514	0.272853	-3.25638	-1.4233	-0.353732			Fixed Effects			ProtocolAppetitive:as.factor(Session)14	-0.901939	0.398603	-2.26275	-1.68319	-0.120692			Fixed Effects			ProtocolAppetitive:as.factor(Session)14	-0.88851	0.272853	-3.25638	-1.4233	-0.35373			Fixed Effects			ProtocolAppetitive:as.factor(Session)14	3.87257	1.18843	3.25857	1.5433	6.20184			Fixed Effects
ProtocolAppetitive:as.factor(Session)15	-0.830068	0.272853	-3.04218	-1.36485	-0.295286			Fixed Effects			ProtocolAppetitive:as.factor(Session)15	-0.832939	0.398603	-2.08965	-1.61419	-0.0516923			Fixed Effects			ProtocolAppetitive:as.factor(Session)15	-0.83007	0.272853	-3.04218	-1.36485	-0.29529			Fixed Effects			ProtocolAppetitive:as.factor(Session)15	3.34703	1.18843	2.81636	1.01776	5.6763			Fixed Effects
TypeCSR:SexMale:ProtocolAppetitive	-0.409459	0.385872	-1.06113	-1.16575	0.346836			Fixed Effects			TypeCSR:SexMale:ProtocolAppetitive	-0.575088	0.563709	-1.02019	-1.67994	0.529762			Fixed Effects			TypeCSR:SexMale:ProtocolAppetitive	-0.40946	0.385872	-1.06113	-1.16575	0.346836			Fixed Effects			TypeCSR:SexMale:ProtocolAppetitive	1.66502	1.68069	0.99068	-1.62906	4.95911			Fixed Effects
TypeCSS:SexMale:ProtocolAppetitive	-0.118919	0.385872	-0.308182	-0.875214	0.637377			Fixed Effects			TypeCSS:SexMale:ProtocolAppetitive	-0.382426	0.563709	-0.678409	-1.48728	0.722424			Fixed Effects			TypeCSS:SexMale:ProtocolAppetitive	-0.11892	0.385872	-0.30818	-0.87521	0.637377			Fixed Effects			TypeCSS:SexMale:ProtocolAppetitive	-0.845466	1.68069	-0.503048	-4.13955	2.44862			Fixed Effects
TypeCSR:SexMale:as.factor(Session)2	0.2	0.23009	0.869226	-0.250967	0.650967			Fixed Effects			TypeCSR:SexMale:as.factor(Session)2	0.0915405	0.336131	0.272336	-0.567265	0.750346			Fixed Effects			TypeCSR:SexMale:as.factor(Session)2	0.2	0.23009	0.869226	-0.25097	0.650967			Fixed Effects			TypeCSR:SexMale:as.factor(Session)2	-0.839676	1.00217	-0.837859	-2.80389	1.12454			Fixed Effects
TypeCSR:SexMale:as.factor(Session)3	0.191892	0.23009	0.833987	-0.259076	0.642859			Fixed Effects			TypeCSR:SexMale:as.factor(Session)3	0.189486	0.336131	0.563728	-0.469319	0.848292			Fixed Effects			TypeCSR:SexMale:as.factor(Session)3	0.191892	0.23009	0.833987	-0.25908	0.642859			Fixed Effects			TypeCSR:SexMale:as.factor(Session)3	-1.22216	1.00217	-1.21952	-3.18638	0.742051			Fixed Effects
TypeCSR:SexMale:as.factor(Session)4	-0.072973	0.23009	-0.31715	-0.52394	0.377995			Fixed Effects			TypeCSR:SexMale:as.factor(Session)4	-0.156541	0.336131	-0.465712	-0.815346	0.502265			Fixed Effects			TypeCSR:SexMale:as.factor(Session)4	-0.07297	0.23009	-0.31715	-0.52394	0.377995			Fixed Effects			TypeCSR:SexMale:as.factor(Session)4	-0.0655676	1.00217	-0.0654257	-2.02978	1.89865			Fixed Effects
TypeCSS:SexMale:as.factor(Session)4	-0.210811	0.23009	-0.916212	-0.661778	0.240157			Fixed Effects			TypeCSS:SexMale:as.factor(Session)4	-0.437514	0.336131	-1.30161	-1.09632	0.221292			Fixed Effects			TypeCSS:SexMale:as.factor(Session)4	-0.21081	0.23009	-0.91621	-0.66178	0.240157			Fixed Effects			TypeCSS:SexMale:as.factor(Session)4	0.420919	1.00217	0.420008	-1.54329	2.38513			Fixed Effects
TypeCSR:SexMale:as.factor(Session)5	-0.108108	0.23009	-0.469852	-0.559076	0.342859			Fixed Effects			TypeCSR:SexMale:as.factor(Session)5	-0.359189	0.336131	-1.0686	-1.01799	0.299616			Fixed Effects			TypeCSR:SexMale:as.factor(Session)5	-0.10811	0.23009	-0.46985	-0.55908	0.342859			Fixed Effects			TypeCSR:SexMale:as.factor(Session)5	-0.156108	1.00217	-0.15577	-2.12032	1.80811			Fixed Effects
TypeCSR:SexMale:as.factor(Session)6	0.0405405	0.23009	0.176195	-0.410427	0.491508			Fixed Effects			TypeCSR:SexMale:as.factor(Session)6	-0.256162	0.336131	-0.76209	-0.914967	0.402643			Fixed Effects			TypeCSR:SexMale:as.factor(Session)6	0.040541	0.23009	0.176195	-0.41043	0.491508			Fixed Effects			TypeCSR:SexMale:as.factor(Session)6	0.132892	1.00217	0.132604	-1.83132	2.09711			Fixed Effects
TypeCSR:SexMale:as.factor(Session)7	0.0486486	0.23009	0.211433	-0.402319	0.499616			Fixed Effects			TypeCSR:SexMale:as.factor(Session)7	-0.15473	0.336131	-0.460325	-0.813535	0.504076			Fixed Effects			TypeCSR:SexMale:as.factor(Session)7	0.048649	0.23009	0.211433	-0.40232	0.499616			Fixed Effects			TypeCSR:SexMale:as.factor(Session)7	-0.509162	1.00217	-0.508061	-2.47338	1.45505			Fixed Effects
TypeCSS:SexMale:as.factor(Session)7	0.168026	0.233636	0.71918	-0.289892	0.625944			Fixed Effects			TypeCSS:SexMale:as.factor(Session)7	0.105441	0.341314	0.308927	-0.563522	0.774405			Fixed Effects			TypeCSS:SexMale:as.factor(Session)7	0.168026	0.233636	0.71918	-0.28989	0.625944			Fixed Effects			TypeCSS:SexMale:as.factor(Session)7	-0.798198	1.01762	-0.784378	-2.7927	1.1963			Fixed Effects
TypeCSR:SexMale:as.factor(Session)8	0.2	0.23009	0.869226	-0.250967	0.650967			Fixed Effects			TypeCSR:SexMale:as.factor(Session)8	0.107054	0.336131	0.318489	-0.551751	0.765859			Fixed Effects			TypeCSR:SexMale:as.factor(Session)8	0.2	0.23009	0.869226	-0.25097	0.650967			Fixed Effects			TypeCSR:SexMale:as.factor(Session)8	-1.30668	1.00217	-1.30385	-3.27089	0.657538			Fixed Effects
TypeCSR:SexMale:as.factor(Session)9	0.127027	0.23009	0.552076	-0.32394	0.577995			Fixed Effects			TypeCSR:SexMale:as.factor(Session)9	-0.110243	0.336131	-0.327977	-0.769048	0.548562			Fixed Effects			TypeCSR:SexMale:as.factor(Session)9	0.127027	0.23009	0.552076	-0.32394	0.577995			Fixed Effects			TypeCSR:SexMale:as.factor(Session)9	-0.104324	1.00217	-0.104099	-2.06854	1.85989			Fixed Effects
TypeCSR:SexMale:as.factor(Session)10	-0.121622	0.23009	-0.528584	-0.572589	0.329346			Fixed Effects			TypeCSR:SexMale:as.factor(Session)10	-0.337054	0.336131	-1.00275	-0.995859	0.321751			Fixed Effects			TypeCSR:SexMale:as.factor(Session)10	-0.12162	0.23009	-0.52858	-0.57259	0.329346			Fixed Effects			TypeCSR:SexMale:as.factor(Session)10	0.630595	1.00217	0.62923	-1.33362	2.59481			Fixed Effects
TypeCSS:SexMale:as.factor(Session)10	-0.00540541	0.23009	-0.0234926	-0.456373	0.445562			Fixed Effects			TypeCSS:SexMale:as.factor(Session)10	-0.0501622	0.336131	-0.149234	-0.708967	0.608643			Fixed Effects			TypeCSS:SexMale:as.factor(Session)10	-0.00541	0.23009	-0.02349	-0.45637	0.445562			Fixed Effects			TypeCSS:SexMale:as.factor(Session)10	-0.486757	1.00217	-0.485704	-2.45097	1.47746			Fixed Effects
TypeCSR:SexMale:as.factor(Session)11	-0.072973	0.23009	-0.31715	-0.52394	0.377995			Fixed Effects			TypeCSR:SexMale:as.factor(Session)11	-0.117649	0.336131	-0.350008	-0.776454	0.541157			Fixed Effects			TypeCSR:SexMale:as.factor(Session)11	-0.07297	0.23009	-0.31715	-0.52394	0.377995			Fixed Effects			TypeCSR:SexMale:as.factor(Session)11	-0.0371081	1.00217	-0.0370278	-2.00132	1.92711			Fixed Effects
TypeCSR:SexMale:as.factor(Session)12	-0.0837838	0.23009	-0.364135	-0.534751	0.367184			Fixed Effects			TypeCSR:SexMale:as.factor(Session)12	0.0975676	0.336131	0.290266	-0.561238	0.756373			Fixed Effects			TypeCSR:SexMale:as.factor(Session)12	-0.08378	0.23009	-0.36414	-0.53475	0.367184			Fixed Effects			TypeCSR:SexMale:as.factor(Session)12	-0.390297	1.00217	-0.389453	-2.35451	1.57392			Fixed Effects
TypeCSR:SexMale:as.factor(Session)13	-0.516216	0.23009	-2.24354	-0.967184	-0.0652487			Fixed Effects			TypeCSR:SexMale:as.factor(Session)13	-0.361216	0.336131	-1.07463	-1.02002	0.297589			Fixed Effects			TypeCSR:SexMale:as.factor(Session)13	-0.51622	0.23009	-2.24354	-0.96718	-0.06525			Fixed Effects			TypeCSR:SexMale:as.factor(Session)13	0.737595	1.00217	0.735999	-1.22662	2.70181			Fixed Effects
TypeCSS:SexMale:as.factor(Session)13	-0.0540541	0.23009	-0.234926	-0.505022	0.396913			Fixed Effects			TypeCSS:SexMale:as.factor(Session)13	-0.0878378	0.336131	-0.26132	-0.746643	0.570967			Fixed Effects			TypeCSS:SexMale:as.factor(Session)13	-0.05405	0.23009	-0.23493	-0.50502	0.396913			Fixed Effects			TypeCSS:SexMale:as.factor(Session)13	-0.0142162	1.00217	-0.0141855	-1.97843	1.95			Fixed Effects
TypeCSR:SexMale:as.factor(Session)14	-0.164865	0.23009	-0.716524	-0.615832	0.286103			Fixed Effects			TypeCSR:SexMale:as.factor(Session)14	-0.410676	0.336131	-1.22177	-1.06948	0.24813			Fixed Effects			TypeCSR:SexMale:as.factor(Session)14	-0.16486	0.23009	-0.71652	-0.61583	0.286103			Fixed Effects			TypeCSR:SexMale:as.factor(Session)14	-0.236784	1.00217	-0.236271	-2.201	1.72743			Fixed Effects
TypeCSR:SexMale:as.factor(Session)15	-0.116216	0.23009	-0.505091	-0.567184	0.334751			Fixed Effects			TypeCSR:SexMale:as.factor(Session)15	-0.144703	0.336131	-0.430495	-0.803508	0.514103			Fixed Effects			TypeCSR:SexMale:as.factor(Session)15	-0.11622	0.23009	-0.50509	-0.56718	0.334751			Fixed Effects			TypeCSR:SexMale:as.factor(Session)15	-0.880054	1.00217	-0.87815	-2.84427	1.08416			Fixed Effects
TypeCSS:SexMale:as.factor(Session)15	0.0864865	0.23009	0.375882	-0.364481	0.537454			Fixed Effects			TypeCSS:SexMale:as.factor(Session)15	-0.195027	0.336131	-0.580211	-0.853832	0.463778			Fixed Effects			TypeCSS:SexMale:as.factor(Session)15	0.086486	0.23009	0.375882	-0.36448	0.537454			Fixed Effects			TypeCSS:SexMale:as.factor(Session)15	-0.601514	1.00217	-0.600212	-2.56573	1.3627			Fixed Effects
TypeCSR:ProtocolAppetitive:as.factor(Session)2	0.0412162	0.385872	0.106813	-0.715079	0.797512			Fixed Effects			TypeCSR:ProtocolAppetitive:as.factor(Session)2	-0.281736	0.563709	-0.49979	-1.38659	0.823114			Fixed Effects			TypeCSR:ProtocolAppetitive:as.factor(Session)2	0.041216	0.385872	0.106813	-0.71508	0.797512			Fixed Effects			TypeCSR:ProtocolAppetitive:as.factor(Session)2	1.02211	1.68069	0.608149	-2.27198	4.31619			Fixed Effects
TypeCSR:ProtocolAppetitive:as.factor(Session)3	-0.257432	0.385872	-0.667144	-1.01373	0.498863			Fixed Effects			TypeCSR:ProtocolAppetitive:as.factor(Session)3	-0.350243	0.563709	-0.621319	-1.45509	0.754607			Fixed Effects			TypeCSR:ProtocolAppetitive:as.factor(Session)3	-0.25743	0.385872	-0.66714	-1.01373	0.498863			Fixed Effects			TypeCSR:ProtocolAppetitive:as.factor(Session)3	2.07844	1.68069	1.23666	-1.21565	5.37252			Fixed Effects
TypeCSR:ProtocolAppetitive:as.factor(Session)4	-0.531081	0.385872	-1.37631	-1.28738	0.225214			Fixed Effects			TypeCSR:ProtocolAppetitive:as.factor(Session)4	-0.400054	0.563709	-0.709681	-1.5049	0.704796			Fixed Effects			TypeCSR:ProtocolAppetitive:as.factor(Session)4	-0.53108	0.385872	-1.37631	-1.28738	0.225214			Fixed Effects			TypeCSR:ProtocolAppetitive:as.factor(Session)4	2.55334	1.68069	1.51922	-0.740749	5.84742			Fixed Effects
TypeCSR:ProtocolAppetitive:as.factor(Session)5	-0.325	0.385872	-0.842248	-1.0813	0.431295			Fixed Effects			TypeCSR:ProtocolAppetitive:as.factor(Session)5	-0.189348	0.563709	-0.335896	-1.2942	0.915502			Fixed Effects			TypeCSR:ProtocolAppetitive:as.factor(Session)5	-0.325	0.385872	-0.84225	-1.0813	0.431295			Fixed Effects			TypeCSR:ProtocolAppetitive:as.factor(Session)5	1.22524	1.68069	0.729009	-2.06885	4.51932			Fixed Effects
TypeCSR:ProtocolAppetitive:as.factor(Session)6	-0.439865	0.385872	-1.13992	-1.19616	0.316431			Fixed Effects			TypeCSR:ProtocolAppetitive:as.factor(Session)6	-0.617564	0.563709	-1.09554	-1.72241	0.487286			Fixed Effects			TypeCSR:ProtocolAppetitive:as.factor(Session)6	-0.43986	0.385872	-1.13992	-1.19616	0.316431			Fixed Effects			TypeCSR:ProtocolAppetitive:as.factor(Session)6	2.65754	1.68069	1.58122	-0.636549	5.95162			Fixed Effects
TypeCSR:ProtocolAppetitive:as.factor(Session)7	-0.206757	0.385872	-0.535817	-0.963052	0.549539			Fixed Effects			TypeCSR:ProtocolAppetitive:as.factor(Session)7	-0.234105	0.563709	-0.415293	-1.33895	0.870745			Fixed Effects			TypeCSR:ProtocolAppetitive:as.factor(Session)7	-0.20676	0.385872	-0.53582	-0.96305	0.549539			Fixed Effects			TypeCSR:ProtocolAppetitive:as.factor(Session)7	1.07993	1.68069	0.64255	-2.21416	4.37401			Fixed Effects
TypeCSR:ProtocolAppetitive:as.factor(Session)8	-0.399662	0.385872	-1.03574	-1.15596	0.356633			Fixed Effects			TypeCSR:ProtocolAppetitive:as.factor(Session)8	-0.335736	0.563709	-0.595584	-1.44059	0.769114			Fixed Effects			TypeCSR:ProtocolAppetitive:as.factor(Session)8	-0.39966	0.385872	-1.03574	-1.15596	0.356633			Fixed Effects			TypeCSR:ProtocolAppetitive:as.factor(Session)8	0.721679	1.68069	0.429395	-2.57241	4.01577			Fixed Effects
TypeCSR:ProtocolAppetitive:as.factor(Session)9	-0.00101351	0.385872	-0.00262655	-0.757309	0.755282			Fixed Effects			TypeCSR:ProtocolAppetitive:as.factor(Session)9	-0.23652	0.563709	-0.419578	-1.34137	0.86833			Fixed Effects			TypeCSR:ProtocolAppetitive:as.factor(Session)9	-0.00101	0.385872	-0.00263	-0.75731	0.755282			Fixed Effects			TypeCSR:ProtocolAppetitive:as.factor(Session)9	0.487409	1.68069	0.290006	-2.80668	3.7815			Fixed Effects
TypeCSR:ProtocolAppetitive:as.factor(Session)10	-0.0385135	0.385872	-0.099809	-0.794809	0.717782			Fixed Effects			TypeCSR:ProtocolAppetitive:as.factor(Session)10	-0.273068	0.563709	-0.484412	-1.37792	0.831782			Fixed Effects			TypeCSR:ProtocolAppetitive:as.factor(Session)10	-0.03851	0.385872	-0.09981	-0.79481	0.717782			Fixed Effects			TypeCSR:ProtocolAppetitive:as.factor(Session)10	0.56278	1.68069	0.334851	-2.73131	3.85687			Fixed Effects
TypeCSR:ProtocolAppetitive:as.factor(Session)11	0.00641892	0.385872	0.0166348	-0.749877	0.762714			Fixed Effects			TypeCSR:ProtocolAppetitive:as.factor(Session)11	-0.175784	0.563709	-0.311834	-1.28063	0.929066			Fixed Effects			TypeCSR:ProtocolAppetitive:as.factor(Session)11	0.006419	0.385872	0.016635	-0.74988	0.762714			Fixed Effects			TypeCSR:ProtocolAppetitive:as.factor(Session)11	0.335946	1.68069	0.199886	-2.95814	3.63003			Fixed Effects
TypeCSR:ProtocolAppetitive:as.factor(Session)12	0.176351	0.385872	0.45702	-0.579944	0.932647			Fixed Effects			TypeCSR:ProtocolAppetitive:as.factor(Session)12	-0.135301	0.563709	-0.240019	-1.24015	0.969549			Fixed Effects			TypeCSR:ProtocolAppetitive:as.factor(Session)12	0.176351	0.385872	0.45702	-0.57994	0.932647			Fixed Effects			TypeCSR:ProtocolAppetitive:as.factor(Session)12	0.196909	1.68069	0.11716	-3.09718	3.491			Fixed Effects
TypeCSR:ProtocolAppetitive:as.factor(Session)13	-0.217568	0.385872	-0.563833	-0.973863	0.538728			Fixed Effects			TypeCSR:ProtocolAppetitive:as.factor(Session)13	-0.8085	0.563709	-1.43425	-1.91335	0.29635			Fixed Effects			TypeCSR:ProtocolAppetitive:as.factor(Session)13	-0.21757	0.385872	-0.56383	-0.97386	0.538728			Fixed Effects			TypeCSR:ProtocolAppetitive:as.factor(Session)13	1.88346	1.68069	1.12065	-1.41062	5.17755			Fixed Effects
TypeCSR:ProtocolAppetitive:as.factor(Session)14	0.915878	0.385872	2.37353	0.159583	1.67217			Fixed Effects			TypeCSR:ProtocolAppetitive:as.factor(Session)14	-0.450537	0.563709	-0.799237	-1.55539	0.654313			Fixed Effects			TypeCSR:ProtocolAppetitive:as.factor(Session)14	0.915878	0.385872	2.37353	0.159583	1.67217			Fixed Effects			TypeCSR:ProtocolAppetitive:as.factor(Session)14	0.069527	1.68069	0.0413682	-3.22456	3.36361			Fixed Effects
TypeCSR:ProtocolAppetitive:as.factor(Session)15	-0.189527	0.385872	-0.491165	-0.945822	0.566768			Fixed Effects			TypeCSR:ProtocolAppetitive:as.factor(Session)15	-0.354314	0.563709	-0.628541	-1.45916	0.750536			Fixed Effects			TypeCSR:ProtocolAppetitive:as.factor(Session)15	-0.18953	0.385872	-0.49117	-0.94582	0.566768			Fixed Effects			TypeCSR:ProtocolAppetitive:as.factor(Session)15	1.04048	1.68069	0.619082	-2.2536	4.33457			Fixed Effects
SexMale:ProtocolAppetitive:as.factor(Session)2	-0.405743	0.385872	-1.0515	-1.16204	0.350552			Fixed Effects			SexMale:ProtocolAppetitive:as.factor(Session)2	-0.830111	0.563709	-1.47259	-1.93496	0.274739			Fixed Effects			SexMale:ProtocolAppetitive:as.factor(Session)2	-0.40574	0.385872	-1.0515	-1.16204	0.350552			Fixed Effects			SexMale:ProtocolAppetitive:as.factor(Session)2	1.98889	1.68069	1.18338	-1.3052	5.28297			Fixed Effects
SexMale:ProtocolAppetitive:as.factor(Session)3	-0.390541	0.385872	-1.0121	-1.14684	0.365755			Fixed Effects			SexMale:ProtocolAppetitive:as.factor(Session)3	-0.80149	0.563709	-1.42181	-1.90634	0.30336			Fixed Effects			SexMale:ProtocolAppetitive:as.factor(Session)3	-0.39054	0.385872	-1.0121	-1.14684	0.365755			Fixed Effects			SexMale:ProtocolAppetitive:as.factor(Session)3	2.46856	1.68069	1.46878	-0.825529	5.76264			Fixed Effects
SexMale:ProtocolAppetitive:as.factor(Session)4	-0.728716	0.385872	-1.88849	-1.48501	0.0275792			Fixed Effects			SexMale:ProtocolAppetitive:as.factor(Session)4	-1.24336	0.563709	-2.20567	-2.34821	-0.138508			Fixed Effects			SexMale:ProtocolAppetitive:as.factor(Session)4	-0.72872	0.385872	-1.88849	-1.48501	0.027579			Fixed Effects			SexMale:ProtocolAppetitive:as.factor(Session)4	3.73799	1.68069	2.22409	0.443907	7.03208			Fixed Effects
SexMale:ProtocolAppetitive:as.factor(Session)5	-0.0324324	0.385872	-0.0840497	-0.788728	0.723863			Fixed Effects			SexMale:ProtocolAppetitive:as.factor(Session)5	-0.760216	0.563709	-1.3486	-1.86507	0.344634			Fixed Effects			SexMale:ProtocolAppetitive:as.factor(Session)5	-0.03243	0.385872	-0.08405	-0.78873	0.723863			Fixed Effects			SexMale:ProtocolAppetitive:as.factor(Session)5	0.994997	1.68069	0.592018	-2.29909	4.28908			Fixed Effects
SexMale:ProtocolAppetitive:as.factor(Session)6	-0.493243	0.385872	-1.27826	-1.24954	0.263052			Fixed Effects			SexMale:ProtocolAppetitive:as.factor(Session)6	-1.42166	0.563709	-2.52198	-2.52651	-0.316812			Fixed Effects			SexMale:ProtocolAppetitive:as.factor(Session)6	-0.49324	0.385872	-1.27826	-1.24954	0.263052			Fixed Effects			SexMale:ProtocolAppetitive:as.factor(Session)6	3.53589	1.68069	2.10383	0.241799	6.82997			Fixed Effects
SexMale:ProtocolAppetitive:as.factor(Session)7	-0.136486	0.385872	-0.353709	-0.892782	0.619809			Fixed Effects			SexMale:ProtocolAppetitive:as.factor(Session)7	-0.959162	0.563709	-1.70152	-2.06401	0.145688			Fixed Effects			SexMale:ProtocolAppetitive:as.factor(Session)7	-0.13649	0.385872	-0.35371	-0.89278	0.619809			Fixed Effects			SexMale:ProtocolAppetitive:as.factor(Session)7	1.65458	1.68069	0.984467	-1.63951	4.94867			Fixed Effects
SexMale:ProtocolAppetitive:as.factor(Session)8	-0.413514	0.385872	-1.07163	-1.16981	0.342782			Fixed Effects			SexMale:ProtocolAppetitive:as.factor(Session)8	-0.792581	0.563709	-1.40601	-1.89743	0.312269			Fixed Effects			SexMale:ProtocolAppetitive:as.factor(Session)8	-0.41351	0.385872	-1.07163	-1.16981	0.342782			Fixed Effects			SexMale:ProtocolAppetitive:as.factor(Session)8	2.07289	1.68069	1.23336	-1.2212	5.36697			Fixed Effects
SexMale:ProtocolAppetitive:as.factor(Session)9	0.0783784	0.385872	0.20312	-0.677917	0.834674			Fixed Effects			SexMale:ProtocolAppetitive:as.factor(Session)9	-0.67523	0.563709	-1.19783	-1.78008	0.42962			Fixed Effects			SexMale:ProtocolAppetitive:as.factor(Session)9	0.078378	0.385872	0.20312	-0.67792	0.834674			Fixed Effects			SexMale:ProtocolAppetitive:as.factor(Session)9	0.459395	1.68069	0.273338	-2.83469	3.75348			Fixed Effects
SexMale:ProtocolAppetitive:as.factor(Session)10	-0.131757	0.385872	-0.341452	-0.888052	0.624539			Fixed Effects			SexMale:ProtocolAppetitive:as.factor(Session)10	-0.727635	0.563709	-1.2908	-1.83249	0.377215			Fixed Effects			SexMale:ProtocolAppetitive:as.factor(Session)10	-0.13176	0.385872	-0.34145	-0.88805	0.624539			Fixed Effects			SexMale:ProtocolAppetitive:as.factor(Session)10	1.36174	1.68069	0.81023	-1.93234	4.65583			Fixed Effects
SexMale:ProtocolAppetitive:as.factor(Session)11	-0.0226351	0.385872	-0.0586597	-0.778931	0.73366			Fixed Effects			SexMale:ProtocolAppetitive:as.factor(Session)11	-0.462946	0.563709	-0.821249	-1.5678	0.641904			Fixed Effects			SexMale:ProtocolAppetitive:as.factor(Session)11	-0.02264	0.385872	-0.05866	-0.77893	0.73366			Fixed Effects			SexMale:ProtocolAppetitive:as.factor(Session)11	0.702115	1.68069	0.417755	-2.59197	3.9962			Fixed Effects
SexMale:ProtocolAppetitive:as.factor(Session)12	0.226689	0.385872	0.587472	-0.529606	0.982985			Fixed Effects			SexMale:ProtocolAppetitive:as.factor(Session)12	0.0165709	0.563709	0.0293963	-1.08828	1.12142			Fixed Effects			SexMale:ProtocolAppetitive:as.factor(Session)12	0.226689	0.385872	0.587472	-0.52961	0.982985			Fixed Effects			SexMale:ProtocolAppetitive:as.factor(Session)12	-0.943223	1.68069	-0.561213	-4.23731	2.35086			Fixed Effects
SexMale:ProtocolAppetitive:as.factor(Session)13	0.206081	0.385872	0.534066	-0.550214	0.962377			Fixed Effects			SexMale:ProtocolAppetitive:as.factor(Session)13	-0.15897	0.563709	-0.282006	-1.26382	0.94588			Fixed Effects			SexMale:ProtocolAppetitive:as.factor(Session)13	0.206081	0.385872	0.534066	-0.55021	0.962377			Fixed Effects			SexMale:ProtocolAppetitive:as.factor(Session)13	-0.28873	1.68069	-0.171793	-3.58282	3.00536			Fixed Effects
SexMale:ProtocolAppetitive:as.factor(Session)14	0.302027	0.385872	0.782713	-0.454268	1.05832			Fixed Effects			SexMale:ProtocolAppetitive:as.factor(Session)14	-0.301635	0.563709	-0.53509	-1.40649	0.803215			Fixed Effects			SexMale:ProtocolAppetitive:as.factor(Session)14	0.302027	0.385872	0.782713	-0.45427	1.05832			Fixed Effects			SexMale:ProtocolAppetitive:as.factor(Session)14	-1.61992	1.68069	-0.963845	-4.91401	1.67416			Fixed Effects
SexMale:ProtocolAppetitive:as.factor(Session)15	0.117568	0.385872	0.30468	-0.638728	0.873863			Fixed Effects			SexMale:ProtocolAppetitive:as.factor(Session)15	-0.159307	0.563709	-0.282606	-1.26416	0.945543			Fixed Effects			SexMale:ProtocolAppetitive:as.factor(Session)15	0.117568	0.385872	0.30468	-0.63873	0.873863			Fixed Effects			SexMale:ProtocolAppetitive:as.factor(Session)15	0.628861	1.68069	0.374169	-2.66522	3.92295			Fixed Effects
TypeCSR:SexMale:ProtocolAppetitive:as.factor(Session)2	0.0125	0.545706	0.0229061	-1.05706	1.08206			Fixed Effects			TypeCSR:SexMale:ProtocolAppetitive:as.factor(Session)2	-0.00866554	0.797205	-0.0108699	-1.57116	1.55383			Fixed Effects			TypeCSR:SexMale:ProtocolAppetitive:as.factor(Session)2	0.0125	0.545706	0.022906	-1.05706	1.08206			Fixed Effects			TypeCSR:SexMale:ProtocolAppetitive:as.factor(Session)2	-0.197824	2.37685	-0.0832296	-4.85637	4.46072			Fixed Effects
TypeCSR:SexMale:ProtocolAppetitive:as.factor(Session)3	0.520608	0.545706	0.954009	-0.548955	1.59017			Fixed Effects			TypeCSR:SexMale:ProtocolAppetitive:as.factor(Session)3	0.258389	0.797205	0.324118	-1.30411	1.82088			Fixed Effects			TypeCSR:SexMale:ProtocolAppetitive:as.factor(Session)3	0.520608	0.545706	0.954009	-0.54896	1.59017			Fixed Effects			TypeCSR:SexMale:ProtocolAppetitive:as.factor(Session)3	-1.98209	2.37685	-0.833914	-6.64063	2.67645			Fixed Effects
TypeCSR:SexMale:ProtocolAppetitive:as.factor(Session)4	0.760473	0.545706	1.39356	-0.30909	1.83004			Fixed Effects			TypeCSR:SexMale:ProtocolAppetitive:as.factor(Session)4	0.623541	0.797205	0.782158	-0.938953	2.18603			Fixed Effects			TypeCSR:SexMale:ProtocolAppetitive:as.factor(Session)4	0.760473	0.545706	1.39356	-0.30909	1.83004			Fixed Effects			TypeCSR:SexMale:ProtocolAppetitive:as.factor(Session)4	-3.05706	2.37685	-1.28618	-7.7156	1.60148			Fixed Effects
TypeCSR:SexMale:ProtocolAppetitive:as.factor(Session)5	0.445608	0.545706	0.816572	-0.623955	1.51517			Fixed Effects			TypeCSR:SexMale:ProtocolAppetitive:as.factor(Session)5	0.672314	0.797205	0.843339	-0.89018	2.23481			Fixed Effects			TypeCSR:SexMale:ProtocolAppetitive:as.factor(Session)5	0.445608	0.545706	0.816572	-0.62396	1.51517			Fixed Effects			TypeCSR:SexMale:ProtocolAppetitive:as.factor(Session)5	-2.12177	2.37685	-0.89268	-6.78031	2.53677			Fixed Effects
TypeCSR:SexMale:ProtocolAppetitive:as.factor(Session)6	0.521959	0.545706	0.956485	-0.547604	1.59152			Fixed Effects			TypeCSR:SexMale:ProtocolAppetitive:as.factor(Session)6	1.13179	0.797205	1.41969	-0.430707	2.69428			Fixed Effects			TypeCSR:SexMale:ProtocolAppetitive:as.factor(Session)6	0.521959	0.545706	0.956485	-0.5476	1.59152			Fixed Effects			TypeCSR:SexMale:ProtocolAppetitive:as.factor(Session)6	-2.92939	2.37685	-1.23247	-7.58793	1.72915			Fixed Effects
TypeCSR:SexMale:ProtocolAppetitive:as.factor(Session)7	0.563851	0.545706	1.03325	-0.505712	1.63341			Fixed Effects			TypeCSR:SexMale:ProtocolAppetitive:as.factor(Session)7	0.970105	0.797205	1.21688	-0.592389	2.5326			Fixed Effects			TypeCSR:SexMale:ProtocolAppetitive:as.factor(Session)7	0.563851	0.545706	1.03325	-0.50571	1.63342			Fixed Effects			TypeCSR:SexMale:ProtocolAppetitive:as.factor(Session)7	-2.29434	2.37685	-0.965285	-6.95288	2.3642			Fixed Effects
TypeCSR:SexMale:ProtocolAppetitive:as.factor(Session)8	0.7625	0.545706	1.39727	-0.307063	1.83206			Fixed Effects			TypeCSR:SexMale:ProtocolAppetitive:as.factor(Session)8	0.727196	0.797205	0.912181	-0.835298	2.28969			Fixed Effects			TypeCSR:SexMale:ProtocolAppetitive:as.factor(Session)8	0.7625	0.545706	1.39727	-0.30706	1.83206			Fixed Effects			TypeCSR:SexMale:ProtocolAppetitive:as.factor(Session)8	-0.884699	2.37685	-0.372215	-5.54324	3.77384			Fixed Effects
TypeCSR:SexMale:ProtocolAppetitive:as.factor(Session)9	0.047973	0.545706	0.08791	-1.02159	1.11754			Fixed Effects			TypeCSR:SexMale:ProtocolAppetitive:as.factor(Session)9	0.295618	0.797205	0.370818	-1.26688	1.85811			Fixed Effects			TypeCSR:SexMale:ProtocolAppetitive:as.factor(Session)9	0.047973	0.545706	0.08791	-1.02159	1.11754			Fixed Effects			TypeCSR:SexMale:ProtocolAppetitive:as.factor(Session)9	0.228574	2.37685	0.0961669	-4.42997	4.88712			Fixed Effects
TypeCSR:SexMale:ProtocolAppetitive:as.factor(Session)10	0.334122	0.545706	0.612275	-0.735442	1.40368			Fixed Effects			TypeCSR:SexMale:ProtocolAppetitive:as.factor(Session)10	0.874554	0.797205	1.09702	-0.68794	2.43705			Fixed Effects			TypeCSR:SexMale:ProtocolAppetitive:as.factor(Session)10	0.334122	0.545706	0.612275	-0.73544	1.40369			Fixed Effects			TypeCSR:SexMale:ProtocolAppetitive:as.factor(Session)10	-1.30197	2.37685	-0.547771	-5.96051	3.35657			Fixed Effects
TypeCSR:SexMale:ProtocolAppetitive:as.factor(Session)11	0.747973	0.545706	1.37065	-0.32159	1.81754			Fixed Effects			TypeCSR:SexMale:ProtocolAppetitive:as.factor(Session)11	0.837899	0.797205	1.05104	-0.724595	2.40039			Fixed Effects			TypeCSR:SexMale:ProtocolAppetitive:as.factor(Session)11	0.747973	0.545706	1.37065	-0.32159	1.81754			Fixed Effects			TypeCSR:SexMale:ProtocolAppetitive:as.factor(Session)11	-1.88114	2.37685	-0.791443	-6.53968	2.7774			Fixed Effects
TypeCSR:SexMale:ProtocolAppetitive:as.factor(Session)12	0.283784	0.545706	0.520031	-0.78578	1.35335			Fixed Effects			TypeCSR:SexMale:ProtocolAppetitive:as.factor(Session)12	0.418182	0.797205	0.52456	-1.14431	1.98068			Fixed Effects			TypeCSR:SexMale:ProtocolAppetitive:as.factor(Session)12	0.283784	0.545706	0.520031	-0.78578	1.35335			Fixed Effects			TypeCSR:SexMale:ProtocolAppetitive:as.factor(Session)12	-1.12995	2.37685	-0.475399	-5.78849	3.52859			Fixed Effects
TypeCSR:SexMale:ProtocolAppetitive:as.factor(Session)13	0.441216	0.545706	0.808524	-0.628347	1.51078			Fixed Effects			TypeCSR:SexMale:ProtocolAppetitive:as.factor(Session)13	0.851716	0.797205	1.06838	-0.710778	2.41421			Fixed Effects			TypeCSR:SexMale:ProtocolAppetitive:as.factor(Session)13	0.441216	0.545706	0.808524	-0.62835	1.51078			Fixed Effects			TypeCSR:SexMale:ProtocolAppetitive:as.factor(Session)13	-1.95084	2.37685	-0.820769	-6.60939	2.7077			Fixed Effects
TypeCSR:SexMale:ProtocolAppetitive:as.factor(Session)14	-0.147635	0.545706	-0.27054	-1.2172	0.921928			Fixed Effects			TypeCSR:SexMale:ProtocolAppetitive:as.factor(Session)14	1.19843	0.797205	1.50328	-0.364068	2.76092			Fixed Effects			TypeCSR:SexMale:ProtocolAppetitive:as.factor(Session)14	-0.14764	0.545706	-0.27054	-1.2172	0.921928			Fixed Effects			TypeCSR:SexMale:ProtocolAppetitive:as.factor(Session)14	-0.484591	2.37685	-0.20388	-5.14313	4.17395			Fixed Effects
TypeCSR:SexMale:ProtocolAppetitive:as.factor(Session)15	0.616216	0.545706	1.12921	-0.453347	1.68578			Fixed Effects			TypeCSR:SexMale:ProtocolAppetitive:as.factor(Session)15	0.605953	0.797205	0.760096	-0.956541	2.16845			Fixed Effects			TypeCSR:SexMale:ProtocolAppetitive:as.factor(Session)15	0.616216	0.545706	1.12921	-0.45335	1.68578			Fixed Effects			TypeCSR:SexMale:ProtocolAppetitive:as.factor(Session)15	-1.99832	2.37685	-0.840743	-6.65686	2.66022			Fixed Effects
(Intercept)	0.0529454	0.0773812				ID	201	Random Effects			(Intercept)	-0.000553546	0.114003				ID	201	Random Effects			(Intercept)	0.052945	0.077381				ID	201	Random Effects			(Intercept)	-0.45561	0.339258				ID	201	Random Effects
(Intercept)	0.0945186	0.0773812				ID	202	Random Effects			(Intercept)	-0.158587	0.114003				ID	202	Random Effects			(Intercept)	0.094519	0.077381				ID	202	Random Effects			(Intercept)	-0.0173615	0.339258				ID	202	Random Effects
(Intercept)	0.346404	0.0773812				ID	203	Random Effects			(Intercept)	0.439971	0.114003				ID	203	Random Effects			(Intercept)	0.346404	0.077381				ID	203	Random Effects			(Intercept)	-1.1594	0.339258				ID	203	Random Effects
(Intercept)	0.143428	0.0773812				ID	204	Random Effects			(Intercept)	-0.194601	0.114003				ID	204	Random Effects			(Intercept)	0.143428	0.077381				ID	204	Random Effects			(Intercept)	-0.722098	0.339258				ID	204	Random Effects
(Intercept)	0.108387	0.0773812				ID	205	Random Effects			(Intercept)	-0.135529	0.114003				ID	205	Random Effects			(Intercept)	0.108387	0.077381				ID	205	Random Effects			(Intercept)	-0.258562	0.339258				ID	205	Random Effects
(Intercept)	0.152406	0.0773812				ID	206	Random Effects			(Intercept)	0.445072	0.114003				ID	206	Random Effects			(Intercept)	0.152406	0.077381				ID	206	Random Effects			(Intercept)	-0.970955	0.339258				ID	206	Random Effects
(Intercept)	0.115724	0.0773812				ID	207	Random Effects			(Intercept)	0.309174	0.114003				ID	207	Random Effects			(Intercept)	0.115724	0.077381				ID	207	Random Effects			(Intercept)	-0.511447	0.339258				ID	207	Random Effects
(Intercept)	0.152406	0.0773812				ID	208	Random Effects			(Intercept)	0.85702	0.114003				ID	208	Random Effects			(Intercept)	0.152406	0.077381				ID	208	Random Effects			(Intercept)	-0.659025	0.339258				ID	208	Random Effects
(Intercept)	-0.0884828	0.0783451				ID	211	Random Effects			(Intercept)	-0.114458	0.115448				ID	211	Random Effects			(Intercept)	-0.08848	0.078345				ID	211	Random Effects			(Intercept)	0.583826	0.34354				ID	211	Random Effects
(Intercept)	-0.289026	0.0783451				ID	212	Random Effects			(Intercept)	-0.380587	0.115448				ID	212	Random Effects			(Intercept)	-0.28903	0.078345				ID	212	Random Effects			(Intercept)	1.81894	0.34354				ID	212	Random Effects
(Intercept)	0.0168023	0.0783451				ID	213	Random Effects			(Intercept)	-0.106551	0.115448				ID	213	Random Effects			(Intercept)	0.016802	0.078345				ID	213	Random Effects			(Intercept)	0.324822	0.34354				ID	213	Random Effects
(Intercept)	-0.166193	0.0783451				ID	214	Random Effects			(Intercept)	-0.307895	0.115448				ID	214	Random Effects			(Intercept)	-0.16619	0.078345				ID	214	Random Effects			(Intercept)	0.91011	0.34354				ID	214	Random Effects
(Intercept)	0.16477	0.0783451				ID	215	Random Effects			(Intercept)	0.428622	0.115448				ID	215	Random Effects			(Intercept)	0.16477	0.078345				ID	215	Random Effects			(Intercept)	-1.3325	0.34354				ID	215	Random Effects
(Intercept)	-0.0783879	0.0783451				ID	216	Random Effects			(Intercept)	-0.146077	0.115448				ID	216	Random Effects			(Intercept)	-0.07839	0.078345				ID	216	Random Effects			(Intercept)	0.616079	0.34354				ID	216	Random Effects
(Intercept)	0.0770329	0.0783451				ID	217	Random Effects			(Intercept)	0.316141	0.115448				ID	217	Random Effects			(Intercept)	0.077033	0.078345				ID	217	Random Effects			(Intercept)	-0.944046	0.34354				ID	217	Random Effects
(Intercept)	-0.0157182	0.0783451				ID	218	Random Effects			(Intercept)	-0.129753	0.115448				ID	218	Random Effects			(Intercept)	-0.01572	0.078345				ID	218	Random Effects			(Intercept)	0.0792935	0.34354				ID	218	Random Effects
(Intercept)	0.50536	0.0773812				ID	221	Random Effects			(Intercept)	0.933746	0.114003				ID	221	Random Effects			(Intercept)	0.50536	0.077381				ID	221	Random Effects			(Intercept)	-1.72742	0.339258				ID	221	Random Effects
(Intercept)	-0.0644379	0.0773812				ID	222	Random Effects			(Intercept)	-0.0545745	0.114003				ID	222	Random Effects			(Intercept)	-0.06444	0.077381				ID	222	Random Effects			(Intercept)	0.50424	0.339258				ID	222	Random Effects
(Intercept)	-0.113348	0.0773812				ID	223	Random Effects			(Intercept)	-0.0673088	0.114003				ID	223	Random Effects			(Intercept)	-0.11335	0.077381				ID	223	Random Effects			(Intercept)	0.349923	0.339258				ID	223	Random Effects
(Intercept)	-0.152475	0.0773812				ID	224	Random Effects			(Intercept)	-0.0622101	0.114003				ID	224	Random Effects			(Intercept)	-0.15248	0.077381				ID	224	Random Effects			(Intercept)	0.918033	0.339258				ID	224	Random Effects
(Intercept)	0.0448045	0.0773812				ID	225	Random Effects			(Intercept)	-0.113493	0.114003				ID	225	Random Effects			(Intercept)	0.044805	0.077381				ID	225	Random Effects			(Intercept)	0.290518	0.339258				ID	225	Random Effects
(Intercept)	0.0765958	0.0773812				ID	226	Random Effects			(Intercept)	0.108486	0.114003				ID	226	Random Effects			(Intercept)	0.076596	0.077381				ID	226	Random Effects			(Intercept)	-0.398533	0.339258				ID	226	Random Effects
(Intercept)	-0.167953	0.0773812				ID	227	Random Effects			(Intercept)	-0.286449	0.114003				ID	227	Random Effects			(Intercept)	-0.16795	0.077381				ID	227	Random Effects			(Intercept)	1.18996	0.339258				ID	227	Random Effects
(Intercept)	0.0839323	0.0773812				ID	228	Random Effects			(Intercept)	0.247244	0.114003				ID	228	Random Effects			(Intercept)	0.083932	0.077381				ID	228	Random Effects			(Intercept)	0.123837	0.339258				ID	228	Random Effects
(Intercept)	-0.159812	0.0773812				ID	231	Random Effects			(Intercept)	-0.310403	0.114003				ID	231	Random Effects			(Intercept)	-0.15981	0.077381				ID	231	Random Effects			(Intercept)	0.539276	0.339258				ID	231	Random Effects
(Intercept)	-0.135357	0.0773812				ID	232	Random Effects			(Intercept)	-0.10974	0.114003				ID	232	Random Effects			(Intercept)	-0.13536	0.077381				ID	232	Random Effects			(Intercept)	0.622654	0.339258				ID	232	Random Effects
(Intercept)	0.495578	0.0773812				ID	233	Random Effects			(Intercept)	0.0958983	0.114003				ID	233	Random Effects			(Intercept)	0.495578	0.077381				ID	233	Random Effects			(Intercept)	-1.37542	0.339258				ID	233	Random Effects
(Intercept)	0.00403566	0.0773812				ID	234	Random Effects			(Intercept)	0.309893	0.114003				ID	234	Random Effects			(Intercept)	0.004036	0.077381				ID	234	Random Effects			(Intercept)	0.0282052	0.339258				ID	234	Random Effects
(Intercept)	-0.158171	0.0773812				ID	235	Random Effects			(Intercept)	-0.213999	0.114003				ID	235	Random Effects			(Intercept)	-0.15817	0.077381				ID	235	Random Effects			(Intercept)	0.554999	0.339258				ID	235	Random Effects
(Intercept)	-0.0407874	0.0773812				ID	236	Random Effects			(Intercept)	0.139799	0.114003				ID	236	Random Effects			(Intercept)	-0.04079	0.077381				ID	236	Random Effects			(Intercept)	-0.0377409	0.339258				ID	236	Random Effects
(Intercept)	-0.0676877	0.0773812				ID	237	Random Effects			(Intercept)	-0.198976	0.114003				ID	237	Random Effects			(Intercept)	-0.06769	0.077381				ID	237	Random Effects			(Intercept)	0.332071	0.339258				ID	237	Random Effects
(Intercept)	-0.0823607	0.0773812				ID	238	Random Effects			(Intercept)	0.215309	0.114003				ID	238	Random Effects			(Intercept)	-0.08236	0.077381				ID	238	Random Effects			(Intercept)	0.33938	0.339258				ID	238	Random Effects
(Intercept)	0.221684	0.0773812				ID	241	Random Effects			(Intercept)	0.940809	0.114003				ID	241	Random Effects			(Intercept)	0.221684	0.077381				ID	241	Random Effects			(Intercept)	-1.87777	0.339258				ID	241	Random Effects
(Intercept)	0.118973	0.0773812				ID	242	Random Effects			(Intercept)	0.342425	0.114003				ID	242	Random Effects			(Intercept)	0.118973	0.077381				ID	242	Random Effects			(Intercept)	-0.634953	0.339258				ID	242	Random Effects
(Intercept)	-0.0693289	0.0773812				ID	243	Random Effects			(Intercept)	-0.153588	0.114003				ID	243	Random Effects			(Intercept)	-0.06933	0.077381				ID	243	Random Effects			(Intercept)	0.177418	0.339258				ID	243	Random Effects
(Intercept)	-0.0571015	0.0773812				ID	244	Random Effects			(Intercept)	-0.151897	0.114003				ID	244	Random Effects			(Intercept)	-0.0571	0.077381				ID	244	Random Effects			(Intercept)	-0.36071	0.339258				ID	244	Random Effects
(Intercept)	-0.226644	0.0773812				ID	245	Random Effects			(Intercept)	-0.418741	0.114003				ID	245	Random Effects			(Intercept)	-0.22664	0.077381				ID	245	Random Effects			(Intercept)	1.38526	0.339258				ID	245	Random Effects
(Intercept)	0.00567679	0.0773812				ID	246	Random Effects			(Intercept)	-0.0511895	0.114003				ID	246	Random Effects			(Intercept)	0.005677	0.077381				ID	246	Random Effects			(Intercept)	-0.155213	0.339258				ID	246	Random Effects
(Intercept)	-0.101925	0.0773812				ID	247	Random Effects			(Intercept)	-0.0571338	0.114003				ID	247	Random Effects			(Intercept)	-0.10192	0.077381				ID	247	Random Effects			(Intercept)	0.404695	0.339258				ID	247	Random Effects
(Intercept)	-0.128825	0.0773812				ID	248	Random Effects			(Intercept)	0.0323291	0.114003				ID	248	Random Effects			(Intercept)	-0.12882	0.077381				ID	248	Random Effects			(Intercept)	0.729931	0.339258				ID	248	Random Effects
(Intercept)	-0.152475	0.0773812				ID	251	Random Effects			(Intercept)	-0.128045	0.114003				ID	251	Random Effects			(Intercept)	-0.15248	0.077381				ID	251	Random Effects			(Intercept)	0.85641	0.339258				ID	251	Random Effects
(Intercept)	0.121419	0.0773812				ID	252	Random Effects			(Intercept)	0.676624	0.114003				ID	252	Random Effects			(Intercept)	0.121419	0.077381				ID	252	Random Effects			(Intercept)	-1.0457	0.339258				ID	252	Random Effects
(Intercept)	-0.130466	0.0773812				ID	253	Random Effects			(Intercept)	-0.286203	0.114003				ID	253	Random Effects			(Intercept)	-0.13047	0.077381				ID	253	Random Effects			(Intercept)	0.294296	0.339258				ID	253	Random Effects
(Intercept)	-0.242958	0.0773812				ID	254	Random Effects			(Intercept)	-0.390589	0.114003				ID	254	Random Effects			(Intercept)	-0.24296	0.077381				ID	254	Random Effects			(Intercept)	1.18291	0.339258				ID	254	Random Effects
(Intercept)	-0.111706	0.0773812				ID	255	Random Effects			(Intercept)	-0.18266	0.114003				ID	255	Random Effects			(Intercept)	-0.11171	0.077381				ID	255	Random Effects			(Intercept)	0.372409	0.339258				ID	255	Random Effects
(Intercept)	0.052141	0.0773812				ID	256	Random Effects			(Intercept)	-0.0104251	0.114003				ID	256	Random Effects			(Intercept)	0.052141	0.077381				ID	256	Random Effects			(Intercept)	-0.651814	0.339258				ID	256	Random Effects
(Intercept)	0.0227952	0.0773812				ID	257	Random Effects			(Intercept)	-0.109563	0.114003				ID	257	Random Effects			(Intercept)	0.022795	0.077381				ID	257	Random Effects			(Intercept)	0.461065	0.339258				ID	257	Random Effects
(Intercept)	-0.02856	0.0773812				ID	258	Random Effects			(Intercept)	-0.140205	0.114003				ID	258	Random Effects			(Intercept)	-0.02856	0.077381				ID	258	Random Effects			(Intercept)	-0.272463	0.339258				ID	258	Random Effects
(Intercept)	0.586061	0.0773812				ID	261	Random Effects			(Intercept)	0.479666	0.114003				ID	261	Random Effects			(Intercept)	0.586061	0.077381				ID	261	Random Effects			(Intercept)	-1.92946	0.339258				ID	261	Random Effects
(Intercept)	-0.106011	0.0773812				ID	262	Random Effects			(Intercept)	-0.114789	0.114003				ID	262	Random Effects			(Intercept)	-0.10601	0.077381				ID	262	Random Effects			(Intercept)	0.216369	0.339258				ID	262	Random Effects
(Intercept)	0.0138176	0.0773812				ID	263	Random Effects			(Intercept)	0.0943811	0.114003				ID	263	Random Effects			(Intercept)	0.013818	0.077381				ID	263	Random Effects			(Intercept)	-0.443915	0.339258				ID	263	Random Effects
(Intercept)	-0.208722	0.0773812				ID	264	Random Effects			(Intercept)	-0.419714	0.114003				ID	264	Random Effects			(Intercept)	-0.20872	0.077381				ID	264	Random Effects			(Intercept)	1.22724	0.339258				ID	264	Random Effects
(Intercept)	-0.119043	0.0773812				ID	265	Random Effects			(Intercept)	-0.434758	0.114003				ID	265	Random Effects			(Intercept)	-0.11904	0.077381				ID	265	Random Effects			(Intercept)	0.94716	0.339258				ID	265	Random Effects
(Intercept)	-0.116597	0.0773812				ID	266	Random Effects			(Intercept)	-0.00885817	0.114003				ID	266	Random Effects			(Intercept)	-0.1166	0.077381				ID	266	Random Effects			(Intercept)	0.262469	0.339258				ID	266	Random Effects
(Intercept)	-0.233981	0.0773812				ID	267	Random Effects			(Intercept)	-0.421029	0.114003				ID	267	Random Effects			(Intercept)	-0.23398	0.077381				ID	267	Random Effects			(Intercept)	1.26714	0.339258				ID	267	Random Effects
(Intercept)	-0.233981	0.0773812				ID	268	Random Effects			(Intercept)	-0.32117	0.114003				ID	268	Random Effects			(Intercept)	-0.23398	0.077381				ID	268	Random Effects			(Intercept)	1.47213	0.339258				ID	268	Random Effects
(Intercept)	0.177269	0.0825954				ID	311	Random Effects			(Intercept)	-0.091208	0.12183				ID	311	Random Effects			(Intercept)	0.177269	0.082595				ID	311	Random Effects			(Intercept)	-0.666978	0.362452				ID	311	Random Effects
(Intercept)	-0.279661	0.0825954				ID	312	Random Effects			(Intercept)	-0.295261	0.12183				ID	312	Random Effects			(Intercept)	-0.27966	0.082595				ID	312	Random Effects			(Intercept)	1.40515	0.362452				ID	312	Random Effects
(Intercept)	-0.201648	0.0825954				ID	313	Random Effects			(Intercept)	-0.218201	0.12183				ID	313	Random Effects			(Intercept)	-0.20165	0.082595				ID	313	Random Effects			(Intercept)	1.00847	0.362452				ID	313	Random Effects
(Intercept)	-0.30195	0.0825954				ID	314	Random Effects			(Intercept)	-0.319489	0.12183				ID	314	Random Effects			(Intercept)	-0.30195	0.082595				ID	314	Random Effects			(Intercept)	1.49047	0.362452				ID	314	Random Effects
(Intercept)	0.734502	0.0825954				ID	315	Random Effects			(Intercept)	1.04009	0.12183				ID	315	Random Effects			(Intercept)	0.734502	0.082595				ID	315	Random Effects			(Intercept)	-1.3137	0.362452				ID	315	Random Effects
(Intercept)	-0.129208	0.0825954				ID	316	Random Effects			(Intercept)	-0.0755576	0.12183				ID	316	Random Effects			(Intercept)	-0.12921	0.082595				ID	316	Random Effects			(Intercept)	0.598041	0.362452				ID	316	Random Effects
(Intercept)	-0.0261203	0.0825954				ID	317	Random Effects			(Intercept)	0.0721136	0.12183				ID	317	Random Effects			(Intercept)	-0.02612	0.082595				ID	317	Random Effects			(Intercept)	-1.08083	0.362452				ID	317	Random Effects
(Intercept)	0.0268168	0.0825954				ID	318	Random Effects			(Intercept)	-0.112482	0.12183				ID	318	Random Effects			(Intercept)	0.026817	0.082595				ID	318	Random Effects			(Intercept)	-1.44063	0.362452				ID	318	Random Effects
(Intercept)	-0.269561	0.0825954				ID	411	Random Effects			(Intercept)	-0.282167	0.12183				ID	411	Random Effects			(Intercept)	-0.26956	0.082595				ID	411	Random Effects			(Intercept)	1.5271	0.362452				ID	411	Random Effects
(Intercept)	0.078709	0.0825954				ID	412	Random Effects			(Intercept)	0.378817	0.12183				ID	412	Random Effects			(Intercept)	0.078709	0.082595				ID	412	Random Effects			(Intercept)	-0.60018	0.362452				ID	412	Random Effects
(Intercept)	0.270954	0.0825954				ID	413	Random Effects			(Intercept)	-0.207919	0.12183				ID	413	Random Effects			(Intercept)	0.270954	0.082595				ID	413	Random Effects			(Intercept)	-0.137178	0.362452				ID	413	Random Effects
(Intercept)	0.321105	0.0825954				ID	414	Random Effects			(Intercept)	0.241911	0.12183				ID	414	Random Effects			(Intercept)	0.321105	0.082595				ID	414	Random Effects			(Intercept)	-1.24232	0.362452				ID	414	Random Effects
(Intercept)	-0.202693	0.0825954				ID	415	Random Effects			(Intercept)	-0.16912	0.12183				ID	415	Random Effects			(Intercept)	-0.20269	0.082595				ID	415	Random Effects			(Intercept)	0.728105	0.362452				ID	415	Random Effects
(Intercept)	-0.172045	0.0825954				ID	416	Random Effects			(Intercept)	-0.125605	0.12183				ID	416	Random Effects			(Intercept)	-0.17205	0.082595				ID	416	Random Effects			(Intercept)	0.550439	0.362452				ID	416	Random Effects
(Intercept)	-0.160901	0.0825954				ID	417	Random Effects			(Intercept)	-0.0960935	0.12183				ID	417	Random Effects			(Intercept)	-0.1609	0.082595				ID	417	Random Effects			(Intercept)	0.60771	0.362452				ID	417	Random Effects
(Intercept)	0.134432	0.0825954				ID	418	Random Effects			(Intercept)	0.260175	0.12183				ID	418	Random Effects			(Intercept)	0.134432	0.082595				ID	418	Random Effects			(Intercept)	-1.43367	0.362452				ID	418	Random Effects
(Intercept)	-0.128021	0.0773812				ID	551	Random Effects			(Intercept)	-0.277971	0.114003				ID	551	Random Effects			(Intercept)	-0.12802	0.077381				ID	551	Random Effects			(Intercept)	0.489943	0.339258				ID	551	Random Effects
(Intercept)	-0.172039	0.0773812				ID	552	Random Effects			(Intercept)	-0.309184	0.114003				ID	552	Random Effects			(Intercept)	-0.17204	0.077381				ID	552	Random Effects			(Intercept)	0.784752	0.339258				ID	552	Random Effects
(Intercept)	0.0676183	0.0773812				ID	553	Random Effects			(Intercept)	0.16917	0.114003				ID	553	Random Effects			(Intercept)	0.067618	0.077381				ID	553	Random Effects			(Intercept)	-1.10663	0.339258				ID	553	Random Effects
(Intercept)	0.118973	0.0773812				ID	554	Random Effects			(Intercept)	0.230354	0.114003				ID	554	Random Effects			(Intercept)	0.118973	0.077381				ID	554	Random Effects			(Intercept)	-0.411951	0.339258				ID	554	Random Effects
(Intercept)	-0.260077	0.0773812				ID	555	Random Effects			(Intercept)	-0.216787	0.114003				ID	555	Random Effects			(Intercept)	-0.26008	0.077381				ID	555	Random Effects			(Intercept)	1.26371	0.339258				ID	555	Random Effects
(Intercept)	-0.132911	0.0773812				ID	561	Random Effects			(Intercept)	-0.142247	0.114003				ID	561	Random Effects			(Intercept)	-0.13291	0.077381				ID	561	Random Effects			(Intercept)	-0.0311133	0.339258				ID	561	Random Effects
(Intercept)	-0.211167	0.0773812				ID	562	Random Effects			(Intercept)	-0.169406	0.114003				ID	562	Random Effects			(Intercept)	-0.21117	0.077381				ID	562	Random Effects			(Intercept)	0.739111	0.339258				ID	562	Random Effects
(Intercept)	-0.054656	0.0773812				ID	563	Random Effects			(Intercept)	-0.211613	0.114003				ID	563	Random Effects			(Intercept)	-0.05466	0.077381				ID	563	Random Effects			(Intercept)	0.661159	0.339258				ID	563	Random Effects
(Intercept)	0.187447	0.0773812				ID	564	Random Effects			(Intercept)	0.126565	0.114003				ID	564	Random Effects			(Intercept)	0.187447	0.077381				ID	564	Random Effects			(Intercept)	-1.19385	0.339258				ID	564	Random Effects
(Intercept)	-0.00655063	0.0773812				ID	651	Random Effects			(Intercept)	-0.185521	0.114003				ID	651	Random Effects			(Intercept)	-0.00655	0.077381				ID	651	Random Effects			(Intercept)	0.0381789	0.339258				ID	651	Random Effects
(Intercept)	0.30158	0.0773812				ID	652	Random Effects			(Intercept)	0.123384	0.114003				ID	652	Random Effects			(Intercept)	0.30158	0.077381				ID	652	Random Effects			(Intercept)	-1.97412	0.339258				ID	652	Random Effects
(Intercept)	-0.22909	0.0773812				ID	653	Random Effects			(Intercept)	-0.312714	0.114003				ID	653	Random Effects			(Intercept)	-0.22909	0.077381				ID	653	Random Effects			(Intercept)	1.51423	0.339258				ID	653	Random Effects
(Intercept)	0.0912688	0.0773812				ID	654	Random Effects			(Intercept)	-0.260086	0.114003				ID	654	Random Effects			(Intercept)	0.091269	0.077381				ID	654	Random Effects			(Intercept)	-0.761829	0.339258				ID	654	Random Effects
(Intercept)	-0.15328	0.0773812				ID	655	Random Effects			(Intercept)	-0.381533	0.114003				ID	655	Random Effects			(Intercept)	-0.15328	0.077381				ID	655	Random Effects			(Intercept)	1.08411	0.339258				ID	655	Random Effects
(Intercept)	0.135287	0.0773812				ID	661	Random Effects			(Intercept)	0.269255	0.114003				ID	661	Random Effects			(Intercept)	0.135287	0.077381				ID	661	Random Effects			(Intercept)	-0.874965	0.339258				ID	661	Random Effects
(Intercept)	-0.0407874	0.0773812				ID	662	Random Effects			(Intercept)	-0.0210701	0.114003				ID	662	Random Effects			(Intercept)	-0.04079	0.077381				ID	662	Random Effects			(Intercept)	-0.0872721	0.339258				ID	662	Random Effects
(Intercept)	0.260007	0.0773812				ID	663	Random Effects			(Intercept)	0.262839	0.114003				ID	663	Random Effects			(Intercept)	0.260007	0.077381				ID	663	Random Effects			(Intercept)	-1.52155	0.339258				ID	663	Random Effects
(Intercept)	0.497219	0.0773812				ID	664	Random Effects			(Intercept)	0.78626	0.114003				ID	664	Random Effects			(Intercept)	0.497219	0.077381				ID	664	Random Effects			(Intercept)	-2.05289	0.339258				ID	664	Random Effects
nobs	3152							Model Summary			nobs	3152							Model Summary			nobs	3152							Model Summary			nobs	3152							Model Summary
sigma	0.494827							Model Summary			sigma	0.722878							Model Summary			sigma	0.494827							Model Summary			sigma	2.15524							Model Summary
logLik	-2443.68							Model Summary			logLik	-3593.35							Model Summary			logLik	-2443.68							Model Summary			logLik	-6888.91							Model Summary
AIC	5159.37							Model Summary			AIC	7458.7							Model Summary			AIC	5159.37							Model Summary			AIC	14049.8							Model Summary
BIC	5982.96							Model Summary			BIC	8282.28							Model Summary			BIC	5982.95							Model Summary			BIC	14873.4							Model Summary
REMLcrit	4887.37							Model Summary			REMLcrit	7186.7							Model Summary			REMLcrit	4887.37							Model Summary			REMLcrit	13777.8							Model Summary
df.residual	3016							Model Summary			df.residual	3016							Model Summary			df.residual	3016							Model Summary			df.residual	3016							Model Summary

## Sheet: 1b
Fig. 1d, 1e; Fig S3b contrasts (10px, 0.5s)												Fig S3a contrasts (10px, 0.25s)												Fig S3c contrasts (10px, 1s)												Fig S3d contrasts (25px, 0.25s)												Fig S3e contrasts (25px, 0.5s)
contrast	Session	Sex	Condition	estimate	SE	df	t.ratio	p.value				contrast	Session	Sex	Condition	estimate	SE	df	t.ratio	p.value				contrast	Session	Sex	Condition	estimate	SE	df	t.ratio	p.value				contrast	Session	Sex	Condition	estimate	SE	df	t.ratio	p.value				contrast	Session
Contrast: Sex | Protocol												Contrast: Sex | Protocol												Contrast: Sex | Protocol												Contrast: Sex | Protocol												Contrast: Sex | Protocol
CSR - CSS	01	Female	Mixed	-22.404	21.4372	396.011	-1.0451	0.548869				CSR - CSS	01	Female	Mixed	-13.1519	20.11	408.316	-0.654001	0.790204				CSR - CSS	01	Female	Mixed	-30.8561	25.6898	352.774	-1.2011	0.453296				CSR - CSS	01	Female	Mixed	-17.5241	20.3433	409.287	-0.861419	0.664936				CSR - CSS	01
CSR - CSm	01	Female	Mixed	-22.4254	21.4372	396.011	-1.0461	0.548241				CSR - CSm	01	Female	Mixed	-22.2487	19.3908	408.011	-1.14738	0.485513				CSR - CSm	01	Female	Mixed	-14.996	23.3291	352.014	-0.642803	0.796554				CSR - CSm	01	Female	Mixed	-25.8518	19.6155	409.009	-1.31793	0.385983				CSR - CSm	01
CSS - CSm	01	Female	Mixed	-0.0214286	21.4372	396.011	-0.000999599	0.999999				CSS - CSm	01	Female	Mixed	-9.09677	20.11	408.316	-0.452351	0.893388				CSS - CSm	01	Female	Mixed	15.8601	25.6898	352.774	0.617367	0.810714				CSS - CSm	01	Female	Mixed	-8.32771	20.3433	409.287	-0.409359	0.911799				CSS - CSm	01
CSR - CSS	04	Female	Mixed	-48.9269	18.9058	396.011	-2.58793	0.0269943				CSR - CSS	04	Female	Mixed	-59.971	18.2818	408.011	-3.28036	0.0032231				CSR - CSS	04	Female	Mixed	-22.7221	21.2833	352.984	-1.0676	0.534842				CSR - CSS	04	Female	Mixed	-62.2347	18.4937	409.009	-3.36519	0.00240829				CSR - CSS	04
CSR - CSm	04	Female	Mixed	-5.32134	19.5342	396.522	-0.272412	0.959923				CSR - CSm	04	Female	Mixed	-5.00437	18.2818	408.011	-0.273734	0.959541				CSR - CSm	04	Female	Mixed	-10.3684	22.6423	352.408	-0.457923	0.890902				CSR - CSm	04	Female	Mixed	-8.16989	18.4937	409.009	-0.441766	0.898056				CSR - CSm	04
CSS - CSm	04	Female	Mixed	43.6055	19.5342	396.522	2.23227	0.0670762				CSS - CSm	04	Female	Mixed	54.9667	18.2818	408.011	3.00663	0.00788135				CSS - CSm	04	Female	Mixed	12.3536	22.1241	353.337	0.55838	0.842231				CSS - CSm	04	Female	Mixed	54.0648	18.4937	409.009	2.92342	0.0101982				CSS - CSm	04
CSR - CSS	07	Female	Mixed	-52.5635	18.9058	396.011	-2.78028	0.0156692				CSR - CSS	07	Female	Mixed	-75.6181	18.2818	408.011	-4.13624	0.000126782				CSR - CSS	07	Female	Mixed	-16.7123	21.2833	352.984	-0.78523	0.712358				CSR - CSS	07	Female	Mixed	-73.2438	18.4937	409.009	-3.96048	0.000259709				CSR - CSS	07
CSR - CSm	07	Female	Mixed	-5.60238	18.9058	396.011	-0.296331	0.952754				CSR - CSm	07	Female	Mixed	-12.8051	18.2818	408.011	-0.700428	0.763362				CSR - CSm	07	Female	Mixed	-24.6268	22.6457	352.457	-1.08748	0.522461				CSR - CSm	07	Female	Mixed	-4.79383	18.4937	409.009	-0.259214	0.963641				CSR - CSm	07
CSS - CSm	07	Female	Mixed	46.9611	18.9058	396.011	2.48395	0.035682				CSS - CSm	07	Female	Mixed	62.813	18.2818	408.011	3.43581	0.00188068				CSS - CSm	07	Female	Mixed	-7.91448	22.1252	353.342	-0.357714	0.931914				CSS - CSm	07	Female	Mixed	68.45	18.4937	409.009	3.70126	0.000712188				CSS - CSm	07
CSR - CSS	10	Female	Mixed	-65.6	19.5342	396.522	-3.35822	0.00247385				CSR - CSS	10	Female	Mixed	-100.625	18.2818	408.011	-5.5041	1.96736e-07				CSR - CSS	10	Female	Mixed	-37.4413	23.1916	353.642	-1.61443	0.240847				CSR - CSS	10	Female	Mixed	-108.711	18.4937	409.009	-5.87827	2.57916e-08				CSR - CSS	10
CSR - CSm	10	Female	Mixed	-24.8191	20.799	396.346	-1.19329	0.45786				CSR - CSm	10	Female	Mixed	-16.0572	19.6127	408.553	-0.818715	0.691634				CSR - CSm	10	Female	Mixed	-36.8167	25.1983	352.014	-1.46108	0.31102				CSR - CSm	10	Female	Mixed	-14.6236	19.8405	409.503	-0.73706	0.741595				CSR - CSm	10
CSS - CSm	10	Female	Mixed	40.7808	20.2988	396.82	2.00903	0.111339				CSS - CSm	10	Female	Mixed	84.5678	19.6127	408.553	4.31188	6.02514e-05				CSS - CSm	10	Female	Mixed	0.624584	23.1916	353.642	0.0269314	0.9996				CSS - CSm	10	Female	Mixed	94.0872	19.8405	409.503	4.74218	8.71918e-06				CSS - CSm	10
CSR - CSS	13	Female	Mixed	-79.4463	18.9058	396.011	-4.20222	9.67617e-05				CSR - CSS	13	Female	Mixed	-102.922	18.2818	408.011	-5.62975	1.0071e-07				CSR - CSS	13	Female	Mixed	-32.7333	20.5744	352.014	-1.59098	0.250857				CSR - CSS	13	Female	Mixed	-108.805	18.4937	409.009	-5.88336	2.50705e-08				CSR - CSS	13
CSR - CSm	13	Female	Mixed	-17.3759	18.9058	396.011	-0.919079	0.628549				CSR - CSm	13	Female	Mixed	-11.6093	18.2818	408.011	-0.635016	0.800907				CSR - CSm	13	Female	Mixed	-43.1764	24.6028	353.929	-1.75494	0.186482				CSR - CSm	13	Female	Mixed	-11.4494	18.4937	409.009	-0.619097	0.809746				CSR - CSm	13
CSS - CSm	13	Female	Mixed	62.0704	18.9058	396.011	3.28314	0.00320039				CSS - CSm	13	Female	Mixed	91.313	18.2818	408.011	4.99474	2.61494e-06				CSS - CSm	13	Female	Mixed	-10.4431	24.6028	353.929	-0.424468	0.905499				CSS - CSm	13	Female	Mixed	97.3556	18.4937	409.009	5.26426	6.81671e-07				CSS - CSm	13
CSR - CSS	15	Female	Mixed	-106.819	21.2711	397.093	-5.02182	2.31522e-06				CSR - CSS	15	Female	Mixed	-120.75	18.2818	408.011	-6.60491	3.49275e-10				CSR - CSS	15	Female	Mixed	-67.2113	26.5739	354.174	-2.52922	0.0317515				CSR - CSS	15	Female	Mixed	-122.493	18.4937	409.009	-6.62348	3.07996e-10				CSR - CSS	15
CSR - CSm	15	Female	Mixed	-1.40287	21.7612	396.86	-0.0644664	0.997711				CSR - CSm	15	Female	Mixed	0.188889	18.2818	408.011	0.010332	0.999941				CSR - CSm	15	Female	Mixed	-7.00989	28.5905	354.696	-0.245183	0.967407				CSR - CSm	15	Female	Mixed	0.175926	18.4937	409.009	0.00951276	0.99995				CSR - CSm	15
CSS - CSm	15	Female	Mixed	105.417	19.5231	396.312	5.39957	3.45319e-07				CSS - CSm	15	Female	Mixed	120.939	18.2818	408.011	6.61525	3.26502e-10				CSS - CSm	15	Female	Mixed	60.2014	23.1599	353.141	2.59938	0.0262641				CSS - CSm	15	Female	Mixed	122.669	18.4937	409.009	6.633	2.89237e-10				CSS - CSm	15
CSR - CSS	01	Male	Mixed	-12.2861	18.9058	396.011	-0.649859	0.792556				CSR - CSS	01	Male	Mixed	-11.3916	18.2818	408.011	-0.623109	0.807531				CSR - CSS	01	Male	Mixed	-11.5492	22.782	353.709	-0.506945	0.868008				CSR - CSS	01	Male	Mixed	-12.9404	18.4937	409.009	-0.699722	0.763776				CSR - CSS	01
CSR - CSm	01	Male	Mixed	-41.3194	18.9058	396.011	-2.18554	0.0748946				CSR - CSm	01	Male	Mixed	-35.6657	18.2818	408.011	-1.95088	0.125961				CSR - CSm	01	Male	Mixed	-48.2347	21.8224	352.014	-2.21033	0.070814				CSR - CSm	01	Male	Mixed	-34.8127	18.4937	409.009	-1.88241	0.145066				CSR - CSm	01
CSS - CSm	01	Male	Mixed	-29.0333	18.9058	396.011	-1.53568	0.275346				CSS - CSm	01	Male	Mixed	-24.2741	18.2818	408.011	-1.32777	0.380547				CSS - CSm	01	Male	Mixed	-36.6855	22.782	353.709	-1.61028	0.242596				CSS - CSm	01	Male	Mixed	-21.8722	18.4937	409.009	-1.18269	0.464179				CSS - CSm	01
CSR - CSS	04	Male	Mixed	-49.7933	18.9058	396.011	-2.63375	0.0237906				CSR - CSS	04	Male	Mixed	-63.6753	18.2818	408.011	-3.48298	0.0015901				CSR - CSS	04	Male	Mixed	-22.9172	21.2596	352.482	-1.07797	0.528378				CSR - CSS	04	Male	Mixed	-72.3611	18.4937	409.009	-3.91275	0.000314121				CSR - CSS	04
CSR - CSm	04	Male	Mixed	-48.434	18.9058	396.011	-2.56186	0.0289792				CSR - CSm	04	Male	Mixed	-32.8568	18.2818	408.011	-1.79724	0.171773				CSR - CSm	04	Male	Mixed	-53.2658	22.0986	352.831	-2.41037	0.043323				CSR - CSm	04	Male	Mixed	-25.5018	18.4937	409.009	-1.37895	0.352896				CSR - CSm	04
CSS - CSm	04	Male	Mixed	1.35926	18.9058	396.011	0.0718964	0.997154				CSS - CSm	04	Male	Mixed	30.8185	18.2818	408.011	1.68574	0.211873				CSS - CSm	04	Male	Mixed	-30.3486	22.7643	353.39	-1.33317	0.377716				CSS - CSm	04	Male	Mixed	46.8593	18.4937	409.009	2.5338	0.0312263				CSS - CSm	04
CSR - CSS	07	Male	Mixed	-52.1014	18.9058	396.011	-2.75584	0.0168237				CSR - CSS	07	Male	Mixed	-91.8906	18.2818	408.011	-5.02633	2.24068e-06				CSR - CSS	07	Male	Mixed	-26.1157	20.5744	352.014	-1.26933	0.41349				CSR - CSS	07	Male	Mixed	-93.8396	18.4937	409.009	-5.07414	1.76923e-06				CSR - CSS	07
CSR - CSm	07	Male	Mixed	-5.9563	19.5195	396.254	-0.305146	0.949975				CSR - CSm	07	Male	Mixed	-4.46283	18.2818	408.011	-0.244113	0.967686				CSR - CSm	07	Male	Mixed	-22.097	23.18	353.397	-0.953279	0.606922				CSR - CSm	07	Male	Mixed	-7.93955	18.4937	409.009	-0.429312	0.903436				CSR - CSm	07
CSS - CSm	07	Male	Mixed	46.1451	19.5195	396.254	2.36405	0.0485784				CSS - CSm	07	Male	Mixed	87.4278	18.2818	408.011	4.78222	7.23591e-06				CSS - CSm	07	Male	Mixed	4.0187	23.18	353.397	0.173369	0.983567				CSS - CSm	07	Male	Mixed	85.9	18.4937	409.009	4.64483	1.36896e-05				CSS - CSm	07
CSR - CSS	10	Male	Mixed	-44.5639	23.1548	396.011	-1.92461	0.133091				CSR - CSS	10	Male	Mixed	-67.2141	22.3906	408.011	-3.00189	0.00799929				CSR - CSS	10	Male	Mixed	-0.0432802	27.8463	353.787	-0.00155425	0.999999				CSR - CSS	10	Male	Mixed	-71.9119	22.65	409.009	-3.17491	0.00458552				CSR - CSS	10
CSR - CSm	10	Male	Mixed	0.825	23.1548	396.011	0.0356298	0.9993				CSR - CSm	10	Male	Mixed	-1.43909	22.3906	408.011	-0.064272	0.997725				CSR - CSm	10	Male	Mixed	5.10556	27.6034	352.014	0.184961	0.981318				CSR - CSm	10	Male	Mixed	-0.248016	22.65	409.009	-0.0109499	0.999934				CSR - CSm	10
CSS - CSm	10	Male	Mixed	45.3889	23.1548	396.011	1.96024	0.123546				CSS - CSm	10	Male	Mixed	65.775	22.3906	408.011	2.93762	0.00976499				CSS - CSm	10	Male	Mixed	5.14884	27.8463	353.787	0.184902	0.98133				CSS - CSm	10	Male	Mixed	71.6639	22.65	409.009	3.16396	0.00475378				CSS - CSm	10
CSR - CSS	13	Male	Mixed	-82.2003	18.9058	396.011	-4.34789	5.19336e-05				CSR - CSS	13	Male	Mixed	-124.179	18.2818	408.011	-6.79246	9.38392e-11				CSR - CSS	13	Male	Mixed	-38.4536	22.108	353.009	-1.73935	0.192049				CSR - CSS	13	Male	Mixed	-131.641	18.4937	409.009	-7.11818	0				CSR - CSS	13
CSR - CSm	13	Male	Mixed	1.7608	18.9058	396.011	0.0931355	0.995229				CSR - CSm	13	Male	Mixed	3.75278	18.2818	408.011	0.205273	0.97704				CSR - CSm	13	Male	Mixed	-24.68	25.8386	353.688	-0.955159	0.60573				CSR - CSm	13	Male	Mixed	4.99198	18.4937	409.009	0.269929	0.960635				CSR - CSm	13
CSS - CSm	13	Male	Mixed	83.9611	18.9058	396.011	4.44102	3.45596e-05				CSS - CSm	13	Male	Mixed	127.931	18.2818	408.011	6.99773	8.69171e-12				CSS - CSm	13	Male	Mixed	13.7736	24.5995	353.825	0.559915	0.841436				CSS - CSm	13	Male	Mixed	136.633	18.4937	409.009	7.38811	0				CSS - CSm	13
CSR - CSS	15	Male	Mixed	-89.9392	19.5277	396.391	-4.60573	1.65164e-05				CSR - CSS	15	Male	Mixed	-123.488	18.8806	408.354	-6.54048	5.2732e-10				CSR - CSS	15	Male	Mixed	-52.6188	26.5885	354.26	-1.979	0.118893				CSR - CSS	15	Male	Mixed	-130.78	18.4937	409.009	-7.07159	0				CSR - CSS	15
CSR - CSm	15	Male	Mixed	-25.6976	21.7512	396.685	-1.18143	0.464951				CSR - CSm	15	Male	Mixed	-1.30683	18.8806	408.354	-0.0692154	0.997362				CSR - CSm	15	Male	Mixed	-38.9205	38.1913	353.497	-1.01909	0.565289				CSR - CSm	15	Male	Mixed	-2.64074	18.4937	409.009	-0.142792	0.988822				CSR - CSm	15
CSS - CSm	15	Male	Mixed	64.2416	21.2684	397.037	3.02052	0.00755634				CSS - CSm	15	Male	Mixed	122.181	18.2818	408.011	6.68321	2.07264e-10				CSS - CSm	15	Male	Mixed	13.6983	34.7874	354.735	0.393773	0.918109				CSS - CSm	15	Male	Mixed	128.139	18.4937	409.009	6.92879	2.57547e-11				CSS - CSm	15
CSS - CSm	01	Female	Aversive	17.8714	21.4372	396.011	0.833666	0.404972				CSS - CSm	01	Female	Aversive	14.2	20.7297	408.011	0.685009	0.493727				CSS - CSm	01	Female	Aversive	15.0905	23.3291	352.014	0.646851	0.51815				CSS - CSm	01	Female	Aversive	16.3429	20.9699	409.009	0.77935	0.436224				CSS - CSm	01
CSS - CSm	04	Female	Aversive	1.275	20.0526	396.011	0.0635827	0.949335				CSS - CSm	04	Female	Aversive	0.95	19.3908	408.011	0.0489922	0.960949				CSS - CSm	04	Female	Aversive	-9.72292	21.8224	352.014	-0.445548	0.656198				CSS - CSm	04	Female	Aversive	-8.35	19.6155	409.009	-0.425684	0.670562				CSS - CSm	04
CSS - CSm	07	Female	Aversive	39.2	20.0526	396.011	1.95486	0.0513033				CSS - CSm	07	Female	Aversive	39.05	19.3908	408.011	2.01384	0.0446824				CSS - CSm	07	Female	Aversive	13.7187	21.8224	352.014	0.628655	0.529983				CSS - CSm	07	Female	Aversive	29.625	19.6155	409.009	1.51028	0.131743				CSS - CSm	07
CSS - CSm	10	Female	Aversive	33.8187	20.0526	396.011	1.6865	0.0924873				CSS - CSm	10	Female	Aversive	48.35	19.3908	408.011	2.49345	0.0130462				CSS - CSm	10	Female	Aversive	-6.90417	21.8224	352.014	-0.31638	0.751902				CSS - CSm	10	Female	Aversive	45	19.6155	409.009	2.2941	0.0222907				CSS - CSm	10
CSS - CSm	13	Female	Aversive	25.675	20.0526	396.011	1.28038	0.201161				CSS - CSm	13	Female	Aversive	28.675	19.3908	408.011	1.47879	0.139967				CSS - CSm	13	Female	Aversive	-5.55208	21.8224	352.014	-0.254421	0.799319				CSS - CSm	13	Female	Aversive	28.05	19.6155	409.009	1.42999	0.153483				CSS - CSm	13
CSS - CSm	15	Female	Aversive	88.15	20.0526	396.011	4.39593	1.41871e-05				CSS - CSm	15	Female	Aversive	70.75	19.3908	408.011	3.64863	0.000297837				CSS - CSm	15	Female	Aversive	68.5042	21.8224	352.014	3.13917	0.00183748				CSS - CSm	15	Female	Aversive	56.5	19.6155	409.009	2.88037	0.00418094				CSS - CSm	15
CSS - CSm	01	Male	Aversive	14.9687	20.0526	396.011	0.746473	0.455825				CSS - CSm	01	Male	Aversive	-5.45	19.3908	408.011	-0.281061	0.778806				CSS - CSm	01	Male	Aversive	30.6646	21.8224	352.014	1.40519	0.160847				CSS - CSm	01	Male	Aversive	-0.35	19.6155	409.009	-0.017843	0.985773				CSS - CSm	01
CSS - CSm	04	Male	Aversive	34	20.0526	396.011	1.69554	0.0907595				CSS - CSm	04	Male	Aversive	33.9	19.3908	408.011	1.74825	0.0811729				CSS - CSm	04	Male	Aversive	27.4	21.8224	352.014	1.25559	0.210097				CSS - CSm	04	Male	Aversive	31.325	19.6155	409.009	1.59695	0.111049				CSS - CSm	04
CSS - CSm	07	Male	Aversive	89.7812	20.0526	396.011	4.47728	9.90019e-06				CSS - CSm	07	Male	Aversive	89.025	19.3908	408.011	4.59109	5.88074e-06				CSS - CSm	07	Male	Aversive	56.6479	21.8224	352.014	2.59586	0.00983055				CSS - CSm	07	Male	Aversive	82.875	19.6155	409.009	4.22497	2.94875e-05				CSS - CSm	07
CSS - CSm	10	Male	Aversive	112.406	20.0526	396.011	5.60556	3.89527e-08				CSS - CSm	10	Male	Aversive	109.75	19.3908	408.011	5.65989	2.85592e-08				CSS - CSm	10	Male	Aversive	70.1813	21.8224	352.014	3.21602	0.00142026				CSS - CSm	10	Male	Aversive	99.975	19.6155	409.009	5.09673	5.29138e-07				CSS - CSm	10
CSS - CSm	13	Male	Aversive	77.2562	20.0526	396.011	3.85267	0.000136247				CSS - CSm	13	Male	Aversive	78.55	19.3908	408.011	4.05089	6.10878e-05				CSS - CSm	13	Male	Aversive	41	21.8224	352.014	1.8788	0.0610975				CSS - CSm	13	Male	Aversive	67.8	19.6155	409.009	3.45645	0.000604677				CSS - CSm	13
CSS - CSm	15	Male	Aversive	186.604	20.0526	396.011	9.30572	0				CSS - CSm	15	Male	Aversive	170.925	19.3908	408.011	8.81474	0				CSS - CSm	15	Male	Aversive	153.865	21.8224	352.014	7.05076	6.91647e-12				CSS - CSm	15	Male	Aversive	155.006	19.6155	409.009	7.90223	0				CSS - CSm	15
LME Model:Freezing ~ Cue type * Sex * Protocol * Session + (1 | id)												LME Model:Freezing ~ Cue type * Sex * Protocol * Session + (1 | id)												LME Model:Freezing ~ Cue type * Sex * Protocol * Session + (1 | id)												LME Model:Freezing ~ Cue type * Sex * Protocol * Session + (1 | id)												LME Model:Freezing ~ Cue type * Sex * Protocol * Session + (1 | id)
term	estimate	std.error	statistic	conf.low	conf.high	group	level	section				term	estimate	std.error	statistic	conf.low	conf.high	group	level	section				term	estimate	std.error	statistic	conf.low	conf.high	group	level	section				term	estimate	std.error	statistic	conf.low	conf.high	group	level	section				term	estimate
(Intercept)	70.8038	18.644	3.79768	34.2624	107.345			Fixed Effects				(Intercept)	70.2751	17.1994	4.08589	36.5648	103.985			Fixed Effects				(Intercept)	84.526	20.4485	4.1336	44.4476	124.604			Fixed Effects				(Intercept)	77.1585	17.7378	4.34994	42.393	111.924			Fixed Effects				(Intercept)	78.7118
TypeCSS	22.404	21.4372	1.0451	-19.6121	64.42			Fixed Effects				TypeCSS	13.1519	20.1094	0.654019	-26.2618	52.5657			Fixed Effects				TypeCSS	30.8561	25.6878	1.2012	-19.4911	81.2032			Fixed Effects				TypeCSS	17.5241	20.3428	0.86144	-22.347	57.3952			Fixed Effects				TypeCSS	12.9112
TypeCSm	22.4254	21.4372	1.0461	-19.5907	64.4415			Fixed Effects				TypeCSm	22.2487	19.3908	1.14738	-15.7566	60.254			Fixed Effects				TypeCSm	14.996	23.3291	0.642803	-30.7282	60.7203			Fixed Effects				TypeCSm	25.8518	19.6155	1.31793	-12.5939	64.2975			Fixed Effects				TypeCSm	20.4136
SexMale	-19.4455	25.3101	-0.76829	-69.0525	30.1614			Fixed Effects				SexMale	-13.2611	23.864	-0.555697	-60.0336	33.5114			Fixed Effects				SexMale	-28.7884	28.2713	-1.01829	-84.1991	26.6223			Fixed Effects				SexMale	-11.7711	24.6288	-0.477941	-60.0428	36.5005			Fixed Effects				SexMale	-24.4997
ConditionAversive	80.7431	26.6164	3.03358	28.5758	132.91			Fixed Effects				ConditionAversive	104.31	25.157	4.14635	55.0029	153.617			Fixed Effects				ConditionAversive	56.7871	29.1758	1.94638	-0.39629	113.971			Fixed Effects				ConditionAversive	112.494	25.9416	4.33645	61.6498	163.339			Fixed Effects				ConditionAversive	95.2865
Session04	-12.9196	20.2983	-0.636486	-52.7035	26.8643			Fixed Effects				Session04	-10.1239	18.878	-0.536281	-47.1241	26.8763			Fixed Effects				Session04	-19.8129	22.6414	-0.87507	-64.1891	24.5634			Fixed Effects				Session04	-9.89317	19.0971	-0.518047	-47.3227	27.5364			Fixed Effects				Session04	-16.5679
Session07	-5.26734	20.2983	-0.259497	-45.0513	34.5166			Fixed Effects				Session07	0.87904	18.878	0.0465643	-36.1211	37.8792			Fixed Effects				Session07	-23.2105	22.6414	-1.02514	-67.5868	21.1658			Fixed Effects				Session07	4.84215	19.0971	0.253555	-32.5874	42.2717			Fixed Effects				Session07	-10.3653
Session10	-42.8316	20.7984	-2.05937	-83.5958	-2.0674			Fixed Effects				Session10	-33.3001	18.878	-1.76397	-70.3003	3.70003			Fixed Effects				Session10	-59.3543	24.4829	-2.42432	-107.34	-11.3687			Fixed Effects				Session10	-34.3415	19.0971	-1.79826	-71.7711	3.088			Fixed Effects				Session10	-46.6206
Session13	-31.5094	20.2983	-1.55232	-71.2933	8.27453			Fixed Effects				Session13	-24.7084	18.878	-1.30885	-61.7086	12.2917			Fixed Effects				Session13	-49.6093	22.1212	-2.24261	-92.9661	-6.25256			Fixed Effects				Session13	-24.7634	19.0971	-1.29671	-62.1929	12.6661			Fixed Effects				Session13	-37.6186
Session15	-53.0844	22.4657	-2.36291	-97.1163	-9.05251			Fixed Effects				Session15	-43.0251	18.878	-2.27911	-80.0253	-6.02492			Fixed Effects				Session15	-69.0132	27.5887	-2.5015	-123.086	-14.9403			Fixed Effects				Session15	-40.0955	19.0971	-2.09957	-77.525	-2.66597			Fixed Effects				Session15	-63.5371
TypeCSS:SexMale	-10.1179	28.5829	-0.353983	-66.1393	45.9036			Fixed Effects				TypeCSS:SexMale	-1.76036	27.1775	-0.0647728	-55.0272	51.5065			Fixed Effects				TypeCSS:SexMale	-19.3069	34.3323	-0.56235	-86.5968	47.9831			Fixed Effects				TypeCSS:SexMale	-4.58365	27.4926	-0.166723	-58.4682	49.3009			Fixed Effects				TypeCSS:SexMale	-4.2308
TypeCSm:SexMale	18.894	28.5829	0.661027	-37.1274	74.9155			Fixed Effects				TypeCSm:SexMale	13.4169	26.6501	0.503447	-38.8164	65.6503			Fixed Effects				TypeCSm:SexMale	33.2387	31.9447	1.04051	-29.3718	95.8492			Fixed Effects				TypeCSm:SexMale	8.96087	26.9589	0.33239	-43.8777	61.7994			Fixed Effects				TypeCSm:SexMale	18.5668
TypeCSS:ConditionAversive	17.8929	30.3167	0.590197	-41.5268	77.3126			Fixed Effects				TypeCSS:ConditionAversive	23.2968	28.8809	0.806649	-33.3088	79.9023			Fixed Effects				TypeCSS:ConditionAversive	-0.76958	34.7003	-0.02218	-68.7809	67.2417			Fixed Effects				TypeCSS:ConditionAversive	24.6706	29.2158	0.844425	-32.5914	81.9325			Fixed Effects				TypeCSS:ConditionAversive	20.1024
SexMale:ConditionAversive	-7.99585	36.4839	-0.219161	-79.5029	63.5112			Fixed Effects				SexMale:ConditionAversive	-5.81437	34.8485	-0.166847	-74.1162	62.4875			Fixed Effects				SexMale:ConditionAversive	-9.71566	40.3542	-0.24076	-88.8084	69.377			Fixed Effects				SexMale:ConditionAversive	-4.11934	35.9633	-0.114543	-74.606	66.3674			Fixed Effects				SexMale:ConditionAversive	-8.35406
TypeCSS:Session04	26.5229	28.5829	0.927929	-29.4986	82.5443			Fixed Effects				TypeCSS:Session04	46.8191	27.1775	1.72272	-6.44776	100.086			Fixed Effects				TypeCSS:Session04	-8.13401	33.3579	-0.24384	-73.5142	57.2462			Fixed Effects				TypeCSS:Session04	44.7106	27.4926	1.62628	-9.17394	98.5952			Fixed Effects				TypeCSS:Session04	32.0948
TypeCSm:Session04	-17.1041	29.0017	-0.589759	-73.9464	39.7383			Fixed Effects				TypeCSm:Session04	-17.2443	26.6501	-0.647064	-69.4777	34.989			Fixed Effects				TypeCSm:Session04	-4.6276	32.5097	-0.14235	-68.3454	59.0902			Fixed Effects				TypeCSm:Session04	-17.6819	26.9589	-0.655883	-70.5204	35.1566			Fixed Effects				TypeCSm:Session04	-13.1606
TypeCSS:Session07	30.1595	28.5829	1.05516	-25.8619	86.181			Fixed Effects				TypeCSS:Session07	62.4661	27.1775	2.29845	9.19928	115.733			Fixed Effects				TypeCSS:Session07	-14.1438	33.3579	-0.424	-79.524	51.2364			Fixed Effects				TypeCSS:Session07	55.7197	27.4926	2.02672	1.83519	109.604			Fixed Effects				TypeCSS:Session07	47.0367
TypeCSm:Session07	-16.823	28.5829	-0.588569	-72.8444	39.1984			Fixed Effects				TypeCSm:Session07	-9.4436	26.6501	-0.354354	-61.6769	42.7897			Fixed Effects				TypeCSm:Session07	9.63073	32.512	0.296221	-54.0916	73.353			Fixed Effects				TypeCSm:Session07	-21.058	26.9589	-0.781112	-73.8965	31.7806			Fixed Effects				TypeCSm:Session07	-8.32313
TypeCSS:Session10	43.196	29.0017	1.48943	-13.6464	100.038			Fixed Effects				TypeCSS:Session10	87.4731	27.1775	3.21859	34.2062	140.74			Fixed Effects				TypeCSS:Session10	6.58517	34.5285	0.190717	-61.0895	74.2598			Fixed Effects				TypeCSS:Session10	91.1868	27.4926	3.31677	37.3022	145.071			Fixed Effects				TypeCSS:Session10	58.6476
TypeCSm:Session10	2.39374	29.8684	0.080143	-56.1473	60.9348			Fixed Effects				TypeCSm:Session10	-6.19148	27.5794	-0.224496	-60.2462	47.8632			Fixed Effects				TypeCSm:Session10	21.8206	34.3395	0.635438	-45.4836	89.1249			Fixed Effects				TypeCSm:Session10	-11.2282	27.8994	-0.402451	-65.91	43.4537			Fixed Effects				TypeCSm:Session10	9.48984
TypeCSS:Session13	57.0423	28.5829	1.99568	1.02089	113.064			Fixed Effects				TypeCSS:Session13	89.7703	27.1775	3.30311	36.5034	143.037			Fixed Effects				TypeCSS:Session13	1.87725	32.9115	0.057039	-62.6281	66.3826			Fixed Effects				TypeCSS:Session13	91.2809	27.4926	3.32019	37.3963	145.165			Fixed Effects				TypeCSS:Session13	70.44
TypeCSm:Session13	-5.04947	28.5829	-0.176661	-61.0709	50.972			Fixed Effects				TypeCSm:Session13	-10.6395	26.6501	-0.399227	-62.8728	41.5939			Fixed Effects				TypeCSm:Session13	28.1804	33.9015	0.831244	-38.2653	94.6261			Fixed Effects				TypeCSm:Session13	-14.4024	26.9589	-0.534235	-67.2409	38.4361			Fixed Effects				TypeCSm:Session13	-3.37538
TypeCSS:Session15	84.4155	30.198	2.7954	25.2285	143.603			Fixed Effects				TypeCSS:Session15	107.598	27.1775	3.95909	54.3312	160.865			Fixed Effects				TypeCSS:Session15	36.3552	37.1279	0.979189	-36.4141	109.124			Fixed Effects				TypeCSS:Session15	104.969	27.4926	3.81806	51.084	158.853			Fixed Effects				TypeCSS:Session15	107.592
TypeCSm:Session15	-21.0225	30.5455	-0.688236	-80.8907	38.8456			Fixed Effects				TypeCSm:Session15	-22.4376	26.6501	-0.841932	-74.6709	29.7957			Fixed Effects				TypeCSm:Session15	-7.98614	36.8947	-0.21646	-80.2984	64.3261			Fixed Effects				TypeCSm:Session15	-26.0277	26.9589	-0.965458	-78.8663	26.8108			Fixed Effects				TypeCSm:Session15	-12.5235
SexMale:Session04	5.09022	27.739	0.183504	-49.2772	59.4576			Fixed Effects				SexMale:Session04	3.24389	26.2794	0.123439	-48.2627	54.7505			Fixed Effects				SexMale:Session04	8.54752	31.0638	0.27516	-52.3364	69.4315			Fixed Effects				SexMale:Session04	-2.12932	26.5841	-0.0800974	-54.2332	49.9745			Fixed Effects				SexMale:Session04	10.464
SexMale:Session07	13.8354	27.739	0.49877	-40.532	68.2028			Fixed Effects				SexMale:Session07	1.00897	26.2794	0.0383939	-50.4976	52.5156			Fixed Effects				SexMale:Session07	18.0887	31.0638	0.582306	-42.7953	78.9726			Fixed Effects				SexMale:Session07	-5.70793	26.5841	-0.214712	-57.8118	46.3959			Fixed Effects				SexMale:Session07	24.6725
SexMale:Session10	23.6093	29.7503	0.793583	-34.7002	81.9189			Fixed Effects				SexMale:Session10	22.6658	27.9157	0.811938	-32.0479	77.3795			Fixed Effects				SexMale:Session10	34.0691	35.0591	0.971762	-34.6455	102.784			Fixed Effects				SexMale:Session10	22.078	28.2387	0.781835	-33.2689	77.425			Fixed Effects				SexMale:Session10	30.7734
SexMale:Session13	5.61558	27.739	0.202444	-48.7518	59.983			Fixed Effects				SexMale:Session13	0.167609	26.2794	0.00637797	-51.339	51.6742			Fixed Effects				SexMale:Session13	15.07	31.6523	0.476109	-46.9675	77.1074			Fixed Effects				SexMale:Session13	-2.20603	26.5841	-0.0829833	-54.3099	49.8978			Fixed Effects				SexMale:Session13	8.22585
SexMale:Session15	19.4257	29.7659	0.652616	-38.9144	77.7659			Fixed Effects				SexMale:Session15	15.1228	26.699	0.566419	-37.2062	67.4518			Fixed Effects				SexMale:Session15	28.9346	38.6263	0.749089	-46.7717	104.641			Fixed Effects				SexMale:Session15	7.21187	26.5841	0.271285	-44.892	59.3157			Fixed Effects				SexMale:Session15	32.1516
ConditionAversive:Session04	87.8263	29.426	2.98465	30.1525	145.5			Fixed Effects				ConditionAversive:Session04	78.4597	27.5964	2.84311	24.3717	132.548			Fixed Effects				ConditionAversive:Session04	84.6376	32.5183	2.60277	20.903	148.372			Fixed Effects				ConditionAversive:Session04	79.4455	27.917	2.84578	24.7292	134.162			Fixed Effects				ConditionAversive:Session04	82.0916
ConditionAversive:Session07	61.543	29.0746	2.11673	4.55779	118.528			Fixed Effects				ConditionAversive:Session07	44.156	27.5964	1.60006	-9.93196	98.244			Fixed Effects				ConditionAversive:Session07	49.1956	32.6084	1.50868	-14.7156	113.107			Fixed Effects				ConditionAversive:Session07	52.2362	27.917	1.87113	-2.48002	106.952			Fixed Effects				ConditionAversive:Session07	54.2015
ConditionAversive:Session10	41.2718	29.9489	1.37807	-17.427	99.9705			Fixed Effects				ConditionAversive:Session10	27.4081	28.5082	0.96141	-28.467	83.2831			Fixed Effects				ConditionAversive:Session10	44.2287	33.3557	1.32597	-21.1473	109.605			Fixed Effects				ConditionAversive:Session10	28.9651	28.8398	1.00434	-27.56	85.4902			Fixed Effects				ConditionAversive:Session10	29.3814
ConditionAversive:Session13	20.4366	29.0746	0.7029	-36.5487	77.4218			Fixed Effects				ConditionAversive:Session13	14.9393	27.5964	0.541351	-39.1486	69.0273			Fixed Effects				ConditionAversive:Session13	14.5823	34.3693	0.424282	-52.7802	81.9448			Fixed Effects				ConditionAversive:Session13	15.3612	27.917	0.550247	-39.355	70.0775			Fixed Effects				ConditionAversive:Session13	17.7071
ConditionAversive:Session15	45.5346	29.4961	1.54375	-12.2767	103.346			Fixed Effects				ConditionAversive:Session15	45.0042	27.5964	1.6308	-9.08381	99.0921			Fixed Effects				ConditionAversive:Session15	41.3235	33.4873	1.23401	-24.3104	106.957			Fixed Effects				ConditionAversive:Session15	49.8186	27.917	1.78453	-4.89762	104.535			Fixed Effects				ConditionAversive:Session15	44.7487
TypeCSS:SexMale:ConditionAversive	26.1092	40.9712	0.637258	-54.1929	106.411			Fixed Effects				TypeCSS:SexMale:ConditionAversive	-4.4727	39.2981	-0.113815	-81.4955	72.5501			Fixed Effects				TypeCSS:SexMale:ConditionAversive	68.1196	46.8953	1.45259	-23.7934	160.033			Fixed Effects				TypeCSS:SexMale:ConditionAversive	-3.14834	39.7536	-0.0791964	-81.0639	74.7673			Fixed Effects				TypeCSS:SexMale:ConditionAversive	16.3289
TypeCSS:SexMale:Session04	10.9843	39.1387	0.280649	-65.7262	87.6948			Fixed Effects				TypeCSS:SexMale:Session04	5.46464	37.5109	0.145681	-68.0553	78.9846			Fixed Effects				TypeCSS:SexMale:Session04	19.502	45.5896	0.427772	-69.8521	108.856			Fixed Effects				TypeCSS:SexMale:Session04	14.71	37.9457	0.387659	-59.6622	89.0822			Fixed Effects				TypeCSS:SexMale:Session04	13.5942
TypeCSm:SexMale:Session04	24.2186	39.4457	0.613974	-53.0935	101.531			Fixed Effects				TypeCSm:SexMale:Session04	14.4355	37.1306	0.388776	-58.3392	87.2101			Fixed Effects				TypeCSm:SexMale:Session04	9.65869	44.9596	0.21483	-78.4605	97.7779			Fixed Effects				TypeCSm:SexMale:Session04	8.37105	37.5608	0.222867	-65.2468	81.9889			Fixed Effects				TypeCSm:SexMale:Session04	15.1274
TypeCSS:SexMale:Session07	9.65578	39.1387	0.246706	-67.0547	86.3663			Fixed Effects				TypeCSS:SexMale:Session07	18.0329	37.5109	0.480738	-55.4871	91.5529			Fixed Effects				TypeCSS:SexMale:Session07	28.7103	45.3309	0.633349	-60.1367	117.557			Fixed Effects				TypeCSS:SexMale:Session07	25.1794	37.9457	0.663563	-49.1929	99.5516			Fixed Effects				TypeCSS:SexMale:Session07	-7.59755
TypeCSm:SexMale:Session07	-18.5401	39.4386	-0.470101	-95.8384	58.7581			Fixed Effects				TypeCSm:SexMale:Session07	-21.7592	37.1306	-0.586019	-94.5339	51.0154			Fixed Effects				TypeCSm:SexMale:Session07	-35.7684	45.5017	-0.78609	-124.95	53.4134			Fixed Effects				TypeCSm:SexMale:Session07	-5.81515	37.5608	-0.154819	-79.433	67.8027			Fixed Effects				TypeCSm:SexMale:Session07	-22.2774
TypeCSS:SexMale:Session10	-10.9182	41.6494	-0.262145	-92.5496	70.7132			Fixed Effects				TypeCSS:SexMale:Session10	-31.6506	39.6759	-0.797728	-109.414	46.1128			Fixed Effects				TypeCSS:SexMale:Session10	-18.0911	49.7602	-0.36357	-115.619	79.4372			Fixed Effects				TypeCSS:SexMale:Session10	-32.2153	40.1358	-0.802657	-110.88	46.4495			Fixed Effects				TypeCSS:SexMale:Session10	-17.2428
TypeCSm:SexMale:Session10	-44.5382	42.2575	-1.05397	-127.361	38.285			Fixed Effects				TypeCSm:SexMale:Session10	-28.0351	39.9524	-0.701713	-106.34	50.2701			Fixed Effects				TypeCSm:SexMale:Session10	-75.1609	49.1668	-1.52869	-171.526	21.2041			Fixed Effects				TypeCSm:SexMale:Session10	-23.3365	40.4156	-0.577413	-102.55	55.8766			Fixed Effects				TypeCSm:SexMale:Session10	-46.7267
TypeCSS:SexMale:Session13	12.8719	39.1387	0.328878	-63.8386	89.5824			Fixed Effects				TypeCSS:SexMale:Session13	23.0168	37.5109	0.613604	-50.5031	96.5368			Fixed Effects				TypeCSS:SexMale:Session13	25.0272	45.6909	0.547749	-64.5254	114.58			Fixed Effects				TypeCSS:SexMale:Session13	27.4201	37.9457	0.722613	-46.9522	101.792			Fixed Effects				TypeCSS:SexMale:Session13	13.3324
TypeCSm:SexMale:Session13	-38.0308	39.1387	-0.971692	-114.741	38.6797			Fixed Effects				TypeCSm:SexMale:Session13	-28.779	37.1306	-0.775074	-101.554	43.9957			Fixed Effects				TypeCSm:SexMale:Session13	-51.7351	47.8845	-1.08041	-145.587	42.1168			Fixed Effects				TypeCSm:SexMale:Session13	-25.4022	37.5608	-0.676296	-99.0201	48.2157			Fixed Effects				TypeCSm:SexMale:Session13	-31.3782
TypeCSS:SexMale:Session15	-6.76236	40.6282	-0.166445	-86.3923	72.8675			Fixed Effects				TypeCSS:SexMale:Session15	4.49867	37.806	0.118993	-69.5998	78.5972			Fixed Effects				TypeCSS:SexMale:Session15	4.71441	50.9713	0.092491	-95.1875	104.616			Fixed Effects				TypeCSS:SexMale:Session15	12.8707	37.9457	0.339187	-61.5015	87.2429			Fixed Effects				TypeCSS:SexMale:Session15	-20.56
TypeCSm:SexMale:Session15	5.40068	41.9942	0.128605	-76.9065	87.7079			Fixed Effects				TypeCSm:SexMale:Session15	-11.9212	37.4288	-0.318504	-85.2802	61.4378			Fixed Effects				TypeCSm:SexMale:Session15	-1.3281	57.4069	-0.02313	-113.844	111.187			Fixed Effects				TypeCSm:SexMale:Session15	-6.1442	37.5608	-0.16358	-79.7621	67.4737			Fixed Effects				TypeCSm:SexMale:Session15	-0.535886
TypeCSS:ConditionAversive:Session04	-60.2234	41.2645	-1.45945	-141.1	20.6536			Fixed Effects				TypeCSS:ConditionAversive:Session04	-77.3134	39.2981	-1.96736	-154.336	-0.290653			Fixed Effects				TypeCSS:ConditionAversive:Session04	-21.307	46.5809	-0.45742	-112.604	69.99			Fixed Effects				TypeCSS:ConditionAversive:Session04	-87.0854	39.7536	-2.19063	-165.001	-9.16978			Fixed Effects				TypeCSS:ConditionAversive:Session04	-60.0304
TypeCSS:ConditionAversive:Session07	-25.654	40.9712	-0.626146	-105.956	54.6482			Fixed Effects				TypeCSS:ConditionAversive:Session07	-47.0597	39.2981	-1.19751	-124.083	29.9631			Fixed Effects				TypeCSS:ConditionAversive:Session07	22.4028	46.5539	0.481223	-68.8411	113.647			Fixed Effects				TypeCSS:ConditionAversive:Session07	-63.4956	39.7536	-1.59723	-141.411	14.42			Fixed Effects				TypeCSS:ConditionAversive:Session07	-34.9348
TypeCSS:ConditionAversive:Session10	-24.8549	41.6316	-0.59702	-106.451	56.7416			Fixed Effects				TypeCSS:ConditionAversive:Session10	-59.5146	39.9669	-1.4891	-137.848	18.8191			Fixed Effects				TypeCSS:ConditionAversive:Session10	-6.75918	47.0392	-0.14369	-98.9542	85.4359			Fixed Effects				TypeCSS:ConditionAversive:Session10	-73.7578	40.4308	-1.8243	-153.001	5.4851			Fixed Effects				TypeCSS:ConditionAversive:Session10	-29.4702
TypeCSS:ConditionAversive:Session13	-54.2882	40.9712	-1.32503	-134.59	26.0139			Fixed Effects				TypeCSS:ConditionAversive:Session13	-85.9347	39.2981	-2.18674	-162.958	-8.91195			Fixed Effects				TypeCSS:ConditionAversive:Session13	5.6606	47.8095	0.118399	-88.0442	99.3654			Fixed Effects				TypeCSS:ConditionAversive:Session13	-93.9761	39.7536	-2.36397	-171.892	-16.0605			Fixed Effects				TypeCSS:ConditionAversive:Session13	-61.0153
TypeCSS:ConditionAversive:Session15	-35.1594	41.2595	-0.852154	-116.027	45.7076			Fixed Effects				TypeCSS:ConditionAversive:Session15	-73.4857	39.2981	-1.86996	-150.508	3.53713			Fixed Effects				TypeCSS:ConditionAversive:Session15	9.07237	47.0878	0.192669	-83.218	101.363			Fixed Effects				TypeCSS:ConditionAversive:Session15	-90.8391	39.7536	-2.28505	-168.755	-12.9235			Fixed Effects				TypeCSS:ConditionAversive:Session15	-54.1403
SexMale:ConditionAversive:Session04	-41.8115	40.3166	-1.03708	-120.831	37.2075			Fixed Effects				SexMale:ConditionAversive:Session04	-31.3458	38.3639	-0.817065	-106.538	43.8461			Fixed Effects				SexMale:ConditionAversive:Session04	-41.8846	45.3051	-0.9245	-130.681	46.9118			Fixed Effects				SexMale:ConditionAversive:Session04	-22.2121	38.809	-0.572345	-98.2765	53.8522			Fixed Effects				SexMale:ConditionAversive:Session04	-34.8296
SexMale:ConditionAversive:Session07	-41.5542	40.3539	-1.02974	-120.646	37.538			Fixed Effects				SexMale:ConditionAversive:Session07	-25.6412	38.3639	-0.668367	-100.833	49.5507			Fixed Effects				SexMale:ConditionAversive:Session07	-20.9528	45.8324	-0.45716	-110.783	68.8771			Fixed Effects				SexMale:ConditionAversive:Session07	-34.4723	38.809	-0.888255	-110.537	41.592			Fixed Effects				SexMale:ConditionAversive:Session07	-45.4831
SexMale:ConditionAversive:Session10	-6.38635	41.8515	-0.152595	-88.4138	75.6411			Fixed Effects				SexMale:ConditionAversive:Session10	-13.4222	40.1451	-0.334341	-92.1051	65.2608			Fixed Effects				SexMale:ConditionAversive:Session10	12.1967	47.1015	0.258946	-80.1204	104.514			Fixed Effects				SexMale:ConditionAversive:Session10	-13.612	40.6108	-0.335181	-93.2076	65.9837			Fixed Effects				SexMale:ConditionAversive:Session10	-5.15976
SexMale:ConditionAversive:Session13	26.4313	40.0609	0.659778	-52.0866	104.949			Fixed Effects				SexMale:ConditionAversive:Session13	24.2949	38.3639	0.633275	-50.897	99.4869			Fixed Effects				SexMale:ConditionAversive:Session13	9.50557	47.8123	0.19881	-84.2048	103.216			Fixed Effects				SexMale:ConditionAversive:Session13	30.7379	38.809	0.792028	-45.3265	106.802			Fixed Effects				SexMale:ConditionAversive:Session13	26.4705
SexMale:ConditionAversive:Session15	-83.5083	41.5258	-2.011	-164.897	-2.11921			Fixed Effects				SexMale:ConditionAversive:Session15	-66.243	38.3639	-1.7267	-141.435	8.94889			Fixed Effects				SexMale:ConditionAversive:Session15	-79.9015	53.2123	-1.50156	-184.196	24.3926			Fixed Effects				SexMale:ConditionAversive:Session15	-62.0693	38.809	-1.59935	-138.134	13.995			Fixed Effects				SexMale:ConditionAversive:Session15	-84.0163
TypeCSS:SexMale:ConditionAversive:Session04	48.862	56.7612	0.860835	-62.3879	160.112			Fixed Effects				TypeCSS:SexMale:ConditionAversive:Session04	61.5708	54.45	1.13078	-45.1491	168.291			Fixed Effects				TypeCSS:SexMale:ConditionAversive:Session04	11.7056	64.4441	0.181639	-114.602	138.014			Fixed Effects				TypeCSS:SexMale:ConditionAversive:Session04	50.0289	55.081	0.908279	-57.9279	157.986			Fixed Effects				TypeCSS:SexMale:ConditionAversive:Session04	46.377
TypeCSS:SexMale:ConditionAversive:Session07	25.288	56.7563	0.445554	-85.9523	136.528			Fixed Effects				TypeCSS:SexMale:ConditionAversive:Session07	29.8329	54.45	0.547895	-76.8871	136.553			Fixed Effects				TypeCSS:SexMale:ConditionAversive:Session07	-37.1237	64.5883	-0.57477	-163.714	89.4672			Fixed Effects				TypeCSS:SexMale:ConditionAversive:Session07	38.9483	55.081	0.70711	-69.0084	146.905			Fixed Effects				TypeCSS:SexMale:ConditionAversive:Session07	43.4639
TypeCSS:SexMale:ConditionAversive:Session10	47.8702	58.5746	0.817252	-66.9339	162.674			Fixed Effects				TypeCSS:SexMale:ConditionAversive:Session10	84.6655	56.4352	1.50023	-25.9454	195.276			Fixed Effects				TypeCSS:SexMale:ConditionAversive:Session10	4.44151	66.7007	0.066589	-126.289	135.172			Fixed Effects				TypeCSS:SexMale:ConditionAversive:Session10	80.5467	57.0896	1.41088	-31.3469	192.44			Fixed Effects				TypeCSS:SexMale:ConditionAversive:Session10	53.5348
TypeCSS:SexMale:ConditionAversive:Session13	3.58128	56.5484	0.0633313	-107.251	114.414			Fixed Effects				TypeCSS:SexMale:ConditionAversive:Session13	17.7292	54.45	0.325605	-88.9908	124.449			Fixed Effects				TypeCSS:SexMale:ConditionAversive:Session13	-45.7843	65.9474	-0.69425	-175.039	83.4703			Fixed Effects				TypeCSS:SexMale:ConditionAversive:Session13	3.62057	55.081	0.0657317	-104.336	111.577			Fixed Effects				TypeCSS:SexMale:ConditionAversive:Session13	5.20192
TypeCSS:SexMale:ConditionAversive:Session15	113.52	57.5869	1.97128	0.651628	226.388			Fixed Effects				TypeCSS:SexMale:ConditionAversive:Session15	103.405	54.45	1.89909	-3.31484	210.125			Fixed Effects				TypeCSS:SexMale:ConditionAversive:Session15	63.7438	70.0047	0.910565	-73.4629	200.951			Fixed Effects				TypeCSS:SexMale:ConditionAversive:Session15	96.1842	55.081	1.74623	-11.7726	204.141			Fixed Effects				TypeCSS:SexMale:ConditionAversive:Session15	124.63
(Intercept)	-50.3591	10.8896				ID	301	Random Effects				(Intercept)	-44.954	10.5284				ID	301	Random Effects				(Intercept)	-65.8794	11.8755				ID	301	Random Effects				(Intercept)	-46.1063	10.7115				ID	301	Random Effects				(Intercept)	-47.5624
(Intercept)	60.0707	10.8896				ID	302	Random Effects				(Intercept)	52.103	10.5284				ID	302	Random Effects				(Intercept)	82.3474	11.8755				ID	302	Random Effects				(Intercept)	49.5253	10.7115				ID	302	Random Effects				(Intercept)	56.5821
(Intercept)	12.6794	10.8896				ID	303	Random Effects				(Intercept)	19.5566	10.5284				ID	303	Random Effects				(Intercept)	-1.9348	11.8755				ID	303	Random Effects				(Intercept)	25.938	10.7115				ID	303	Random Effects				(Intercept)	19.2941
(Intercept)	-24.4307	10.8896				ID	304	Random Effects				(Intercept)	-24.1776	10.5284				ID	304	Random Effects				(Intercept)	-23.4928	11.8755				ID	304	Random Effects				(Intercept)	-22.4742	10.7115				ID	304	Random Effects				(Intercept)	-25.3016
(Intercept)	0.201211	10.8896				ID	305	Random Effects				(Intercept)	-9.29739	10.5284				ID	305	Random Effects				(Intercept)	11.3447	11.8755				ID	305	Random Effects				(Intercept)	-18.2137	10.7115				ID	305	Random Effects				(Intercept)	-7.94114
(Intercept)	3.23873	10.8896				ID	306	Random Effects				(Intercept)	9.41531	10.5284				ID	306	Random Effects				(Intercept)	3.29829	11.8755				ID	306	Random Effects				(Intercept)	14.2039	10.7115				ID	306	Random Effects				(Intercept)	11.1814
(Intercept)	-24.0658	10.8896				ID	307	Random Effects				(Intercept)	-22.9247	10.5284				ID	307	Random Effects				(Intercept)	-25.1339	11.8755				ID	307	Random Effects				(Intercept)	-28.1101	10.7115				ID	307	Random Effects				(Intercept)	-28.3954
(Intercept)	22.6656	10.8896				ID	308	Random Effects				(Intercept)	20.2788	10.5284				ID	308	Random Effects				(Intercept)	19.4504	11.8755				ID	308	Random Effects				(Intercept)	25.2372	10.7115				ID	308	Random Effects				(Intercept)	22.143
(Intercept)	-77.018	10.8896				ID	401	Random Effects				(Intercept)	-72.407	10.5284				ID	401	Random Effects				(Intercept)	-68.0992	11.8755				ID	401	Random Effects				(Intercept)	-74.8456	10.7115				ID	401	Random Effects				(Intercept)	-79.8221
(Intercept)	52.2685	10.8896				ID	402	Random Effects				(Intercept)	48.448	10.5284				ID	402	Random Effects				(Intercept)	59.5236	11.8755				ID	402	Random Effects				(Intercept)	45.9538	10.7115				ID	402	Random Effects				(Intercept)	50.5895
(Intercept)	-8.40829	10.8896				ID	403	Random Effects				(Intercept)	-5.92867	10.5284				ID	403	Random Effects				(Intercept)	-23.1928	11.8755				ID	403	Random Effects				(Intercept)	-5.03781	10.7115				ID	403	Random Effects				(Intercept)	-5.1719
(Intercept)	-14.4022	10.8896				ID	404	Random Effects				(Intercept)	-18.1778	10.5284				ID	404	Random Effects				(Intercept)	-6.8198	11.8755				ID	404	Random Effects				(Intercept)	-14.0284	10.7115				ID	404	Random Effects				(Intercept)	-11.5226
(Intercept)	-31.5215	10.8896				ID	405	Random Effects				(Intercept)	-27.4494	10.5284				ID	405	Random Effects				(Intercept)	-31.486	11.8755				ID	405	Random Effects				(Intercept)	-28.9233	10.7115				ID	405	Random Effects				(Intercept)	-36.1834
(Intercept)	51.6639	10.8896				ID	406	Random Effects				(Intercept)	52.2952	10.5284				ID	406	Random Effects				(Intercept)	54.0968	11.8755				ID	406	Random Effects				(Intercept)	56.5547	10.7115				ID	406	Random Effects				(Intercept)	58.6762
(Intercept)	-2.39381	11.7938				ID	407	Random Effects				(Intercept)	-6.96514	11.4023				ID	407	Random Effects				(Intercept)	-13.136	12.8662				ID	407	Random Effects				(Intercept)	-12.2679	11.6121				ID	407	Random Effects				(Intercept)	-7.31671
(Intercept)	29.8114	10.8896				ID	408	Random Effects				(Intercept)	30.1849	10.5284				ID	408	Random Effects				(Intercept)	29.1134	11.8755				ID	408	Random Effects				(Intercept)	32.5946	10.7115				ID	408	Random Effects				(Intercept)	30.751
(Intercept)	18.334	9.06726				ID	551	Random Effects				(Intercept)	22.4513	8.76697				ID	551	Random Effects				(Intercept)	14.5353	10.7423				ID	551	Random Effects				(Intercept)	25.4555	8.90374				ID	551	Random Effects				(Intercept)	19.8861
(Intercept)	10.3793	9.06726				ID	552	Random Effects				(Intercept)	18.4592	8.76697				ID	552	Random Effects				(Intercept)	14.6894	9.88183				ID	552	Random Effects				(Intercept)	22.6349	8.90374				ID	552	Random Effects				(Intercept)	9.92777
(Intercept)	1.61005	9.30828				ID	553	Random Effects				(Intercept)	0.418081	8.76697				ID	553	Random Effects				(Intercept)	7.22096	10.7423				ID	553	Random Effects				(Intercept)	0.670082	8.90374				ID	553	Random Effects				(Intercept)	0.630801
(Intercept)	8.2099	9.85424				ID	554	Random Effects				(Intercept)	-0.359481	9.52768				ID	554	Random Effects				(Intercept)	28.2659	11.4589				ID	554	Random Effects				(Intercept)	0.282057	9.68328				ID	554	Random Effects				(Intercept)	7.33583
(Intercept)	5.3293	9.06726				ID	555	Random Effects				(Intercept)	9.18867	8.76697				ID	555	Random Effects				(Intercept)	-6.09884	10.7423				ID	555	Random Effects				(Intercept)	7.79666	8.90374				ID	555	Random Effects				(Intercept)	4.66595
(Intercept)	3.50449	9.06726				ID	561	Random Effects				(Intercept)	-0.318188	8.76697				ID	561	Random Effects				(Intercept)	-1.83279	9.88183				ID	561	Random Effects				(Intercept)	-1.39515	8.90374				ID	561	Random Effects				(Intercept)	2.99914
(Intercept)	-15.7552	11.3147				ID	562	Random Effects				(Intercept)	-26.0012	9.25254				ID	562	Random Effects				(Intercept)	-9.1951	14.9639				ID	562	Random Effects				(Intercept)	-28.9542	9.40114				ID	562	Random Effects				(Intercept)	-16.8245
(Intercept)	-13.8235	9.06726				ID	563	Random Effects				(Intercept)	-9.3982	8.76697				ID	563	Random Effects				(Intercept)	-21.309	10.1453				ID	563	Random Effects				(Intercept)	-8.5113	8.90374				ID	563	Random Effects				(Intercept)	-13.1581
(Intercept)	-17.7883	9.85424				ID	564	Random Effects				(Intercept)	-14.4402	8.99995				ID	564	Random Effects				(Intercept)	-26.2758	11.8755				ID	564	Random Effects				(Intercept)	-17.9785	9.14231				ID	564	Random Effects				(Intercept)	-15.4631
(Intercept)	-13.1361	10.5091				ID	651	Random Effects				(Intercept)	-15.2065	9.82891				ID	651	Random Effects				(Intercept)	-13.0849	12.3412				ID	651	Random Effects				(Intercept)	-12.2747	9.68328				ID	651	Random Effects				(Intercept)	-9.92011
(Intercept)	-2.36485	9.30828				ID	652	Random Effects				(Intercept)	-4.80363	8.76697				ID	652	Random Effects				(Intercept)	-3.90718	10.7423				ID	652	Random Effects				(Intercept)	-4.10037	8.90374				ID	652	Random Effects				(Intercept)	-5.79457
(Intercept)	57.0097	9.06726				ID	653	Random Effects				(Intercept)	59.3275	8.76697				ID	653	Random Effects				(Intercept)	54.4059	10.1453				ID	653	Random Effects				(Intercept)	67.3287	8.90374				ID	653	Random Effects				(Intercept)	62.2473
(Intercept)	-17.965	9.85424				ID	654	Random Effects				(Intercept)	-9.20449	9.52768				ID	654	Random Effects				(Intercept)	-19.4694	11.4589				ID	654	Random Effects				(Intercept)	-10.5395	9.68328				ID	654	Random Effects				(Intercept)	-18.0409
(Intercept)	-10.1224	9.06726				ID	655	Random Effects				(Intercept)	-6.06048	8.76697				ID	655	Random Effects				(Intercept)	-16.0941	11.4589				ID	655	Random Effects				(Intercept)	-5.21441	8.90374				ID	655	Random Effects				(Intercept)	-10.5554
(Intercept)	23.0915	9.06726				ID	661	Random Effects				(Intercept)	16.642	8.76697				ID	661	Random Effects				(Intercept)	24.1018	9.88183				ID	661	Random Effects				(Intercept)	19.4099	8.90374				ID	661	Random Effects				(Intercept)	20.9954
(Intercept)	-5.94888	10.1659				ID	662	Random Effects				(Intercept)	-9.42671	9.52768				ID	662	Random Effects				(Intercept)	-3.23963	11.8755				ID	662	Random Effects				(Intercept)	-10.9714	9.68328				ID	662	Random Effects				(Intercept)	-6.38828
(Intercept)	-16.8253	9.06726				ID	663	Random Effects				(Intercept)	-12.1695	8.76697				ID	663	Random Effects				(Intercept)	-17.6383	13.4646				ID	663	Random Effects				(Intercept)	-17.2702	8.90374				ID	663	Random Effects				(Intercept)	-19.8705
(Intercept)	-13.7386	9.30828				ID	664	Random Effects				(Intercept)	-19.0982	8.76697				ID	664	Random Effects				(Intercept)	-5.07417	11.0833				ID	664	Random Effects				(Intercept)	-26.3681	8.90374				ID	664	Random Effects				(Intercept)	-12.673
nobs	486							Model Summary				nobs	498							Model Summary				nobs	442							Model Summary				nobs	499							Model Summary				nobs	489
sigma	40.1053							Model Summary				sigma	38.7816							Model Summary				sigma	43.6448							Model Summary				sigma	39.231							Model Summary				sigma	40.1589
logLik	-2274.05							Model Summary				logLik	-2321.78							Model Summary				logLik	-2077.04							Model Summary				logLik	-2333.41							Model Summary				logLik	-2291.01
AIC	4672.1							Model Summary				AIC	4767.56							Model Summary				AIC	4278.07							Model Summary				AIC	4790.82							Model Summary				AIC	4706.03
BIC	4931.65							Model Summary				BIC	5028.62							Model Summary				BIC	4531.73							Model Summary				BIC	5052							Model Summary				BIC	4965.96
REMLcrit	4548.1							Model Summary				REMLcrit	4643.56							Model Summary				REMLcrit	4154.07							Model Summary				REMLcrit	4666.82							Model Summary				REMLcrit	4582.03
df.residual	424							Model Summary				df.residual	436							Model Summary				df.residual	380							Model Summary				df.residual	437							Model Summary				df.residual	427
[truncated: 70 more columns]

## Sheet: 1c
Metric	Group	Metric_new	Detail
Corner Distance	Location	Corner Distance	Distance to closest corner
Port Distance	Location	Port Distance	Snout distance to food port
Port Orientation	Location	Port Orientation	Snout distance to food port / tail base distance to food port
Syllable 0	Other	Pause	Pausing; Freezing-like behavior
Syllable 1	Attend	Attend 1	Rest and sniff
Syllable 10	Turn	Turn 2	Turn with rear movement
Syllable 11	Turn	Turn 3	Turn with supported rear
Syllable 12	Jump	Jump 1	Self-initiated jump
Syllable 13	Turn	Turn 5	Wide turn slow
Syllable 14	Attend	Attend 6	Head turn with sniff around axis
Syllable 15	Rear	Rear 3	Unspported rearing
Syllable 16	Locomote	Locomote 1	Stretch
Syllable 17	Jump	Jump 2	Shock-induced jump / flinch and grooming
Syllable 18	Jump	Jump 3	Shock-induced jump / flinch and grooming
Syllable 19	Locomote	Locomote 2	Move forward
Syllable 2	Attend	Attend 2	Scrunched approaching
Syllable 20	Rear	Rear 4	Lower from rearing
Syllable 21	Locomote	Locomote 3	Scrunch up
Syllable 22	Locomote	Locomote 4	Move forward
Syllable 23	Other	Lick	Licks in food port
Syllable 24	Rear	Rear 5	One-pawed supported rear
Syllable 3	Rear	Rear 1	Supported rearing (floor)
Syllable 4	Attend	Attend 3	Sharp turning for orientation
Syllable 5	Turn	Turn 1	Turn around axis fast
Syllable 6	Attend	Attend 4	Head turn at rest
Syllable 7	Attend	Attend 5	Supported rearing (floor) with sniffing
Syllable 8	Other	Groom	Grooming of belly
Syllable 9	Rear	Rear 2	Supported rearing (wall)

## Sheet: 1d
Predictor	Model	Estimated	Std. err.	t-value	p-value	0.025	0.975
Attend 1	CS- vs CSR	-0.00832767	0.0326428	0.252395	0.81704	0.0955564	-0.112212
Attend 2	CS- vs CSR	0.0225902	0.0413699	-0.558008	0.615775	0.154248	-0.109067
Attend 3	CS- vs CSR	0.0172267	0.0272558	-0.633734	0.571272	0.103967	-0.0695134
Attend 4	CS- vs CSR	0.120232	0.0116789	-10.0477	0.00209892	0.157399	0.0830645
Attend 5	CS- vs CSR	0.0375241	0.0276366	-1.30496	0.282979	0.125476	-0.0504279
Corner Distance	CS- vs CSR	0.0254012	0.0316362	-0.776027	0.494296	0.126082	-0.0752793
Groom	CS- vs CSR	-0.109835	0.0135754	7.92017	0.00419651	-0.0666325	-0.153038
Jump 1	CS- vs CSR	-0.114913	0.0164946	6.82045	0.00644769	-0.0624198	-0.167406
Jump 2	CS- vs CSR	-0.0580597	0.016779	3.37607	0.0432165	-0.00466134	-0.111458
Jump 3	CS- vs CSR	-0.06602	0.0265718	2.40431	0.0955039	0.0185433	-0.150583
Lick	CS- vs CSR	0.0328041	0.0270398	-1.19142	0.319155	0.118857	-0.0532486
Locomote 1	CS- vs CSR	-0.0696786	0.0383056	1.76483	0.175779	0.052227	-0.191584
Locomote 2	CS- vs CSR	-0.0578728	0.027786	2.04927	0.132857	0.0305546	-0.1463
Locomote 3	CS- vs CSR	-0.0262529	0.0339887	0.75094	0.507224	0.0819144	-0.13442
Locomote 4	CS- vs CSR	-0.0355976	0.0407528	0.880055	0.443627	0.0940959	-0.165291
Pause	CS- vs CSR	0.0423369	0.00976422	-4.23121	0.0241535	0.073411	0.0112628
Port Distance	CS- vs CSR	-0.114512	0.0233498	4.79989	0.0172092	-0.040202	-0.188821
Port Orientation	CS- vs CSR	0.137864	0.0050686	-26.6057	0.000116504	0.153994	0.121733
Rear 1	CS- vs CSR	-0.0493298	0.0311697	1.55366	0.218091	0.0498661	-0.148526
Rear 2	CS- vs CSR	-0.0326207	0.0250621	1.27873	0.290942	0.0471381	-0.11238
Rear 3	CS- vs CSR	-0.104019	0.0214209	4.74076	0.017799	-0.0358485	-0.17219
Rear 4	CS- vs CSR	-0.0682948	0.0281217	2.39856	0.095999	0.0212011	-0.157791
Rear 5	CS- vs CSR	-0.0864098	0.0258523	3.27651	0.0465479	-0.00413625	-0.168683
Rear 6	CS- vs CSR	-0.0275832	0.0351553	0.74561	0.510008	0.0842968	-0.139463
Turn 1	CS- vs CSR	-0.0600715	0.0141648	4.13929	0.0255987	-0.0149929	-0.10515
Turn 2	CS- vs CSR	0.0405131	0.0404377	-0.95547	0.409828	0.169204	-0.0881778
Turn 3	CS- vs CSR	0.00877084	0.0227565	-0.358235	0.743892	0.0811921	-0.0636504
Turn 4	CS- vs CSR	-0.0176479	0.0200676	0.855333	0.45524	0.0462162	-0.0815119
Attend 1	CS- vs CSS	0.00560442	0.017676	-0.310603	0.776432	0.0618573	-0.0506485
Attend 2	CS- vs CSS	-0.0567975	0.0271459	2.06614	0.130725	0.0295929	-0.143188
Attend 3	CS- vs CSS	0.0448262	0.0111215	-3.97094	0.0285476	0.0802199	0.00943259
Attend 4	CS- vs CSS	0.069045	0.025856	-2.61323	0.0794634	0.15133	-0.0132403
Attend 5	CS- vs CSS	0.0709189	0.0132014	-5.26876	0.0133262	0.112932	0.0289061
Corner Distance	CS- vs CSS	-0.0305863	0.0110596	2.70982	0.0731759	0.00461035	-0.065783
Groom	CS- vs CSS	-0.0917727	0.0292966	3.08786	0.0538038	0.0014622	-0.185008
Jump 1	CS- vs CSS	-0.0972873	0.0103025	9.27696	0.00265081	-0.0645001	-0.130074
Jump 2	CS- vs CSS	-0.0487799	0.0179904	2.68548	0.0747	0.00847345	-0.106033
Jump 3	CS- vs CSS	-0.0661046	0.0286573	2.28199	0.10674	0.0250957	-0.157305
Lick	CS- vs CSS	-0.0281332	0.00583557	4.72529	0.0179576	-0.00956178	-0.0467046
Locomote 1	CS- vs CSS	-0.0826368	0.0155204	5.2482	0.013471	-0.0332439	-0.13203
Locomote 2	CS- vs CSS	-0.0477917	0.0102985	4.57596	0.0195874	-0.0150172	-0.0805661
Locomote 3	CS- vs CSS	-0.0744785	0.0142135	5.14501	0.0142295	-0.0292447	-0.119712
Locomote 4	CS- vs CSS	-0.0684044	0.014633	4.56601	0.0197027	-0.0218356	-0.114973
Pause	CS- vs CSS	0.174102	0.0179387	-9.55046	0.0024351	0.231191	0.117013
Port Distance	CS- vs CSS	-0.0534786	0.0197013	2.66365	0.0761015	0.00921963	-0.116177
Port Orientation	CS- vs CSS	0.0316746	0.0302664	-1.02502	0.380784	0.127996	-0.0646467
Rear 1	CS- vs CSS	-0.0932172	0.0248403	3.67716	0.0348261	-0.0141643	-0.17227
Rear 2	CS- vs CSS	-0.092887	0.00907091	10.0746	0.00208257	-0.0640193	-0.121755
Rear 3	CS- vs CSS	-0.127271	0.0174077	7.19317	0.00553718	-0.071872	-0.18267
Rear 4	CS- vs CSS	-0.0828626	0.0170639	4.78451	0.0173601	-0.0285576	-0.137168
Rear 5	CS- vs CSS	-0.0758475	0.017043	4.37221	0.0221349	-0.0216093	-0.130086
Rear 6	CS- vs CSS	-0.0623066	0.0275379	2.23645	0.111328	0.0253312	-0.149944
Turn 1	CS- vs CSS	-0.0696968	0.0192995	3.54766	0.0381543	-0.00827715	-0.131116
Turn 2	CS- vs CSS	0.0529734	0.0248458	-2.10572	0.125878	0.132044	-0.0260969
Turn 3	CS- vs CSS	-0.0591049	0.00841724	6.90083	0.00623552	-0.0323175	-0.0858923
Turn 4	CS- vs CSS	-0.0319082	0.0152515	2.05525	0.132097	0.0166289	-0.0804453
Attend 1	CSR vs CSS	0.0194571	0.0255368	-0.727721	0.519438	0.100727	-0.0618125
Attend 2	CSR vs CSS	-0.0992677	0.0106109	9.04306	0.0028558	-0.0654991	-0.133036
Attend 3	CSR vs CSS	0.0452076	0.0378984	-1.14552	0.335091	0.165817	-0.0754021
Attend 4	CSR vs CSS	-0.130661	0.0219494	5.75294	0.0104344	-0.0608081	-0.200513
Attend 5	CSR vs CSS	0.0477601	0.0234553	-1.96184	0.144592	0.122405	-0.0268852
Corner Distance	CSR vs CSS	-0.0799561	0.0318886	2.42718	0.0935657	0.0215276	-0.18144
Groom	CSR vs CSS	0.00998123	0.0282023	-0.343137	0.754134	0.0997334	-0.079771
Jump 1	CSR vs CSS	-0.00503343	0.0158805	0.308108	0.778154	0.0455054	-0.0555723
Jump 2	CSR vs CSS	0.0155672	0.0103516	-1.45292	0.242195	0.0485107	-0.0173764
Jump 3	CSR vs CSS	-0.0414169	0.0304161	1.32283	0.277686	0.0553807	-0.138215
Lick	CSR vs CSS	-0.0678145	0.00562922	11.6309	0.00136518	-0.0498998	-0.0857292
Locomote 1	CSR vs CSS	-0.0266812	0.0348284	0.739424	0.513252	0.0841582	-0.137521
Locomote 2	CSR vs CSS	0.00344428	0.0332271	-0.0917606	0.932672	0.109188	-0.102299
Locomote 3	CSR vs CSS	-0.0987322	0.0451147	2.11681	0.124559	0.0448428	-0.242307
Locomote 4	CSR vs CSS	-0.0777972	0.0428055	1.75305	0.177878	0.058429	-0.214023
Pause	CSR vs CSS	0.254879	0.0187949	-13.1109	0.000958413	0.314693	0.195066
Port Distance	CSR vs CSS	0.0985784	0.0151602	-6.28029	0.00815167	0.146825	0.050332
Port Orientation	CSR vs CSS	-0.149639	0.0124009	11.6634	0.00135399	-0.110174	-0.189105
Rear 1	CSR vs CSS	-0.0771254	0.0270925	2.74519	0.0710282	0.00909504	-0.163346
Rear 2	CSR vs CSS	-0.122071	0.035521	3.33021	0.0447122	-0.009027	-0.235115
Rear 3	CSR vs CSS	-0.0893475	0.0371576	2.3238	0.102727	0.0289046	-0.2076
Rear 4	CSR vs CSS	-0.0737102	0.0388944	1.82296	0.165831	0.050069	-0.197489
Rear 5	CSR vs CSS	-0.0148437	0.0488242	0.284181	0.794757	0.140537	-0.170224
Rear 6	CSR vs CSS	-0.0736587	0.026651	2.66079	0.076287	0.0111567	-0.158474
Turn 1	CSR vs CSS	-0.0320082	0.0255363	1.21474	0.311354	0.0492595	-0.113276
Turn 2	CSR vs CSS	0.0233027	0.0305287	-0.738731	0.513617	0.120459	-0.0738531
Turn 3	CSR vs CSS	-0.0920782	0.0387384	2.29614	0.105361	0.0312049	-0.215361
Turn 4	CSR vs CSS	-0.0330119	0.0194637	1.6466	0.198196	0.0289302	-0.0949541

## Sheet: 1e
Predicted Value Contrasts
contrast_name	contrast	Protocol	Sex	estimate	SE	df	t.ratio	p.value
Contrast: Cue Type | Protocol * Sex
Contrast: Cue Type | Protocol * Sex	CSm - CSR	Mixed	Female	-0.773954	0.0977265	359.495	-7.91959	0
Contrast: Cue Type | Protocol * Sex	CSm - CSS	Mixed	Female	-1.47567	0.0977265	359.495	-15.0999	0
Contrast: Cue Type | Protocol * Sex	CSR - CSS	Mixed	Female	-0.701711	0.0977265	359.495	-7.18035	7.73881e-12
Contrast: Cue Type | Protocol * Sex	CSm - CSR	Appetitive	Female	-1.28124	0.276412	359.495	-4.63526	4.99717e-06
Contrast: Cue Type | Protocol * Sex	CSm - CSS	Aversive	Female	-0.59855	0.276412	359.495	-2.16542	0.0310134
Contrast: Cue Type | Protocol * Sex	CSm - CSR	Mixed	Male	-0.34919	0.0962344	359.495	-3.62853	0.000949844
Contrast: Cue Type | Protocol * Sex	CSm - CSS	Mixed	Male	-1.13034	0.0962344	359.495	-11.7457	0
Contrast: Cue Type | Protocol * Sex	CSR - CSS	Mixed	Male	-0.781147	0.0962344	359.495	-8.11712	0
Contrast: Cue Type | Protocol * Sex	CSm - CSR	Appetitive	Male	-0.546887	0.276412	359.495	-1.97852	0.0486341
Contrast: Cue Type | Protocol * Sex	CSm - CSS	Aversive	Male	-1.25611	0.276412	359.495	-4.54434	7.53993e-06
% Explore LME Model: Predicted Value ~ Sex * Protocol * Cue Type + (1 | id)
term	estimate	std.error	statistic	conf.low	conf.high	group	level	section
(Intercept)	-0.804862	0.0710558	-11.3272	-0.944128	-0.665595			Fixed Effects
SexMale	0.316941	0.0997239	3.17819	0.121486	0.512396			Fixed Effects
ProtocolAppetitive	0.215402	0.210584	1.02288	-0.197335	0.628138			Fixed Effects
ProtocolAversive	0.835105	0.210584	3.96567	0.422369	1.24784			Fixed Effects
type_subCSR	0.773954	0.0977265	7.91959	0.582414	0.965495			Fixed Effects
type_subCSS	1.47567	0.0977265	15.0999	1.28412	1.66721			Fixed Effects
SexMale:ProtocolAppetitive	0.064317	0.297554	0.216153	-0.518877	0.647511			Fixed Effects
SexMale:ProtocolAversive	-0.826333	0.297554	-2.77709	-1.40953	-0.243139			Fixed Effects
SexMale:type_subCSR	-0.424765	0.137155	-3.09696	-0.693584	-0.155946			Fixed Effects
SexMale:type_subCSS	-0.345329	0.137155	-2.5178	-0.614148	-0.0765095			Fixed Effects
ProtocolAppetitive:type_subCSR	0.50729	0.29318	1.7303	-0.0673318	1.08191			Fixed Effects
ProtocolAversive:type_subCSS	-0.877115	0.29318	-2.99173	-1.45174	-0.302494			Fixed Effects
SexMale:ProtocolAppetitive:type_subCSR	-0.309592	0.414269	-0.747321	-1.12155	0.502361			Fixed Effects
SexMale:ProtocolAversive:type_subCSS	1.00289	0.414269	2.42087	0.190939	1.81485			Fixed Effects
(Intercept)	-0.0226404	0.0864464				id	202	Random Effects
(Intercept)	-0.00994634	0.0864464				id	203	Random Effects
(Intercept)	-0.00659966	0.0864464				id	204	Random Effects
(Intercept)	-0.0484353	0.0864464				id	205	Random Effects
(Intercept)	-0.0118378	0.0864464				id	206	Random Effects
(Intercept)	-0.0100188	0.0864464				id	207	Random Effects
(Intercept)	-0.00938014	0.0864464				id	208	Random Effects
(Intercept)	-0.00901028	0.0864464				id	211	Random Effects
(Intercept)	0.0126463	0.0864464				id	212	Random Effects
(Intercept)	0.0680562	0.0864464				id	213	Random Effects
(Intercept)	0.00106031	0.0864464				id	214	Random Effects
(Intercept)	-0.00836017	0.0864464				id	215	Random Effects
(Intercept)	0.0200145	0.0864464				id	216	Random Effects
(Intercept)	-0.0141499	0.0864464				id	217	Random Effects
(Intercept)	0.0385868	0.0864464				id	218	Random Effects
(Intercept)	-0.0540671	0.0864464				id	221	Random Effects
(Intercept)	0.0214693	0.0864464				id	222	Random Effects
(Intercept)	0.0562239	0.0864464				id	223	Random Effects
(Intercept)	0.0129498	0.0864464				id	224	Random Effects
(Intercept)	-0.0250312	0.0864464				id	225	Random Effects
(Intercept)	-0.0307076	0.0864464				id	226	Random Effects
(Intercept)	-0.0554649	0.0864464				id	227	Random Effects
(Intercept)	0.00965726	0.0864464				id	228	Random Effects
(Intercept)	-0.0199211	0.0864464				id	241	Random Effects
(Intercept)	-0.000823188	0.0864464				id	242	Random Effects
(Intercept)	-0.0198885	0.0864464				id	243	Random Effects
(Intercept)	0.0112239	0.0864464				id	244	Random Effects
(Intercept)	0.0302933	0.0864464				id	245	Random Effects
(Intercept)	0.000331936	0.0864464				id	246	Random Effects
(Intercept)	0.00256671	0.0864464				id	247	Random Effects
(Intercept)	-0.0262251	0.0864464				id	248	Random Effects
(Intercept)	0.0167887	0.0864464				id	251	Random Effects
(Intercept)	-0.0118611	0.0864464				id	252	Random Effects
(Intercept)	0.0309667	0.0864464				id	253	Random Effects
(Intercept)	0.0131719	0.0864464				id	254	Random Effects
(Intercept)	0.0242232	0.0864464				id	255	Random Effects
(Intercept)	0.0151502	0.0864464				id	256	Random Effects
(Intercept)	0.124134	0.0864464				id	257	Random Effects
(Intercept)	-0.00487866	0.0864464				id	258	Random Effects
(Intercept)	-0.0547952	0.0864464				id	261	Random Effects
(Intercept)	0.019355	0.0864464				id	262	Random Effects
(Intercept)	-0.0119759	0.0864464				id	263	Random Effects
(Intercept)	0.0221283	0.0864464				id	264	Random Effects
(Intercept)	0.0254	0.0864464				id	265	Random Effects
(Intercept)	-0.0254649	0.0864464				id	266	Random Effects
(Intercept)	0.00587412	0.0864464				id	267	Random Effects
(Intercept)	0.105184	0.0864464				id	268	Random Effects
(Intercept)	-0.00285988	0.0910117				id	301	Random Effects
(Intercept)	0.0259116	0.0910117				id	302	Random Effects
(Intercept)	-0.0053633	0.0910117				id	303	Random Effects
(Intercept)	0.000828594	0.0910117				id	304	Random Effects
(Intercept)	-0.00994912	0.0910117				id	305	Random Effects
(Intercept)	0.000602456	0.0910117				id	306	Random Effects
(Intercept)	-0.0178053	0.0910117				id	307	Random Effects
(Intercept)	0.00863499	0.0910117				id	308	Random Effects
(Intercept)	0.0249681	0.0910117				id	311	Random Effects
(Intercept)	-0.0116277	0.0910117				id	312	Random Effects
(Intercept)	0.00346258	0.0910117				id	313	Random Effects
(Intercept)	-0.0176395	0.0910117				id	314	Random Effects
(Intercept)	-0.00377325	0.0910117				id	315	Random Effects
(Intercept)	0.00628353	0.0910117				id	316	Random Effects
(Intercept)	-0.0173155	0.0910117				id	317	Random Effects
(Intercept)	0.0156417	0.0910117				id	318	Random Effects
(Intercept)	-0.0179625	0.0910117				id	401	Random Effects
(Intercept)	0.00332904	0.0910117				id	402	Random Effects
(Intercept)	-0.00424224	0.0910117				id	403	Random Effects
(Intercept)	0.0042751	0.0910117				id	404	Random Effects
(Intercept)	-0.00435662	0.0910117				id	405	Random Effects
(Intercept)	0.0236007	0.0910117				id	406	Random Effects
(Intercept)	-0.00476545	0.0910117				id	407	Random Effects
(Intercept)	0.000121893	0.0910117				id	408	Random Effects
(Intercept)	0.0160378	0.0910117				id	411	Random Effects
(Intercept)	-0.0250479	0.0910117				id	412	Random Effects
(Intercept)	0.0053042	0.0910117				id	413	Random Effects
(Intercept)	-0.00519921	0.0910117				id	414	Random Effects
(Intercept)	0.00230101	0.0910117				id	415	Random Effects
(Intercept)	0.0103226	0.0910117				id	416	Random Effects
(Intercept)	-0.0136945	0.0910117				id	417	Random Effects
(Intercept)	0.00997607	0.0910117				id	418	Random Effects
(Intercept)	0.0495152	0.0864464				id	551	Random Effects
(Intercept)	0.0337031	0.0864464				id	552	Random Effects
(Intercept)	-0.0209527	0.0864464				id	553	Random Effects
(Intercept)	-0.0394516	0.0864464				id	554	Random Effects
(Intercept)	-0.030261	0.0864464				id	555	Random Effects
(Intercept)	0.0263325	0.0864464				id	561	Random Effects
(Intercept)	-0.0606826	0.0864464				id	562	Random Effects
(Intercept)	-0.0225043	0.0864464				id	563	Random Effects
(Intercept)	-0.000210311	0.0864464				id	564	Random Effects
(Intercept)	-0.101109	0.0864464				id	651	Random Effects
(Intercept)	-0.00798343	0.0864464				id	652	Random Effects
(Intercept)	0.0533325	0.0864464				id	653	Random Effects
(Intercept)	-0.0339221	0.0864464				id	654	Random Effects
(Intercept)	-0.0275479	0.0864464				id	655	Random Effects
(Intercept)	0.0172068	0.0864464				id	661	Random Effects
(Intercept)	0.0320157	0.0864464				id	662	Random Effects
(Intercept)	-0.0510229	0.0864464				id	663	Random Effects
(Intercept)	-0.0124311	0.0864464				id	664	Random Effects
nobs	454							Model Summary
sigma	0.552825							Model Summary
logLik	-390.157							Model Summary
AIC	812.315							Model Summary
BIC	878.204							Model Summary
REMLcrit	780.315							Model Summary
df.residual	438							Model Summary

## Sheet: 1f
Habituation Day Contrast										Protocol contrasts
contrast_name	contrast	estimate	SE	df	t.ratio	p.value				contrast_name	contrast	Protocol	estimate	SE	df	t.ratio	p.value
Contrast: Sex										Contrast: Sex | Protocol
Contrast: Sex	Female - Male	-9.47917	2.21431	30	-4.28086	0.000175561				Contrast: Sex | Protocol	Female - Male	Mixed	-0.440706	1.18095	94.271	-0.373179	0.709853
										Contrast: Sex | Protocol	Female - Male	Appetitive	-5.95908	2.3284	85.8985	-2.5593	0.0122392
										Contrast: Sex | Protocol	Female - Male	Aversive	-4.18779	2.34753	88.0913	-1.78392	0.0778805
% Explore Linear Model: Explore ~ Sex										% Explore LME Model: Explore ~ Sex * Protocol * time + (1 | id)
Residuals:										term	estimate	std.error	statistic	conf.low	conf.high	group	level	section
Min	1Q	Median	3Q	Max						(Intercept)	17.8615	1.21479	14.7033	15.4805	20.2424			Fixed Effects
-15.5958	-4.0615	-0.2896	4.3083	11.6708						SexMale	1.62713	1.70567	0.953955	-1.71592	4.97017			Fixed Effects
										ProtocolAppetitive	-4.90522	2.71831	-1.80451	-10.233	0.422568			Fixed Effects
Coefficients:										ProtocolAversive	-2.9061	2.86075	-1.01585	-8.51307	2.70088			Fixed Effects
	Estimate	Std. Errpr	t value	Pr(>|t|)						timeLate Training	0.56812	1.69777	0.334627	-2.75944	3.89568			Fixed Effects
Intercept	19.283	1.566	12.316	2.91e-13						timeRecall	3.92199	1.5537	2.5243	0.876803	6.96718			Fixed Effects
SexMale	9.479	2.214	4.281	0.000176						SexMale:ProtocolAppetitive	4.87616	3.83878	1.27024	-2.64771	12.4			Fixed Effects
										SexMale:ProtocolAversive	1.93	3.94093	0.489732	-5.79409	9.65409			Fixed Effects
Residual standard error: 6.263 on 30 degrees of freedom										SexMale:timeLate Training	-2.23208	2.31226	-0.965326	-6.76403	2.29986			Fixed Effects
Multiple R-squared: 0.3792, Adjusted R-squared: 0.3585										SexMale:timeRecall	-1.32718	2.1779	-0.609387	-5.59578	2.94142			Fixed Effects
F-statistic: 18.33 on 1 and 30 DF, p-value: 0.0001756										ProtocolAppetitive:timeLate Training	5.51938	3.53421	1.5617	-1.40754	12.4463			Fixed Effects
										ProtocolAversive:timeLate Training	-4.52349	3.64491	-1.24104	-11.6674	2.6204			Fixed Effects
										ProtocolAppetitive:timeRecall	2.60509	3.4673	0.751331	-4.1907	9.40088			Fixed Effects
										ProtocolAversive:timeRecall	-4.7857	3.58007	-1.33676	-11.8025	2.23111			Fixed Effects
										SexMale:ProtocolAppetitive:timeLate Training	4.43192	4.95611	0.894234	-5.28187	14.1457			Fixed Effects
										SexMale:ProtocolAversive:timeLate Training	4.76871	5.03564	0.94699	-5.10097	14.6384			Fixed Effects
										SexMale:ProtocolAppetitive:timeRecall	-2.50527	4.89486	-0.511817	-12.099	7.08848			Fixed Effects
										SexMale:ProtocolAversive:timeRecall	0.682553	4.97538	0.137186	-9.06901	10.4341			Fixed Effects
										(Intercept)	-0.30267	2.46395				id	201	Random Effects
										(Intercept)	4.61888	2.28973				id	202	Random Effects
										(Intercept)	-0.238659	2.46395				id	203	Random Effects
										(Intercept)	2.77727	2.28973				id	204	Random Effects
										(Intercept)	1.26344	2.28973				id	205	Random Effects
										(Intercept)	1.83202	2.28973				id	206	Random Effects
										(Intercept)	0.141422	2.28973				id	207	Random Effects
										(Intercept)	0.958794	2.46395				id	208	Random Effects
										(Intercept)	-2.97039	2.28973				id	211	Random Effects
										(Intercept)	0.895865	2.28973				id	212	Random Effects
										(Intercept)	0.271974	2.46395				id	213	Random Effects
										(Intercept)	-0.721802	2.28973				id	214	Random Effects
										(Intercept)	0.501788	2.28973				id	215	Random Effects
										(Intercept)	0.364235	2.28973				id	216	Random Effects
										(Intercept)	0.206041	2.28973				id	217	Random Effects
										(Intercept)	-0.727482	2.46395				id	218	Random Effects
										(Intercept)	0.876539	2.28973				id	221	Random Effects
										(Intercept)	-0.0649321	2.28973				id	222	Random Effects
										(Intercept)	-0.451656	2.46395				id	223	Random Effects
										(Intercept)	-2.84722	2.28973				id	224	Random Effects
										(Intercept)	2.23427	2.28973				id	225	Random Effects
										(Intercept)	0.950824	2.28973				id	226	Random Effects
										(Intercept)	-0.897732	2.28973				id	227	Random Effects
										(Intercept)	0.442256	2.28973				id	228	Random Effects
										(Intercept)	-1.40729	2.28973				id	241	Random Effects
										(Intercept)	-0.696877	2.46395				id	242	Random Effects
										(Intercept)	-1.06809	2.46395				id	243	Random Effects
										(Intercept)	1.41766	2.28973				id	244	Random Effects
										(Intercept)	0.812134	2.28973				id	245	Random Effects
										(Intercept)	3.43473	2.28973				id	246	Random Effects
										(Intercept)	-0.317845	2.28973				id	247	Random Effects
										(Intercept)	1.41919	2.28973				id	248	Random Effects
										(Intercept)	-2.33833	2.28973				id	251	Random Effects
										(Intercept)	-2.73331	2.46395				id	252	Random Effects
										(Intercept)	-0.224299	2.46395				id	253	Random Effects
										(Intercept)	2.61518	2.28973				id	254	Random Effects
										(Intercept)	-1.22956	2.28973				id	255	Random Effects
										(Intercept)	-0.334897	2.28973				id	256	Random Effects
										(Intercept)	-3.90206	2.28973				id	257	Random Effects
										(Intercept)	-2.44046	2.28973				id	258	Random Effects
										(Intercept)	0.0955573	2.28973				id	261	Random Effects
										(Intercept)	3.95256	2.46395				id	262	Random Effects
										(Intercept)	1.572	2.46395				id	263	Random Effects
										(Intercept)	-0.280724	2.28973				id	264	Random Effects
										(Intercept)	-1.29807	2.28973				id	265	Random Effects
										(Intercept)	-0.657748	2.28973				id	266	Random Effects
										(Intercept)	0.338089	2.28973				id	267	Random Effects
										(Intercept)	-2.6178	2.46395				id	268	Random Effects
										(Intercept)	1.3059	2.28973				id	301	Random Effects
										(Intercept)	-3.88928	2.28973				id	302	Random Effects
										(Intercept)	-1.69071	2.28973				id	303	Random Effects
										(Intercept)	0.132721	2.28973				id	304	Random Effects
										(Intercept)	1.51962	2.28973				id	305	Random Effects
										(Intercept)	-0.462962	2.28973				id	306	Random Effects
										(Intercept)	2.05164	2.28973				id	307	Random Effects
										(Intercept)	1.03307	2.28973				id	308	Random Effects
										(Intercept)	0.606745	2.28973				id	311	Random Effects
										(Intercept)	-0.375451	2.28973				id	312	Random Effects
										(Intercept)	-0.25495	2.28973				id	313	Random Effects
										(Intercept)	1.09557	2.28973				id	314	Random Effects
										(Intercept)	-3.56531	2.28973				id	315	Random Effects
										(Intercept)	2.87125	2.28973				id	316	Random Effects
										(Intercept)	-0.0594202	2.28973				id	317	Random Effects
										(Intercept)	-0.318431	2.28973				id	318	Random Effects
										(Intercept)	1.2577	2.28973				id	401	Random Effects
										(Intercept)	-0.12237	2.28973				id	402	Random Effects
										(Intercept)	-0.174663	2.28973				id	403	Random Effects
										(Intercept)	-1.10457	2.28973				id	404	Random Effects
										(Intercept)	3.40853	2.28973				id	405	Random Effects
										(Intercept)	-2.06402	2.28973				id	406	Random Effects
										(Intercept)	-1.2624	2.46395				id	407	Random Effects
										(Intercept)	0.0617913	2.28973				id	408	Random Effects
										(Intercept)	-1.76204	2.28973				id	411	Random Effects
										(Intercept)	-1.13907	2.28973				id	412	Random Effects
										(Intercept)	0.736646	2.28973				id	413	Random Effects
										(Intercept)	2.66921	2.28973				id	414	Random Effects
										(Intercept)	4.62905	2.28973				id	415	Random Effects
										(Intercept)	0.263738	2.28973				id	416	Random Effects
										(Intercept)	-3.78554	2.28973				id	417	Random Effects
										(Intercept)	-1.61198	2.28973				id	418	Random Effects
										(Intercept)	-1.06796	2.28973				id	551	Random Effects
										(Intercept)	-2.7419	2.28973				id	552	Random Effects
										(Intercept)	-2.45883	2.28973				id	553	Random Effects
										(Intercept)	-0.506232	2.46395				id	554	Random Effects
										(Intercept)	1.43357	2.28973				id	555	Random Effects
										(Intercept)	3.07852	2.28973				id	561	Random Effects
										(Intercept)	2.71669	2.28973				id	562	Random Effects
										(Intercept)	-2.15303	2.28973				id	563	Random Effects
										(Intercept)	-1.04806	2.28973				id	564	Random Effects
										(Intercept)	1.38622	2.28973				id	651	Random Effects
										(Intercept)	-0.64979	2.28973				id	652	Random Effects
										(Intercept)	-0.736187	2.28973				id	653	Random Effects
										(Intercept)	0.597279	2.28973				id	654	Random Effects
										(Intercept)	-0.0711592	2.28973				id	655	Random Effects
										(Intercept)	-1.62403	2.28973				id	661	Random Effects
										(Intercept)	-0.95559	2.28973				id	662	Random Effects
										(Intercept)	0.255102	2.28973				id	663	Random Effects
										(Intercept)	1.32256	2.28973				id	664	Random Effects
										nobs	279							Model Summary
										sigma	6.19943							Model Summary
										logLik	-892.3							Model Summary
										AIC	1824.6							Model Summary
										BIC	1897.22							Model Summary
										REMLcrit	1784.6							Model Summary
										df.residual	259							Model Summary

## Sheet: 1g
												% Pause Contrasts
contrast_name	contrast	day	Sex	estimate	SE	df	t.ratio	p.value				contrast_name	contrast	day	Sex	estimate	SE	df	t.ratio	p.value
Contrast: Protocol | Sex												Contrast: Protocol | Sex
Contrast: Protocol | Sex	Mixed - Aversive		Female	6.00022	1.79739	76.9522	3.33829	0.00130112				Contrast: Protocol | Sex	Mixed - Aversive		Female	-18.1319	2.92386	77.4841	-6.20136	2.53727e-08
Contrast: Protocol | Sex	Mixed - Aversive		Male	2.2662	1.75881	72.0359	1.28849	0.2017				Contrast: Protocol | Sex	Mixed - Aversive		Male	-6.21438	2.87897	73.6048	-2.15855	0.0341463
Contrast: Protocol | Sex * Day												Contrast: Protocol | Sex * Day
Contrast: Protocol | Sex * Day	Mixed - Aversive	01	Female	2.88049	2.80979	213.091	1.02516	0.306449				Contrast: Protocol | Sex * Day	Mixed - Aversive	01	Female	-14.555	4.10289	194.909	-3.5475	0.000487183
Contrast: Protocol | Sex * Day	Mixed - Aversive	01	Male	0.976096	2.65742	209.764	0.36731	0.713758				Contrast: Protocol | Sex * Day	Mixed - Aversive	01	Male	-9.44363	3.90434	185.439	-2.41875	0.0165403
Contrast: Protocol | Sex * Day	Mixed - Aversive	13	Female	7.4269	2.75054	211.921	2.70017	0.00749039				Contrast: Protocol | Sex * Day	Mixed - Aversive	13	Female	-21.0099	4.02565	191.453	-5.21901	4.65691e-07
Contrast: Protocol | Sex * Day	Mixed - Aversive	13	Male	0.743266	2.68256	210.399	0.277074	0.781995				Contrast: Protocol | Sex * Day	Mixed - Aversive	13	Male	-8.07453	3.93701	187.154	-2.05093	0.0416673
Contrast: Protocol | Sex * Day	Mixed - Aversive	15	Female	7.69327	2.6653	209.966	2.88645	0.00430328				Contrast: Protocol | Sex * Day	Mixed - Aversive	15	Female	-18.8309	3.91458	185.982	-4.81044	3.10265e-06
Contrast: Protocol | Sex * Day	Mixed - Aversive	15	Male	5.07924	2.65742	209.764	1.91134	0.0573234				Contrast: Protocol | Sex * Day	Mixed - Aversive	15	Male	-1.12498	3.90434	185.439	-0.288136	0.773564
% Explore LME Model: Explore ~ Protocol * Sex * as.factor(day) + (1 | id)												% Pause LME Model: Pause ~ Protocol * Sex * as.factor(day) + (1 | id)
term	estimate	std.error	statistic	conf.low	conf.high	group	level	section				term	estimate	std.error	statistic	conf.low	conf.high	group	level	section
(Intercept)	17.8639	1.19131	14.9952	15.529	20.1989			Fixed Effects				(Intercept)	20.4347	1.74744	11.6941	17.0098	23.8597			Fixed Effects
ProtocolAversive	-2.88049	2.80746	-1.02601	-8.38301	2.62203			Fixed Effects				ProtocolAversive	14.555	4.10055	3.54952	6.51807	22.5919			Fixed Effects
SexMale	1.62466	1.67247	0.971415	-1.65332	4.90264			Fixed Effects				SexMale	1.31537	2.45519	0.53575	-3.49672	6.12746			Fixed Effects
as.factor(day)13	0.562966	1.69495	0.332143	-2.75908	3.88501			Fixed Effects				as.factor(day)13	-0.163416	2.26533	-0.0721376	-4.60338	4.27655			Fixed Effects
as.factor(day)15	3.921	1.55392	2.5233	0.875374	6.96662			Fixed Effects				as.factor(day)15	-6.63228	2.06095	-3.21807	-10.6717	-2.5929			Fixed Effects
ProtocolAversive:SexMale	1.90439	3.86571	0.492638	-5.67225	9.48104			Fixed Effects				ProtocolAversive:SexMale	-5.11137	5.66201	-0.902748	-16.2087	5.98597			Fixed Effects
ProtocolAversive:as.factor(day)13	-4.54641	3.64279	-1.24806	-11.6861	2.59332			Fixed Effects				ProtocolAversive:as.factor(day)13	6.45491	4.84631	1.33192	-3.04369	15.9535			Fixed Effects
ProtocolAversive:as.factor(day)15	-4.81278	3.57934	-1.3446	-11.8282	2.20261			Fixed Effects				ProtocolAversive:as.factor(day)15	4.27586	4.75421	0.899384	-5.04222	13.5939			Fixed Effects
SexMale:as.factor(day)13	-2.21455	2.31014	-0.958622	-6.74233	2.31324			Fixed Effects				SexMale:as.factor(day)13	3.27001	3.07782	1.06245	-2.7624	9.30242			Fixed Effects
SexMale:as.factor(day)15	-1.32619	2.17862	-0.608728	-5.59621	2.94383			Fixed Effects				SexMale:as.factor(day)15	4.75301	2.88715	1.64627	-0.905694	10.4117			Fixed Effects
ProtocolAversive:SexMale:as.factor(day)13	4.77924	5.03509	0.949187	-5.08936	14.6478			Fixed Effects				ProtocolAversive:SexMale:as.factor(day)13	-7.82401	6.68517	-1.17035	-20.9267	5.27868			Fixed Effects
ProtocolAversive:SexMale:as.factor(day)15	0.709635	4.97612	0.142608	-9.04339	10.4627			Fixed Effects				ProtocolAversive:SexMale:as.factor(day)15	-12.5945	6.59956	-1.90839	-25.5294	0.340382			Fixed Effects
(Intercept)	-0.25552	2.26524				id	201	Random Effects				(Intercept)	0.0104637	4.00894				id	201	Random Effects
(Intercept)	3.98427	2.12778				id	202	Random Effects				(Intercept)	-3.79544	3.60266				id	202	Random Effects
(Intercept)	-0.20203	2.26524				id	203	Random Effects				(Intercept)	3.34682	4.00894				id	203	Random Effects
(Intercept)	2.39563	2.12778				id	204	Random Effects				(Intercept)	-5.03812	3.60266				id	204	Random Effects
(Intercept)	1.08844	2.12778				id	205	Random Effects				(Intercept)	-3.21386	3.60266				id	205	Random Effects
(Intercept)	1.57891	2.12778				id	206	Random Effects				(Intercept)	-0.342898	3.60266				id	206	Random Effects
(Intercept)	0.120539	2.12778				id	207	Random Effects				(Intercept)	0.284899	3.60266				id	207	Random Effects
(Intercept)	0.809526	2.26524				id	208	Random Effects				(Intercept)	-3.04878	4.00894				id	208	Random Effects
(Intercept)	-2.56252	2.12778				id	211	Random Effects				(Intercept)	-0.997396	3.60266				id	211	Random Effects
(Intercept)	0.772658	2.12778				id	212	Random Effects				(Intercept)	5.49021	3.60266				id	212	Random Effects
(Intercept)	0.229107	2.26524				id	213	Random Effects				(Intercept)	-2.23036	4.00894				id	213	Random Effects
(Intercept)	-0.622801	2.12778				id	214	Random Effects				(Intercept)	1.82791	3.60266				id	214	Random Effects
(Intercept)	0.431403	2.12778				id	215	Random Effects				(Intercept)	-4.31544	3.60266				id	215	Random Effects
(Intercept)	0.312745	2.12778				id	216	Random Effects				(Intercept)	2.58747	3.60266				id	216	Random Effects
(Intercept)	0.176281	2.12778				id	217	Random Effects				(Intercept)	-4.29864	3.60266				id	217	Random Effects
(Intercept)	-0.614225	2.26524				id	218	Random Effects				(Intercept)	2.21083	4.00894				id	218	Random Effects
(Intercept)	0.755987	2.12778				id	221	Random Effects				(Intercept)	-6.92059	3.60266				id	221	Random Effects
(Intercept)	-0.0561606	2.12778				id	222	Random Effects				(Intercept)	0.27198	3.60266				id	222	Random Effects
(Intercept)	-0.381866	2.26524				id	223	Random Effects				(Intercept)	7.05726	4.00894				id	223	Random Effects
(Intercept)	-2.45626	2.12778				id	224	Random Effects				(Intercept)	5.63827	3.60266				id	224	Random Effects
(Intercept)	1.92591	2.12778				id	225	Random Effects				(Intercept)	-4.26573	3.60266				id	225	Random Effects
(Intercept)	0.818758	2.12778				id	226	Random Effects				(Intercept)	-1.92628	3.60266				id	226	Random Effects
(Intercept)	-0.775874	2.12778				id	227	Random Effects				(Intercept)	7.63441	3.60266				id	227	Random Effects
(Intercept)	0.380049	2.12778				id	228	Random Effects				(Intercept)	3.31983	3.60266				id	228	Random Effects
(Intercept)	-1.21413	2.12778				id	241	Random Effects				(Intercept)	-1.59388	3.60266				id	241	Random Effects
(Intercept)	-0.588911	2.26524				id	242	Random Effects				(Intercept)	-0.294781	4.00894				id	242	Random Effects
(Intercept)	-0.902336	2.26524				id	243	Random Effects				(Intercept)	-0.147854	4.00894				id	243	Random Effects
(Intercept)	1.22277	2.12778				id	244	Random Effects				(Intercept)	-4.76072	3.60266				id	244	Random Effects
(Intercept)	0.69912	2.12778				id	245	Random Effects				(Intercept)	-1.23518	3.60266				id	245	Random Effects
(Intercept)	2.96147	2.12778				id	246	Random Effects				(Intercept)	-0.590591	3.60266				id	246	Random Effects
(Intercept)	-0.275642	2.12778				id	247	Random Effects				(Intercept)	1.50032	3.60266				id	247	Random Effects
(Intercept)	1.22278	2.12778				id	248	Random Effects				(Intercept)	1.23415	3.60266				id	248	Random Effects
(Intercept)	-2.01728	2.12778				id	251	Random Effects				(Intercept)	3.17481	3.60266				id	251	Random Effects
(Intercept)	-2.3083	2.26524				id	252	Random Effects				(Intercept)	1.04146	4.00894				id	252	Random Effects
(Intercept)	-0.189905	2.26524				id	253	Random Effects				(Intercept)	5.35398	4.00894				id	253	Random Effects
(Intercept)	2.25581	2.12778				id	254	Random Effects				(Intercept)	-1.36611	3.60266				id	254	Random Effects
(Intercept)	-1.06212	2.12778				id	255	Random Effects				(Intercept)	1.11389	3.60266				id	255	Random Effects
(Intercept)	-0.290352	2.12778				id	256	Random Effects				(Intercept)	-0.196139	3.60266				id	256	Random Effects
(Intercept)	-3.36751	2.12778				id	257	Random Effects				(Intercept)	11.2488	3.60266				id	257	Random Effects
(Intercept)	-2.10669	2.12778				id	258	Random Effects				(Intercept)	6.57586	3.60266				id	258	Random Effects
(Intercept)	0.0822835	2.12778				id	261	Random Effects				(Intercept)	-2.97767	3.60266				id	261	Random Effects
(Intercept)	3.33668	2.26524				id	262	Random Effects				(Intercept)	-2.183	4.00894				id	262	Random Effects
(Intercept)	1.32674	2.26524				id	263	Random Effects				(Intercept)	-2.04328	4.00894				id	263	Random Effects
(Intercept)	-0.24231	2.12778				id	264	Random Effects				(Intercept)	-4.53945	3.60266				id	264	Random Effects
(Intercept)	-1.12122	2.12778				id	265	Random Effects				(Intercept)	4.2463	3.60266				id	265	Random Effects
(Intercept)	-0.568855	2.12778				id	266	Random Effects				(Intercept)	0.939112	3.60266				id	266	Random Effects
(Intercept)	0.29019	2.12778				id	267	Random Effects				(Intercept)	7.75062	3.60266				id	267	Random Effects
(Intercept)	-2.21025	2.26524				id	268	Random Effects				(Intercept)	1.45038	4.00894				id	268	Random Effects
(Intercept)	1.12652	2.12778				id	301	Random Effects				(Intercept)	-4.2596	3.60266				id	301	Random Effects
(Intercept)	-3.35503	2.12778				id	302	Random Effects				(Intercept)	10.4249	3.60266				id	302	Random Effects
(Intercept)	-1.45846	2.12778				id	303	Random Effects				(Intercept)	0.012026	3.60266				id	303	Random Effects
(Intercept)	0.11449	2.12778				id	304	Random Effects				(Intercept)	-0.9725	3.60266				id	304	Random Effects
(Intercept)	1.31088	2.12778				id	305	Random Effects				(Intercept)	-3.32638	3.60266				id	305	Random Effects
(Intercept)	-0.399368	2.12778				id	306	Random Effects				(Intercept)	-0.786499	3.60266				id	306	Random Effects
(Intercept)	1.76982	2.12778				id	307	Random Effects				(Intercept)	0.605307	3.60266				id	307	Random Effects
(Intercept)	0.891162	2.12778				id	308	Random Effects				(Intercept)	-1.69727	3.60266				id	308	Random Effects
(Intercept)	1.08164	2.12778				id	401	Random Effects				(Intercept)	-0.712772	3.60266				id	401	Random Effects
(Intercept)	-0.108865	2.12778				id	402	Random Effects				(Intercept)	6.31681	3.60266				id	402	Random Effects
(Intercept)	-0.153975	2.12778				id	403	Random Effects				(Intercept)	-3.85235	3.60266				id	403	Random Effects
(Intercept)	-0.956143	2.12778				id	404	Random Effects				(Intercept)	-4.02873	3.60266				id	404	Random Effects
(Intercept)	2.93702	2.12778				id	405	Random Effects				(Intercept)	-4.37508	3.60266				id	405	Random Effects
(Intercept)	-1.78381	2.12778				id	406	Random Effects				(Intercept)	4.00782	3.60266				id	406	Random Effects
(Intercept)	-1.06587	2.26524				id	407	Random Effects				(Intercept)	1.12826	4.00894				id	407	Random Effects
(Intercept)	0.0499995	2.12778				id	408	Random Effects				(Intercept)	1.51604	3.60266				id	408	Random Effects
(Intercept)	-0.921407	2.12778				id	551	Random Effects				(Intercept)	0.886672	3.60266				id	551	Random Effects
(Intercept)	-2.36541	2.12778				id	552	Random Effects				(Intercept)	7.91625	3.60266				id	552	Random Effects
(Intercept)	-2.12123	2.12778				id	553	Random Effects				(Intercept)	0.525893	3.60266				id	553	Random Effects
(Intercept)	-0.427259	2.26524				id	554	Random Effects				(Intercept)	-0.21415	4.00894				id	554	Random Effects
(Intercept)	1.2365	2.12778				id	555	Random Effects				(Intercept)	-1.07116	3.60266				id	555	Random Effects
(Intercept)	2.6555	2.12778				id	561	Random Effects				(Intercept)	1.54089	3.60266				id	561	Random Effects
(Intercept)	2.34337	2.12778				id	562	Random Effects				(Intercept)	-1.68322	3.60266				id	562	Random Effects
(Intercept)	-1.85743	2.12778				id	563	Random Effects				(Intercept)	1.92251	3.60266				id	563	Random Effects
(Intercept)	-0.904246	2.12778				id	564	Random Effects				(Intercept)	-4.1482	3.60266				id	564	Random Effects
(Intercept)	1.19435	2.12778				id	651	Random Effects				(Intercept)	-5.43465	3.60266				id	651	Random Effects
(Intercept)	-0.56199	2.12778				id	652	Random Effects				(Intercept)	-4.6233	3.60266				id	652	Random Effects
(Intercept)	-0.63652	2.12778				id	653	Random Effects				(Intercept)	7.24072	3.60266				id	653	Random Effects
(Intercept)	0.513778	2.12778				id	654	Random Effects				(Intercept)	-5.7361	3.60266				id	654	Random Effects
(Intercept)	-0.0628419	2.12778				id	655	Random Effects				(Intercept)	-1.34582	3.60266				id	655	Random Effects
(Intercept)	-1.4024	2.12778				id	661	Random Effects				(Intercept)	-1.49975	3.60266				id	661	Random Effects
(Intercept)	-0.825784	2.12778				id	662	Random Effects				(Intercept)	-4.73073	3.60266				id	662	Random Effects
(Intercept)	0.218603	2.12778				id	663	Random Effects				(Intercept)	-8.2359	3.60266				id	663	Random Effects
(Intercept)	1.13943	2.12778				id	664	Random Effects				(Intercept)	-4.2978	3.60266				id	664	Random Effects
nobs	231							Model Summary				nobs	231							Model Summary
sigma	6.2027							Model Summary				sigma	8.21304							Model Summary
logLik	-742.886							Model Summary				logLik	-820.298							Model Summary
AIC	1513.77							Model Summary				AIC	1668.6							Model Summary
BIC	1561.97							Model Summary				BIC	1716.79							Model Summary
REMLcrit	1485.77							Model Summary				REMLcrit	1640.6							Model Summary
df.residual	217							Model Summary				df.residual	217							Model Summary

## Sheet: 1h
Pre-Cue Contrasts													CS- Contrasts													CSS Contrasts
contrast_name	contrast	Protocol	day	Sex	estimate	SE	df	t.ratio	p.value				contrast_name	contrast	Protocol	day	Sex	estimate	SE	df	t.ratio	p.value				contrast_name	contrast	Protocol	day	Sex	estimate	SE	df	t.ratio	p.value
Contrast: Window | Protocol * Day * Sex													Contrast: Window | Protocol * Day * Sex													Contrast: Window | Protocol * Day * Sex
Contrast: Window | Protocol * Day * Sex	early - late	Mixed	D01	Female	-11.6484	3.44509	360.703	-3.38117	0.000800814				Contrast: Window | Protocol * Day * Sex	early - late	Mixed	D01	Female	-6.49553	3.95728	360.706	-1.64141	0.101584				Contrast: Window | Protocol * Day * Sex	early - late	Mixed	D01	Female	-20.2808	3.55918	358.464	-5.69817	2.52921e-08
Contrast: Window | Protocol * Day * Sex	early - late	Aversive	D01	Female	-44.9107	7.36591	360.703	-6.0971	2.77933e-09				Contrast: Window | Protocol * Day * Sex	early - late	Aversive	D01	Female	-23	8.22286	356.474	-2.79708	0.00543647				Contrast: Window | Protocol * Day * Sex	early - late	Aversive	D01	Female	-45.3214	7.42146	356.654	-6.10681	2.6572e-09
Contrast: Window | Protocol * Day * Sex	early - late	Mixed	D13	Female	-11.1458	3.97805	360.703	-2.80184	0.00535538				Contrast: Window | Protocol * Day * Sex	early - late	Mixed	D13	Female	-4.10938	4.44085	356.474	-0.925357	0.355406				Contrast: Window | Protocol * Day * Sex	early - late	Mixed	D13	Female	-3.84896	4.00804	356.654	-0.960308	0.337551
Contrast: Window | Protocol * Day * Sex	early - late	Aversive	D13	Female	-27.7187	6.89018	360.703	-4.02294	7.00457e-05				Contrast: Window | Protocol * Day * Sex	early - late	Aversive	D13	Female	-20.7188	7.69178	356.474	-2.69362	0.00740216				Contrast: Window | Protocol * Day * Sex	early - late	Aversive	D13	Female	2.32813	6.94214	356.654	0.335361	0.73755
Contrast: Window | Protocol * Day * Sex	early - late	Mixed	D15	Female	0.390625	3.44509	360.703	0.113386	0.909788				Contrast: Window | Protocol * Day * Sex	early - late	Mixed	D15	Female	-0.472656	3.84589	356.474	-0.122899	0.902256				Contrast: Window | Protocol * Day * Sex	early - late	Mixed	D15	Female	-2.47656	3.47107	356.654	-0.713487	0.476011
Contrast: Window | Protocol * Day * Sex	early - late	Aversive	D15	Female	6.40625	6.89018	360.703	0.929766	0.353114				Contrast: Window | Protocol * Day * Sex	early - late	Aversive	D15	Female	5.0625	7.69178	356.474	0.65817	0.510854				Contrast: Window | Protocol * Day * Sex	early - late	Aversive	D15	Female	4.89063	6.94214	356.654	0.704484	0.481591
Contrast: Window | Protocol * Day * Sex	early - late	Mixed	D01	Male	-17.8068	3.39249	360.703	-5.2489	2.6179e-07				Contrast: Window | Protocol * Day * Sex	early - late	Mixed	D01	Male	-10.2386	3.78717	356.474	-2.7035	0.00718995				Contrast: Window | Protocol * Day * Sex	early - late	Mixed	D01	Male	-23.5795	3.41807	356.654	-6.89849	2.4056e-11
Contrast: Window | Protocol * Day * Sex	early - late	Aversive	D01	Male	-30.4844	6.89018	360.703	-4.42432	1.28297e-05				Contrast: Window | Protocol * Day * Sex	early - late	Aversive	D01	Male	-37.2656	7.69178	356.474	-4.84486	1.89316e-06				Contrast: Window | Protocol * Day * Sex	early - late	Aversive	D01	Male	-41.5156	6.94214	356.654	-5.98024	5.41484e-09
Contrast: Window | Protocol * Day * Sex	early - late	Mixed	D13	Male	-16.4125	3.55807	360.703	-4.61275	5.52801e-06				Contrast: Window | Protocol * Day * Sex	early - late	Mixed	D13	Male	-13.3598	4.01002	357.51	-3.33161	0.000953598				Contrast: Window | Protocol * Day * Sex	early - late	Mixed	D13	Male	-11.4479	3.61856	357.927	-3.16366	0.0016913
Contrast: Window | Protocol * Day * Sex	early - late	Aversive	D13	Male	-8.46875	6.89018	360.703	-1.2291	0.219834				Contrast: Window | Protocol * Day * Sex	early - late	Aversive	D13	Male	-3.78125	7.69178	356.474	-0.491596	0.623308				Contrast: Window | Protocol * Day * Sex	early - late	Aversive	D13	Male	2.40625	6.94214	356.654	0.346615	0.729085
Contrast: Window | Protocol * Day * Sex	early - late	Mixed	D15	Male	-7.98864	3.39249	360.703	-2.3548	0.0190678				Contrast: Window | Protocol * Day * Sex	early - late	Mixed	D15	Male	-3.47348	3.78717	356.474	-0.917171	0.359673				Contrast: Window | Protocol * Day * Sex	early - late	Mixed	D15	Male	-3.09091	3.41807	356.654	-0.904284	0.366455
Contrast: Window | Protocol * Day * Sex	early - late	Aversive	D15	Male	5.73438	6.89018	360.703	0.832254	0.405816				Contrast: Window | Protocol * Day * Sex	early - late	Aversive	D15	Male	2.78125	7.69178	356.474	0.361587	0.717875				Contrast: Window | Protocol * Day * Sex	early - late	Aversive	D15	Male	-3.34375	6.94214	356.654	-0.48166	0.630343
Pre Cue LME Model: Pause ~ Protocol * window * as.factor(day) * Sex + (1 | id)													CS- LME Model: Pause ~ Protocol * window * as.factor(day) * Sex + (1 | id)													CSS LME Model: Pause ~ Protocol * window * as.factor(day) * Sex + (1 | id)
term	estimate	std.error	statistic	conf.low	conf.high	group	level	section					term	estimate	std.error	statistic	conf.low	conf.high	group	level	section					term	estimate	std.error	statistic	conf.low	conf.high	group	level	section
(Intercept)	13.4413	2.56698	5.23621	8.41007	18.4725			Fixed Effects					(Intercept)	32.9752	3.16819	10.4082	26.7657	39.1848			Fixed Effects					(Intercept)	17.935	2.72023	6.59317	12.6034	23.2665			Fixed Effects
ProtocolAversive	7.33262	6.05178	1.21165	-4.52865	19.1939			Fixed Effects					ProtocolAversive	1.10873	7.18246	0.154367	-12.9686	15.1861			Fixed Effects					ProtocolAversive	8.30248	6.24882	1.32865	-3.94499	20.5499			Fixed Effects
windowlate	11.6484	3.44509	3.38117	4.89619	18.4007			Fixed Effects					windowlate	6.49553	3.9567	1.64165	-1.25946	14.2505			Fixed Effects					windowlate	20.2808	3.55898	5.69848	13.3053	27.2563			Fixed Effects
as.factor(day)D13	-1.99341	3.74694	-0.53201	-9.33729	5.35046			Fixed Effects					as.factor(day)D13	-17.1945	4.29	-4.00805	-25.6028	-8.78627			Fixed Effects					as.factor(day)D13	19.5692	3.83698	5.10015	12.0488	27.0895			Fixed Effects
as.factor(day)D15	0.479813	3.44925	0.139106	-6.2806	7.24023			Fixed Effects					as.factor(day)D15	-21.8637	3.96481	-5.51444	-29.6346	-14.0928			Fixed Effects					as.factor(day)D15	24.8611	3.53975	7.02339	17.9233	31.7988			Fixed Effects
SexMale	-0.679906	3.60348	-0.18868	-7.74261	6.38279			Fixed Effects					SexMale	-4.74416	4.35422	-1.08955	-13.2783	3.78995			Fixed Effects					SexMale	-1.55616	3.76258	-0.41359	-8.93068	5.81836			Fixed Effects
ProtocolAversive:windowlate	33.2623	8.13174	4.09042	17.3244	49.2002			Fixed Effects					ProtocolAversive:windowlate	16.5045	9.12529	1.80865	-1.38077	34.3897			Fixed Effects					ProtocolAversive:windowlate	25.0406	8.2307	3.04235	8.90876	41.1725			Fixed Effects
ProtocolAversive:as.factor(day)D13	6.71952	8.07258	0.832389	-9.10244	22.5415			Fixed Effects					ProtocolAversive:as.factor(day)D13	13.595	9.07279	1.49843	-4.1874	31.3773			Fixed Effects					ProtocolAversive:as.factor(day)D13	-0.134729	8.16638	-0.0164981	-16.1405	15.8711			Fixed Effects
ProtocolAversive:as.factor(day)D15	12.0275	7.93878	1.51504	-3.53218	27.5873			Fixed Effects					ProtocolAversive:as.factor(day)D15	25.4048	8.92363	2.84691	7.91477	42.8948			Fixed Effects					ProtocolAversive:as.factor(day)D15	9.90151	8.03101	1.23291	-5.83898	25.642			Fixed Effects
windowlate:as.factor(day)D13	-0.502604	5.26246	-0.0955075	-10.8168	9.81163			Fixed Effects					windowlate:as.factor(day)D13	-2.38615	5.94783	-0.40118	-14.0437	9.27138			Fixed Effects					windowlate:as.factor(day)D13	-16.4318	5.36011	-3.06558	-26.9375	-5.92622			Fixed Effects
windowlate:as.factor(day)D15	-12.0391	4.87209	-2.47103	-21.5882	-2.48994			Fixed Effects					windowlate:as.factor(day)D15	-6.02287	5.51782	-1.09153	-16.8376	4.79186			Fixed Effects					windowlate:as.factor(day)D15	-17.8042	4.97139	-3.58134	-27.548	-8.0605			Fixed Effects
ProtocolAversive:SexMale	-3.32836	8.33078	-0.399525	-19.6564	12.9997			Fixed Effects					ProtocolAversive:SexMale	-6.87104	9.86467	-0.69653	-26.2054	12.4634			Fixed Effects					ProtocolAversive:SexMale	-5.35314	8.58366	-0.623643	-22.1768	11.4705			Fixed Effects
windowlate:SexMale	6.15838	4.83504	1.2737	-3.31812	15.6349			Fixed Effects					windowlate:SexMale	3.74311	5.47706	0.683416	-6.99172	14.4779			Fixed Effects					windowlate:SexMale	3.29875	4.93453	0.668503	-6.37275	12.9702			Fixed Effects
as.factor(day)D13:SexMale	1.90502	5.1155	0.372402	-8.12118	11.9312			Fixed Effects					as.factor(day)D13:SexMale	5.27847	5.81845	0.907195	-6.12549	16.6824			Fixed Effects					as.factor(day)D13:SexMale	0.147418	5.22371	0.028221	-10.0909	10.3857			Fixed Effects
as.factor(day)D15:SexMale	0.584581	4.83801	0.120831	-8.89774	10.0669			Fixed Effects					as.factor(day)D15:SexMale	8.67053	5.48292	1.58137	-2.0758	19.4169			Fixed Effects					as.factor(day)D15:SexMale	-1.15651	4.92068	-0.235031	-10.8009	8.48784			Fixed Effects
ProtocolAversive:windowlate:as.factor(day)D13	-16.6894	11.3765	-1.467	-38.9869	5.60816			Fixed Effects					ProtocolAversive:windowlate:as.factor(day)D13	0.104902	12.734	0.008238	-24.8533	25.0632			Fixed Effects					ProtocolAversive:windowlate:as.factor(day)D13	-31.2177	11.4892	-2.71713	-53.7362	-8.69927			Fixed Effects
ProtocolAversive:windowlate:as.factor(day)D15	-39.2779	11.2013	-3.50656	-61.232	-17.3238			Fixed Effects					ProtocolAversive:windowlate:as.factor(day)D15	-22.0396	12.5389	-1.75769	-46.6155	2.53627			Fixed Effects					ProtocolAversive:windowlate:as.factor(day)D15	-32.4078	11.3131	-2.86463	-54.5811	-10.2346			Fixed Effects
ProtocolAversive:windowlate:SexMale	-20.5847	11.1852	-1.84035	-42.5073	1.33787			Fixed Effects					ProtocolAversive:windowlate:SexMale	10.5225	12.5211	0.840385	-14.0183	35.0634			Fixed Effects					ProtocolAversive:windowlate:SexMale	-7.10455	11.2969	-0.628892	-29.2461	15.037			Fixed Effects
ProtocolAversive:as.factor(day)D13:SexMale	0.775114	11.17	0.0693922	-21.1178	22.668			Fixed Effects					ProtocolAversive:as.factor(day)D13:SexMale	7.89923	12.5272	0.630569	-16.6535	32.452			Fixed Effects					ProtocolAversive:as.factor(day)D13:SexMale	15.59	11.2893	1.38096	-6.53656	37.7166			Fixed Effects
ProtocolAversive:as.factor(day)D15:SexMale	-5.45132	11.0457	-0.493523	-27.1005	16.1979			Fixed Effects					ProtocolAversive:as.factor(day)D15:SexMale	-13.8522	12.3749	-1.11938	-38.1065	10.4021			Fixed Effects					ProtocolAversive:as.factor(day)D15:SexMale	10.6908	11.1523	0.95862	-11.1673	32.5489			Fixed Effects
windowlate:as.factor(day)D13:SexMale	-0.891714	7.20155	-0.123823	-15.0065	13.2231			Fixed Effects					windowlate:as.factor(day)D13:SexMale	5.50734	8.11161	0.678945	-10.3911	21.4058			Fixed Effects					windowlate:as.factor(day)D13:SexMale	4.30019	7.31482	0.587874	-10.0366	18.637			Fixed Effects
windowlate:as.factor(day)D15:SexMale	2.22088	6.83778	0.324796	-11.1809	15.6227			Fixed Effects					windowlate:as.factor(day)D15:SexMale	-0.74228	7.68971	-0.09653	-15.8138	14.3293			Fixed Effects					windowlate:as.factor(day)D15:SexMale	-2.6844	6.93405	-0.387133	-16.2749	10.9061			Fixed Effects
ProtocolAversive:windowlate:as.factor(day)D13:SexMale	-3.93195	15.7652	-0.249406	-34.8312	26.9673			Fixed Effects					ProtocolAversive:windowlate:as.factor(day)D13:SexMale	-36.7105	17.6325	-2.08198	-71.2695	-2.15144			Fixed Effects					ProtocolAversive:windowlate:as.factor(day)D13:SexMale	-0.572514	15.9111	-0.0359819	-31.7578	30.6127			Fixed Effects
ProtocolAversive:windowlate:as.factor(day)D15:SexMale	12.8773	15.6024	0.825342	-17.7028	43.4575			Fixed Effects					ProtocolAversive:windowlate:as.factor(day)D15:SexMale	-11.2421	17.4424	-0.64453	-45.4286	22.9444			Fixed Effects					ProtocolAversive:windowlate:as.factor(day)D15:SexMale	14.7246	15.7397	0.935504	-16.1247	45.5739			Fixed Effects
(Intercept)	-0.275349	3.82573				id	201	Random Effects					(Intercept)	2.19322	5.40628				id	201	Random Effects					(Intercept)	3.34731	4.30966				id	201	Random Effects
(Intercept)	-3.16531	3.5611				id	202	Random Effects					(Intercept)	-3.01453	4.84132				id	202	Random Effects					(Intercept)	-0.884676	3.94619				id	202	Random Effects
(Intercept)	0.781722	3.82573				id	203	Random Effects					(Intercept)	2.97749	5.40628				id	203	Random Effects					(Intercept)	-1.24956	4.30966				id	203	Random Effects
(Intercept)	-4.45083	3.5611				id	204	Random Effects					(Intercept)	-4.463	4.84132				id	204	Random Effects					(Intercept)	-2.44981	3.94619				id	204	Random Effects
(Intercept)	-2.83669	3.5611				id	205	Random Effects					(Intercept)	-4.31964	4.84132				id	205	Random Effects					(Intercept)	-4.34065	3.94619				id	205	Random Effects
(Intercept)	-0.875029	3.5611				id	206	Random Effects					(Intercept)	-6.68423	4.84132				id	206	Random Effects					(Intercept)	2.83879	3.94619				id	206	Random Effects
(Intercept)	1.43723	3.5611				id	207	Random Effects					(Intercept)	-2.80927	4.84132				id	207	Random Effects					(Intercept)	-8.75333	3.94619				id	207	Random Effects
(Intercept)	-1.03816	3.82573				id	208	Random Effects					(Intercept)	5.357	5.40628				id	208	Random Effects					(Intercept)	0.123354	4.30966				id	208	Random Effects
(Intercept)	0.515938	3.5611				id	211	Random Effects					(Intercept)	-5.71339	4.84132				id	211	Random Effects					(Intercept)	-2.44981	3.94619				id	211	Random Effects
(Intercept)	4.07197	3.5611				id	212	Random Effects					(Intercept)	6.07243	4.84132				id	212	Random Effects					(Intercept)	3.07361	3.94619				id	212	Random Effects
(Intercept)	-0.0949951	3.82573				id	213	Random Effects					(Intercept)	5.4367	5.77462				id	213	Random Effects					(Intercept)	-1.38972	4.53359				id	213	Random Effects
(Intercept)	-2.43073	3.5611				id	214	Random Effects					(Intercept)	4.61158	4.84132				id	214	Random Effects					(Intercept)	-1.2078	3.94619				id	214	Random Effects
(Intercept)	0.368749	3.5611				id	215	Random Effects					(Intercept)	-4.5301	4.84132				id	215	Random Effects					(Intercept)	-3.08854	3.94619				id	215	Random Effects
(Intercept)	1.8546	3.5611				id	216	Random Effects					(Intercept)	4.13595	4.84132				id	216	Random Effects					(Intercept)	1.94009	3.94619				id	216	Random Effects
(Intercept)	-0.849986	3.5611				id	217	Random Effects					(Intercept)	-5.68144	4.84132				id	217	Random Effects					(Intercept)	-5.96637	3.94619				id	217	Random Effects
(Intercept)	2.1026	3.82573				id	218	Random Effects					(Intercept)	2.82516	5.40628				id	218	Random Effects					(Intercept)	2.3273	4.30966				id	218	Random Effects
(Intercept)	-3.8665	3.5611				id	221	Random Effects					(Intercept)	-6.04765	4.84132				id	221	Random Effects					(Intercept)	-6.79181	3.94619				id	221	Random Effects
(Intercept)	0.223775	3.5611				id	222	Random Effects					(Intercept)	1.50419	4.84132				id	222	Random Effects					(Intercept)	0.912707	3.94619				id	222	Random Effects
(Intercept)	3.81651	3.82573				id	223	Random Effects					(Intercept)	6.84577	5.77462				id	223	Random Effects					(Intercept)	5.79585	4.30966				id	223	Random Effects
(Intercept)	4.91507	3.5611				id	224	Random Effects					(Intercept)	7.54566	4.84132				id	224	Random Effects					(Intercept)	1.51857	3.94619				id	224	Random Effects
(Intercept)	-1.59291	3.5611				id	225	Random Effects					(Intercept)	-2.0417	4.84132				id	225	Random Effects					(Intercept)	-6.93575	3.94619				id	225	Random Effects
(Intercept)	-1.71813	3.5611				id	226	Random Effects					(Intercept)	-5.84238	4.84132				id	226	Random Effects					(Intercept)	5.99935	3.94619				id	226	Random Effects
(Intercept)	2.23024	3.5611				id	227	Random Effects					(Intercept)	6.48816	4.84132				id	227	Random Effects					(Intercept)	2.31371	3.94619				id	227	Random Effects
(Intercept)	1.34541	3.5611				id	228	Random Effects					(Intercept)	10.6107	4.84132				id	228	Random Effects					(Intercept)	3.30328	3.94619				id	228	Random Effects
(Intercept)	-0.318812	3.5611				id	241	Random Effects					(Intercept)	-6.53047	4.84132				id	241	Random Effects					(Intercept)	-1.2078	3.94619				id	241	Random Effects
(Intercept)	2.21723	3.82573				id	242	Random Effects					(Intercept)	-0.41888	5.40628				id	242	Random Effects					(Intercept)	-1.40612	4.30966				id	242	Random Effects
(Intercept)	3.99956	3.82573				id	243	Random Effects					(Intercept)	6.63631	5.40628				id	243	Random Effects					(Intercept)	0.388349	4.30966				id	243	Random Effects
(Intercept)	-3.8832	3.5611				id	244	Random Effects					(Intercept)	-3.46022	4.84132				id	244	Random Effects					(Intercept)	6.44622	3.94619				id	244	Random Effects
(Intercept)	-0.198881	3.5611				id	245	Random Effects					(Intercept)	4.14833	4.84132				id	245	Random Effects					(Intercept)	-0.493441	3.94619				id	245	Random Effects
(Intercept)	1.29532	3.5611				id	246	Random Effects					(Intercept)	0.694289	4.84132				id	246	Random Effects					(Intercept)	6.40326	3.94619				id	246	Random Effects
(Intercept)	-3.21233	3.5611				id	247	Random Effects					(Intercept)	5.83202	4.84132				id	247	Random Effects					(Intercept)	1.13228	3.94619				id	247	Random Effects
(Intercept)	-1.55952	3.5611				id	248	Random Effects					(Intercept)	2.60082	4.84132				id	248	Random Effects					(Intercept)	0.546618	3.94619				id	248	Random Effects
(Intercept)	-2.22204	3.5611				id	251	Random Effects					(Intercept)	-0.43948	4.84132				id	251	Random Effects					(Intercept)	6.67847	3.94619				id	251	Random Effects
(Intercept)	3.46968	3.82573				id	252	Random Effects					(Intercept)	-0.92834	5.40628				id	252	Random Effects					(Intercept)	-1.00869	4.30966				id	252	Random Effects
(Intercept)	3.26736	3.82573				id	253	Random Effects					(Intercept)	6.21948	5.40628				id	253	Random Effects					(Intercept)	2.36347	4.30966				id	253	Random Effects
(Intercept)	-0.919833	3.5611				id	254	Random Effects					(Intercept)	-0.12998	4.84132				id	254	Random Effects					(Intercept)	-0.783699	3.94619				id	254	Random Effects
(Intercept)	2.63092	3.5611				id	255	Random Effects					(Intercept)	0.545729	4.84132				id	255	Random Effects					(Intercept)	-0.372269	3.94619				id	255	Random Effects
(Intercept)	-0.382526	3.5611				id	256	Random Effects					(Intercept)	-3.23461	5.10048				id	256	Random Effects					(Intercept)	-5.03229	4.11594				id	256	Random Effects
(Intercept)	5.77793	3.5611				id	257	Random Effects					(Intercept)	19.4006	4.84132				id	257	Random Effects					(Intercept)	5.29252	3.94619				id	257	Random Effects
(Intercept)	4.12513	3.5611				id	258	Random Effects					(Intercept)	-4.27012	4.84132				id	258	Random Effects					(Intercept)	3.50523	3.94619				id	258	Random Effects
(Intercept)	-0.777925	3.5611				id	261	Random Effects					(Intercept)	-4.72298	4.84132				id	261	Random Effects					(Intercept)	-1.89444	3.94619				id	261	Random Effects
(Intercept)	-2.27234	3.82573				id	262	Random Effects					(Intercept)	-5.48256	5.40628				id	262	Random Effects					(Intercept)	0.316088	4.30966				id	262	Random Effects
(Intercept)	-2.43612	3.82573				id	263	Random Effects					(Intercept)	-6.42428	5.40628				id	263	Random Effects					(Intercept)	-4.58558	4.30966				id	263	Random Effects
(Intercept)	-1.46242	3.5611				id	264	Random Effects					(Intercept)	-1.64035	4.84132				id	264	Random Effects					(Intercept)	-1.60161	3.94619				id	264	Random Effects
(Intercept)	0.669259	3.5611				id	265	Random Effects					(Intercept)	10.2022	4.84132				id	265	Random Effects					(Intercept)	-0.503539	3.94619				id	265	Random Effects
(Intercept)	-1.42596	3.5611				id	266	Random Effects					(Intercept)	-1.18748	4.84132				id	266	Random Effects					(Intercept)	-0.352074	3.94619				id	266	Random Effects
(Intercept)	6.63772	3.5611				id	267	Random Effects					(Intercept)	5.51013	4.84132				id	267	Random Effects					(Intercept)	-3.31069	3.94619				id	267	Random Effects
(Intercept)	-1.25012	3.82573				id	268	Random Effects					(Intercept)	-1.31223	5.40628				id	268	Random Effects					(Intercept)	7.72275	4.30966				id	268	Random Effects
(Intercept)	-3.59986	3.5611				id	301	Random Effects					(Intercept)	-9.36706	4.84132				id	301	Random Effects					(Intercept)	-1.74563	3.94619				id	301	Random Effects
(Intercept)	5.32362	3.5611				id	302	Random Effects					(Intercept)	12.6571	4.84132				id	302	Random Effects					(Intercept)	9.85658	3.94619				id	302	Random Effects
(Intercept)	-2.88198	3.5611				id	303	Random Effects					(Intercept)	-4.69978	4.84132				id	303	Random Effects					(Intercept)	-1.34173	3.94619				id	303	Random Effects
(Intercept)	-1.02048	3.5611				id	304	Random Effects					(Intercept)	1.73785	4.84132				id	304	Random Effects					(Intercept)	-4.80522	3.94619				id	304	Random Effects
(Intercept)	-0.0605194	3.5611				id	305	Random Effects					(Intercept)	-2.06283	4.84132				id	305	Random Effects					(Intercept)	4.63609	3.94619				id	305	Random Effects
(Intercept)	-0.52798	3.5611				id	306	Random Effects					(Intercept)	-2.64469	4.84132				id	306	Random Effects					(Intercept)	-6.22899	3.94619				id	306	Random Effects
(Intercept)	2.58564	3.5611				id	307	Random Effects					(Intercept)	4.64717	4.84132				id	307	Random Effects					(Intercept)	-3.58341	3.94619				id	307	Random Effects
(Intercept)	0.181558	3.5611				id	308	Random Effects					(Intercept)	-0.26772	4.84132				id	308	Random Effects					(Intercept)	3.21232	3.94619				id	308	Random Effects
(Intercept)	-1.39126	3.5611				id	401	Random Effects					(Intercept)	-3.90397	4.84132				id	401	Random Effects					(Intercept)	-4.53759	3.94619				id	401	Random Effects
(Intercept)	3.48368	3.5611				id	402	Random Effects					(Intercept)	11.6701	4.84132				id	402	Random Effects					(Intercept)	3.2679	3.94619				id	402	Random Effects
(Intercept)	-1.26605	3.5611				id	403	Random Effects					(Intercept)	-2.23266	4.84132				id	403	Random Effects					(Intercept)	-0.528817	3.94619				id	403	Random Effects
(Intercept)	-3.16928	3.5611				id	404	Random Effects					(Intercept)	-1.7127	4.84132				id	404	Random Effects					(Intercept)	-2.85128	3.94619				id	404	Random Effects
(Intercept)	-5.35633	3.5611				id	405	Random Effects					(Intercept)	-7.90273	4.84132				id	405	Random Effects					(Intercept)	1.76335	3.94619				id	405	Random Effects
(Intercept)	4.74415	3.5611				id	406	Random Effects					(Intercept)	4.73731	4.84132				id	406	Random Effects					(Intercept)	3.61122	3.94619				id	406	Random Effects
(Intercept)	1.91722	3.82573				id	407	Random Effects					(Intercept)	-0.78734	5.40628				id	407	Random Effects					(Intercept)	1.66199	4.30966				id	407	Random Effects
(Intercept)	1.03786	3.5611				id	408	Random Effects					(Intercept)	0.131932	4.84132				id	408	Random Effects					(Intercept)	-2.38679	3.94619				id	408	Random Effects
(Intercept)	1.45086	3.5611				id	551	Random Effects					(Intercept)	-1.71463	4.84132				id	551	Random Effects					(Intercept)	1.09446	3.94619				id	551	Random Effects
(Intercept)	4.35579	3.5611				id	552	Random Effects					(Intercept)	6.10957	4.84132				id	552	Random Effects					(Intercept)	-3.15665	3.94619				id	552	Random Effects
(Intercept)	-1.212	3.5611				id	553	Random Effects					(Intercept)	-0.10522	4.84132				id	553	Random Effects					(Intercept)	-4.52993	3.94619				id	553	Random Effects
(Intercept)	-2.50437	3.82573				id	554	Random Effects					(Intercept)	-1.31118	5.40628				id	554	Random Effects					(Intercept)	-0.872021	4.30966				id	554	Random Effects
(Intercept)	1.02514	3.5611				id	555	Random Effects					(Intercept)	-1.75177	4.84132				id	555	Random Effects					(Intercept)	3.44722	3.94619				id	555	Random Effects
(Intercept)	1.55938	3.5611				id	561	Random Effects					(Intercept)	6.07243	4.84132				id	561	Random Effects					(Intercept)	2.6697	3.94619				id	561	Random Effects
(Intercept)	-3.84981	3.5611				id	562	Random Effects					(Intercept)	-1.31498	5.10048				id	562	Random Effects					(Intercept)	-1.06472	4.30966				id	562	Random Effects
(Intercept)	-0.502458	3.5611				id	563	Random Effects					(Intercept)	-3.15072	4.84132				id	563	Random Effects					(Intercept)	-1.01595	3.94619				id	563	Random Effects
(Intercept)	0.975051	3.5611				id	564	Random Effects					(Intercept)	-3.46022	4.84132				id	564	Random Effects					(Intercept)	1.49837	3.94619				id	564	Random Effects
(Intercept)	-3.77161	3.5611				id	651	Random Effects					(Intercept)	-2.23979	4.84132				id	651	Random Effects					(Intercept)	3.46484	3.94619				id	651	Random Effects
(Intercept)	-3.12051	3.5611				id	652	Random Effects					(Intercept)	-6.57281	4.84132				id	652	Random Effects					(Intercept)	-4.17909	3.94619				id	652	Random Effects
(Intercept)	6.42069	3.5611				id	653	Random Effects					(Intercept)	7.77569	4.84132				id	653	Random Effects					(Intercept)	-0.705492	3.94619				id	653	Random Effects
(Intercept)	-0.699731	3.5611				id	654	Random Effects					(Intercept)	-8.33078	4.84132				id	654	Random Effects					(Intercept)	0.576911	3.94619				id	654	Random Effects
(Intercept)	-2.89512	3.5611				id	655	Random Effects					(Intercept)	0.273367	4.84132				id	655	Random Effects					(Intercept)	-0.58432	3.94619				id	655	Random Effects
(Intercept)	-0.749816	3.5611				id	661	Random Effects					(Intercept)	-2.21502	4.84132				id	661	Random Effects					(Intercept)	4.44431	3.94619				id	661	Random Effects
(Intercept)	-2.67809	3.5611				id	662	Random Effects					(Intercept)	-6.56043	4.84132				id	662	Random Effects					(Intercept)	-1.0993	3.94619				id	662	Random Effects
(Intercept)	-4.73158	3.5611				id	663	Random Effects					(Intercept)	-11.4506	4.84132				id	663	Random Effects					(Intercept)	-5.12827	3.94619				id	663	Random Effects
(Intercept)	-1.3091	3.5611				id	664	Random Effects					(Intercept)	-7.11753	4.84132				id	664	Random Effects					(Intercept)	-1.0892	3.94619				id	664	Random Effects
nobs	462							Model Summary					nobs	458							Model Summary					nobs	458							Model Summary
sigma	13.7804							Model Summary					sigma	15.3836							Model Summary					sigma	13.8843							Model Summary
logLik	-1822.21							Model Summary					logLik	-1868.14							Model Summary					logLik	-1814.7							Model Summary
AIC	3696.43							Model Summary					AIC	3788.28							Model Summary					AIC	3681.41							Model Summary
BIC	3803.95							Model Summary					BIC	3895.57							Model Summary					BIC	3788.7							Model Summary
REMLcrit	3644.43							Model Summary					REMLcrit	3736.28							Model Summary					REMLcrit	3629.41							Model Summary
df.residual	436							Model Summary					df.residual	432							Model Summary					df.residual	432							Model Summary

## Sheet: 1i
Port Distance Day contrasts												Port Orientation Day contrasts												% Explore Day contrasts
contrast	day	Protocol	Sex	estimate	SE	df	t.ratio	p.value				contrast	day	Protocol	Sex	estimate	SE	df	t.ratio	p.value				contrast	day	Protocol	Sex	estimate	SE	df	t.ratio	p.value
Contrast: Cue Type | Day * Protocol * Sex												Contrast: Cue Type | Day * Protocol * Sex												Contrast: Cue Type | Day * Protocol * Sex
CSm - CSR	01	Mixed	Female	3.32641	10.4386	2159.01	0.318665	0.750011				CSm - CSR	01	Mixed	Female	-0.10714	0.261231	2159.01	-0.410133	0.681749				CSm - CSR	01	Mixed	Female	-3.20326	2.04441	2159.01	-1.56684	0.117299
CSm - CSR	02	Mixed	Female	4.69918	10.4386	2159.01	0.450175	0.652629				CSm - CSR	02	Mixed	Female	-0.0456244	0.261231	2159.01	-0.174652	0.86137				CSm - CSR	02	Mixed	Female	-1.13138	2.04441	2159.01	-0.553403	0.580045
CSm - CSR	03	Mixed	Female	-6.73876	10.2792	2159.01	-0.655574	0.512168				CSm - CSR	03	Mixed	Female	0.112904	0.257242	2159.01	0.4389	0.660778				CSm - CSR	03	Mixed	Female	1.47109	2.01319	2159.01	0.730723	0.465028
CSm - CSR	04	Mixed	Female	9.09331	10.4386	2159.01	0.871127	0.383782				CSm - CSR	04	Mixed	Female	-0.111797	0.261231	2159.01	-0.427961	0.668722				CSm - CSR	04	Mixed	Female	-0.290278	2.04441	2159.01	-0.141986	0.887104
CSm - CSR	05	Mixed	Female	26.4701	10.9652	2159.01	2.41401	0.0158606				CSm - CSR	05	Mixed	Female	-0.278515	0.27441	2159.01	-1.01496	0.31024				CSm - CSR	05	Mixed	Female	4.35827	2.14755	2159.01	2.02942	0.0425385
CSm - CSR	06	Mixed	Female	22.3822	11.3641	2159.01	1.96956	0.0490164				CSm - CSR	06	Mixed	Female	-0.380066	0.284392	2159.01	-1.33642	0.181554				CSm - CSR	06	Mixed	Female	4.3097	2.22567	2159.01	1.93636	0.0529538
CSm - CSR	07	Mixed	Female	21.6991	10.2792	2159.01	2.11097	0.0348892				CSm - CSR	07	Mixed	Female	-0.631663	0.257242	2159.01	-2.45552	0.0141465				CSm - CSR	07	Mixed	Female	1.0149	2.01319	2159.01	0.504124	0.614226
CSm - CSR	08	Mixed	Female	39.2472	10.8763	2159.27	3.60851	0.00031497				CSm - CSR	08	Mixed	Female	-0.682475	0.272185	2159.31	-2.5074	0.0122353				CSm - CSR	08	Mixed	Female	5.47769	2.13013	2159.33	2.57153	0.0101915
CSm - CSR	09	Mixed	Female	42.3161	10.2792	2159.01	4.11668	3.98829e-05				CSm - CSR	09	Mixed	Female	-0.578437	0.257242	2159.01	-2.24861	0.0246381				CSm - CSR	09	Mixed	Female	7.46285	2.01319	2159.01	3.70697	0.000215033
CSm - CSR	10	Mixed	Female	38.7342	10.9652	2159.01	3.53247	0.000420345				CSm - CSR	10	Mixed	Female	-0.783968	0.27441	2159.01	-2.85692	0.00431871				CSm - CSR	10	Mixed	Female	9.77989	2.14755	2159.01	4.55397	5.55734e-06
CSm - CSR	11	Mixed	Female	48.3475	10.6963	2159.26	4.52	6.51816e-06				CSm - CSR	11	Mixed	Female	-1.09861	0.267681	2159.3	-4.10416	4.20862e-05				CSm - CSR	11	Mixed	Female	9.3577	2.09488	2159.32	4.46694	8.34429e-06
CSm - CSR	12	Mixed	Female	61.5264	11.1593	2159.01	5.51347	3.9389e-08				CSm - CSR	12	Mixed	Female	-1.33626	0.279268	2159.01	-4.78485	1.82686e-06				CSm - CSR	12	Mixed	Female	10.9548	2.18556	2159.01	5.01237	5.8139e-07
CSm - CSR	13	Mixed	Female	57.5488	12.0534	2159.01	4.77449	1.9225e-06				CSm - CSR	13	Mixed	Female	-1.24195	0.301644	2159.01	-4.11726	3.97826e-05				CSm - CSR	13	Mixed	Female	5.80758	2.36068	2159.01	2.46013	0.0139664
CSm - CSR	14	Mixed	Female	71.429	10.2792	2159.01	6.9489	4.85635e-12				CSm - CSR	14	Mixed	Female	-1.71265	0.257242	2159.01	-6.65772	3.51614e-11				CSm - CSR	14	Mixed	Female	11.653	2.01319	2159.01	5.78833	8.14668e-09
CSm - CSR	15	Mixed	Female	88.7743	10.4386	2159.01	8.50446	3.35406e-17				CSm - CSR	15	Mixed	Female	-2.39814	0.261231	2159.01	-9.18014	9.78183e-20				CSm - CSR	15	Mixed	Female	15.3599	2.04441	2159.01	7.51313	8.40353e-14
CSm - CSR	01	Appetitive	Female	-1.58275	20.8771	2159.01	-0.0758125	0.939575				CSm - CSR	01	Appetitive	Female	0.190881	0.522462	2159.01	0.365349	0.714886				CSm - CSR	01	Appetitive	Female	-0.515972	4.08881	2159.01	-0.126191	0.899592
CSm - CSR	02	Appetitive	Female	5.57081	20.8771	2159.01	0.266838	0.789619				CSm - CSR	02	Appetitive	Female	0.194218	0.522462	2159.01	0.371736	0.710126				CSm - CSR	02	Appetitive	Female	-1.25625	4.08881	2159.01	-0.307241	0.75869
CSm - CSR	03	Appetitive	Female	-15.6786	20.8771	2159.01	-0.750994	0.452738				CSm - CSR	03	Appetitive	Female	0.278439	0.522462	2159.01	0.532937	0.594132				CSm - CSR	03	Appetitive	Female	-1.54821	4.08881	2159.01	-0.378646	0.704988
CSm - CSR	04	Appetitive	Female	18.9138	20.8771	2159.01	0.905959	0.365058				CSm - CSR	04	Appetitive	Female	-0.16548	0.522462	2159.01	-0.316731	0.751478				CSm - CSR	04	Appetitive	Female	-0.0590278	4.08881	2159.01	-0.0144364	0.988483
CSm - CSR	05	Appetitive	Female	27.7376	20.8771	2159.01	1.32861	0.184116				CSm - CSR	05	Appetitive	Female	-0.533348	0.522462	2159.01	-1.02084	0.307446				CSm - CSR	05	Appetitive	Female	8.38125	4.08881	2159.01	2.0498	0.0405046
CSm - CSR	06	Appetitive	Female	3.18594	20.8771	2159.01	0.152604	0.878725				CSm - CSR	06	Appetitive	Female	-0.505774	0.522462	2159.01	-0.968058	0.333124				CSm - CSR	06	Appetitive	Female	4.83125	4.08881	2159.01	1.18158	0.237504
CSm - CSR	07	Appetitive	Female	42.6038	22.3186	2159.01	1.9089	0.0564081				CSm - CSR	07	Appetitive	Female	-0.621764	0.558535	2159.01	-1.11321	0.265744				CSm - CSR	07	Appetitive	Female	5.47143	4.37113	2159.01	1.25172	0.210807
CSm - CSR	08	Appetitive	Female	47.2698	20.8771	2159.01	2.26419	0.0236611				CSm - CSR	08	Appetitive	Female	-1.28558	0.522462	2159.01	-2.46062	0.0139474				CSm - CSR	08	Appetitive	Female	6.15417	4.08881	2159.01	1.50512	0.132439
CSm - CSR	09	Appetitive	Female	58.9114	20.8771	2159.01	2.82182	0.00481893				CSm - CSR	09	Appetitive	Female	-1.43761	0.522462	2159.01	-2.75162	0.00597974				CSm - CSR	09	Appetitive	Female	2.35625	4.08881	2159.01	0.576267	0.564495
CSm - CSR	10	Appetitive	Female	110.386	20.8771	2159.01	5.28743	1.36555e-07				CSm - CSR	10	Appetitive	Female	-3.25266	0.522462	2159.01	-6.22564	5.74569e-10				CSm - CSR	10	Appetitive	Female	9.45	4.08881	2159.01	2.31118	0.0209165
CSm - CSR	11	Appetitive	Female	125.069	20.8771	2159.01	5.99074	2.44072e-09				CSm - CSR	11	Appetitive	Female	-3.40733	0.522462	2159.01	-6.52168	8.6323e-11				CSm - CSR	11	Appetitive	Female	10.3562	4.08881	2159.01	2.53282	0.011385
CSm - CSR	12	Appetitive	Female	99.6392	20.8771	2159.01	4.77265	1.93993e-06				CSm - CSR	12	Appetitive	Female	-3.36034	0.522462	2159.01	-6.43173	1.54869e-10				CSm - CSR	12	Appetitive	Female	6.7125	4.08881	2159.01	1.64167	0.100803
CSm - CSR	13	Appetitive	Female	76.4924	21.6323	2160.03	3.53602	0.000414751				CSm - CSR	13	Appetitive	Female	-2.73408	0.541351	2160.2	-5.05048	4.77629e-07				CSm - CSR	13	Appetitive	Female	4.27946	4.23662	2160.25	1.01011	0.312554
CSm - CSR	14	Appetitive	Female	106.993	20.8771	2159.01	5.12489	3.24185e-07				CSm - CSR	14	Appetitive	Female	-4.46973	0.522462	2159.01	-8.55514	2.19544e-17				CSm - CSR	14	Appetitive	Female	14.0563	4.08881	2159.01	3.43773	0.000597726
CSm - CSR	15	Appetitive	Female	113.353	20.8771	2159.01	5.42953	6.28464e-08				CSm - CSR	15	Appetitive	Female	-3.52543	0.522462	2159.01	-6.74773	1.92263e-11				CSm - CSR	15	Appetitive	Female	11.925	4.08881	2159.01	2.91649	0.00357643
CSm - CSR	01	Mixed	Male	6.99338	10.2792	2159.01	0.680343	0.49636				CSm - CSR	01	Mixed	Male	-0.193014	0.257242	2159.01	-0.75032	0.453144				CSm - CSR	01	Mixed	Male	-4.24545	2.01319	2159.01	-2.10882	0.0350753
CSm - CSR	02	Mixed	Male	12.055	10.2792	2159.01	1.17276	0.241022				CSm - CSR	02	Mixed	Male	-0.314176	0.257242	2159.01	-1.22132	0.222097				CSm - CSR	02	Mixed	Male	2.40804	2.01319	2159.01	1.19613	0.231776
CSm - CSR	03	Mixed	Male	14.0243	10.2792	2159.01	1.36434	0.172602				CSm - CSR	03	Mixed	Male	-0.0539923	0.257242	2159.01	-0.209889	0.833774				CSm - CSR	03	Mixed	Male	4.00051	2.01319	2159.01	1.98714	0.0470326
CSm - CSR	04	Mixed	Male	5.75172	10.4386	2159.01	0.551007	0.581686				CSm - CSR	04	Mixed	Male	0.0624924	0.261231	2159.01	0.239223	0.810956				CSm - CSR	04	Mixed	Male	2.31832	2.04441	2159.01	1.13398	0.256929
CSm - CSR	05	Mixed	Male	-1.24389	10.2792	2159.01	-0.121011	0.903694				CSm - CSR	05	Mixed	Male	-0.0308354	0.257242	2159.01	-0.119869	0.904598				CSm - CSR	05	Mixed	Male	-1.30186	2.01319	2159.01	-0.646663	0.517919
CSm - CSR	06	Mixed	Male	10.1895	10.2792	2159.01	0.991271	0.321664				CSm - CSR	06	Mixed	Male	-0.115661	0.257242	2159.01	-0.44962	0.65303				CSm - CSR	06	Mixed	Male	2.87092	2.01319	2159.01	1.42605	0.153998
CSm - CSR	07	Mixed	Male	-8.67448	10.4386	2159.01	-0.831003	0.406064				CSm - CSR	07	Mixed	Male	0.30318	0.261231	2159.01	1.16058	0.245941				CSm - CSR	07	Mixed	Male	1.48819	2.04441	2159.01	0.727934	0.466733
CSm - CSR	08	Mixed	Male	28.7867	10.2792	2159.01	2.80049	0.00514794				CSm - CSR	08	Mixed	Male	-0.400659	0.257242	2159.01	-1.55751	0.119495				CSm - CSR	08	Mixed	Male	1.80135	2.01319	2159.01	0.894771	0.371009
CSm - CSR	09	Mixed	Male	8.44892	10.4386	2159.01	0.809395	0.418377				CSm - CSR	09	Mixed	Male	-0.122154	0.261231	2159.01	-0.46761	0.640111				CSm - CSR	09	Mixed	Male	2.80312	2.04441	2159.01	1.37112	0.17048
CSm - CSR	10	Mixed	Male	14.6358	10.9652	2159.01	1.33475	0.182099				CSm - CSR	10	Mixed	Male	-0.198692	0.27441	2159.01	-0.724069	0.469102				CSm - CSR	10	Mixed	Male	-0.391571	2.14755	2159.01	-0.182334	0.855338
CSm - CSR	11	Mixed	Male	23.1034	10.6056	2159.01	2.17842	0.0294829				CSm - CSR	11	Mixed	Male	-0.469311	0.265411	2159.01	-1.76824	0.0771616				CSm - CSR	11	Mixed	Male	3.381	2.07712	2159.01	1.62774	0.103727
CSm - CSR	12	Mixed	Male	36.45	10.2792	2159.01	3.54601	0.000399446				CSm - CSR	12	Mixed	Male	-0.776391	0.257242	2159.01	-3.01813	0.00257315				CSm - CSR	12	Mixed	Male	6.66067	2.01319	2159.01	3.30851	0.00095335
CSm - CSR	13	Mixed	Male	35.5036	10.7809	2159.01	3.2932	0.00100654				CSm - CSR	13	Mixed	Male	-0.846407	0.269798	2159.01	-3.13719	0.00172878				CSm - CSR	13	Mixed	Male	3.08347	2.11145	2159.01	1.46035	0.144339
CSm - CSR	14	Mixed	Male	46.4333	10.2792	2159.01	4.51722	6.60365e-06				CSm - CSR	14	Mixed	Male	-1.40244	0.257242	2159.01	-5.45184	5.55437e-08				CSm - CSR	14	Mixed	Male	7.51012	2.01319	2159.01	3.73045	0.000196068
CSm - CSR	15	Mixed	Male	41.0574	10.2792	2159.01	3.99423	6.70782e-05				CSm - CSR	15	Mixed	Male	-1.17408	0.257242	2159.01	-4.56411	5.29796e-06				CSm - CSR	15	Mixed	Male	8.03333	2.01319	2159.01	3.99034	6.81784e-05
CSm - CSR	01	Appetitive	Male	3.55846	20.8771	2159.01	0.170448	0.864674				CSm - CSR	01	Appetitive	Male	-0.123178	0.522462	2159.01	-0.235765	0.813637				CSm - CSR	01	Appetitive	Male	-1.15	4.08881	2159.01	-0.281255	0.778542
CSm - CSR	02	Appetitive	Male	34.9439	20.8771	2159.01	1.67379	0.0943172				CSm - CSR	02	Appetitive	Male	-0.529529	0.522462	2159.01	-1.01353	0.310922				CSm - CSR	02	Appetitive	Male	0.7125	4.08881	2159.01	0.174256	0.861681
CSm - CSR	03	Appetitive	Male	-15.3775	20.8771	2159.01	-0.736573	0.461462				CSm - CSR	03	Appetitive	Male	-0.0244825	0.522462	2159.01	-0.0468598	0.962629				CSm - CSR	03	Appetitive	Male	3.03194	4.08881	2159.01	0.741522	0.458458
CSm - CSR	04	Appetitive	Male	-0.277251	20.8771	2159.01	-0.0132801	0.989406				CSm - CSR	04	Appetitive	Male	0.131517	0.522462	2159.01	0.251725	0.801278				CSm - CSR	04	Appetitive	Male	-3.70417	4.08881	2159.01	-0.905927	0.365076
CSm - CSR	05	Appetitive	Male	10.0412	20.8771	2159.01	0.480967	0.630589				CSm - CSR	05	Appetitive	Male	0.0814147	0.522462	2159.01	0.155829	0.876182				CSm - CSR	05	Appetitive	Male	5.77708	4.08881	2159.01	1.4129	0.157829
CSm - CSR	06	Appetitive	Male	-3.41401	20.8771	2159.01	-0.163529	0.870118				CSm - CSR	06	Appetitive	Male	-0.156576	0.522462	2159.01	-0.299689	0.764443				CSm - CSR	06	Appetitive	Male	5.48958	4.08881	2159.01	1.34259	0.179547
CSm - CSR	07	Appetitive	Male	24.0725	20.8771	2159.01	1.15306	0.249014				CSm - CSR	07	Appetitive	Male	-1.18453	0.522462	2159.01	-2.26721	0.023476				CSm - CSR	07	Appetitive	Male	4.14375	4.08881	2159.01	1.01344	0.310966
CSm - CSR	08	Appetitive	Male	66.1962	20.8771	2159.01	3.17075	0.00154177				CSm - CSR	08	Appetitive	Male	-1.03327	0.522462	2159.01	-1.97769	0.0480902				CSm - CSR	08	Appetitive	Male	1.475	4.08881	2159.01	0.36074	0.718329
CSm - CSR	09	Appetitive	Male	25.4208	20.8771	2159.01	1.21764	0.223495				CSm - CSR	09	Appetitive	Male	-0.200437	0.522462	2159.01	-0.383639	0.701284				CSm - CSR	09	Appetitive	Male	4.41319	4.08881	2159.01	1.07933	0.28056
CSm - CSR	10	Appetitive	Male	25.7737	20.8771	2159.01	1.23454	0.217135				CSm - CSR	10	Appetitive	Male	-0.948486	0.522462	2159.01	-1.81542	0.0695986				CSm - CSR	10	Appetitive	Male	8.75486	4.08881	2159.01	2.14117	0.0323717
CSm - CSR	11	Appetitive	Male	40.2813	20.8771	2159.01	1.92945	0.0538065				CSm - CSR	11	Appetitive	Male	-0.904269	0.522462	2159.01	-1.73078	0.0836331				CSm - CSR	11	Appetitive	Male	7.56875	4.08881	2159.01	1.85109	0.0642936
CSm - CSR	12	Appetitive	Male	66.0652	20.8771	2159.01	3.16448	0.00157524				CSm - CSR	12	Appetitive	Male	-1.79876	0.522462	2159.01	-3.44286	0.000586562				CSm - CSR	12	Appetitive	Male	6.66458	4.08881	2159.01	1.62995	0.103257
CSm - CSR	13	Appetitive	Male	46.3402	20.8771	2159.01	2.21967	0.0265449				CSm - CSR	13	Appetitive	Male	-1.8873	0.522462	2159.01	-3.61231	0.000310411				CSm - CSR	13	Appetitive	Male	11.8812	4.08881	2159.01	2.90579	0.00370053
CSm - CSR	14	Appetitive	Male	99.166	20.8771	2159.01	4.74998	2.16804e-06				CSm - CSR	14	Appetitive	Male	-3.13664	0.522462	2159.01	-6.00358	2.25822e-09				CSm - CSR	14	Appetitive	Male	13.025	4.08881	2159.01	3.18552	0.00146556
CSm - CSR	15	Appetitive	Male	54.933	20.8771	2159.01	2.63126	0.00856754				CSm - CSR	15	Appetitive	Male	-1.64013	0.522462	2159.01	-3.13923	0.00171683				CSm - CSR	15	Appetitive	Male	4.825	4.08881	2159.01	1.18005	0.238111
Port Distance LME Model: TP ~ Cue type * Sex * Protocol * Day + (1 | id)												Port Orientation LME Model: TP ~ Cue type * Sex * Protocol * Day + (1 | id)												% Explore LME Model: TP ~ Cue type * Sex * Protocol * Day + (1 | id)
term	estimate	std.error	statistic	conf.low	conf.high	group	level	section				term	estimate	std.error	statistic	conf.low	conf.high	group	level	section				term	estimate	std.error	statistic	conf.low	conf.high	group	level	section
(Intercept)	173.239	8.38862	20.6517	156.798	189.681			Fixed Effects				(Intercept)	2.37279	0.206175	11.5086	1.9687	2.77689			Fixed Effects				(Intercept)	14.7348	1.60597	9.17504	11.5872	17.8825			Fixed Effects
type_subCSR	-3.32641	10.4386	-0.318665	-23.7856	17.1328			Fixed Effects				type_subCSR	0.10714	0.261231	0.410133	-0.404864	0.619143			Fixed Effects				type_subCSR	3.20326	2.04441	1.56684	-0.80371	7.21022			Fixed Effects
ProtocolAppetitive	-39.039	18.8046	-2.07604	-75.8953	-2.18269			Fixed Effects				ProtocolAppetitive	0.701699	0.462013	1.51879	-0.20383	1.60723			Fixed Effects				ProtocolAppetitive	-0.674401	3.59843	-0.187416	-7.72719	6.37838			Fixed Effects
as.factor(day)02	-13.6261	10.4438	-1.30471	-34.0956	6.84328			Fixed Effects				as.factor(day)02	0.0380308	0.261359	0.145512	-0.474223	0.550285			Fixed Effects				as.factor(day)02	0.183883	2.0454	0.0899006	-3.82503	4.1928			Fixed Effects
as.factor(day)03	-2.75167	10.3617	-0.265561	-23.0603	17.5569			Fixed Effects				as.factor(day)03	-0.0625896	0.259307	-0.241373	-0.570822	0.445643			Fixed Effects				as.factor(day)03	5.96468	2.02935	2.93921	1.98723	9.94212			Fixed Effects
as.factor(day)04	0.500152	10.4447	0.0478857	-19.9711	20.9714			Fixed Effects				as.factor(day)04	-0.261069	0.261381	-0.998808	-0.773367	0.251228			Fixed Effects				as.factor(day)04	0.373296	2.04557	0.18249	-3.63595	4.38255			Fixed Effects
as.factor(day)05	-1.45502	10.7194	-0.135737	-22.4647	19.5546			Fixed Effects				as.factor(day)05	-0.209599	0.268252	-0.781349	-0.735363	0.316166			Fixed Effects				as.factor(day)05	6.25093	2.09934	2.97757	2.13631	10.3656			Fixed Effects
as.factor(day)06	12.5631	10.9336	1.14903	-8.86641	33.9925			Fixed Effects				as.factor(day)06	0.0200265	0.273608	0.0731942	-0.516235	0.556288			Fixed Effects				as.factor(day)06	6.47908	2.14124	3.02586	2.28233	10.6758			Fixed Effects
as.factor(day)07	-13.8927	10.3617	-1.34077	-34.2013	6.41588			Fixed Effects				as.factor(day)07	0.0359867	0.259307	0.13878	-0.472246	0.544219			Fixed Effects				as.factor(day)07	1.53564	2.02935	0.756715	-2.44181	5.51308			Fixed Effects
as.factor(day)08	5.15693	10.6238	0.485412	-15.6654	25.9792			Fixed Effects				as.factor(day)08	-0.30142	0.26586	-1.13376	-0.822496	0.219656			Fixed Effects				as.factor(day)08	5.89651	2.08062	2.83402	1.81858	9.97445			Fixed Effects
as.factor(day)09	4.64753	10.3617	0.448528	-15.6611	24.9561			Fixed Effects				as.factor(day)09	-0.0999199	0.259307	-0.385334	-0.608152	0.408312			Fixed Effects				as.factor(day)09	7.79235	2.02935	3.83983	3.8149	11.7698			Fixed Effects
as.factor(day)10	0.766152	10.7218	0.0714573	-20.2482	21.7805			Fixed Effects				as.factor(day)10	-0.118135	0.26831	-0.440292	-0.644012	0.407743			Fixed Effects				as.factor(day)10	8.32756	2.09978	3.96591	4.21206	12.4431			Fixed Effects
as.factor(day)11	8.15726	10.6231	0.76788	-12.6636	28.9781			Fixed Effects				as.factor(day)11	-0.053036	0.265842	-0.199501	-0.574078	0.468006			Fixed Effects				as.factor(day)11	8.53482	2.08048	4.10233	4.45715	12.6125			Fixed Effects
as.factor(day)12	6.35055	10.8242	0.5867	-14.8644	27.5655			Fixed Effects				as.factor(day)12	-0.0379802	0.270871	-0.140215	-0.568877	0.492917			Fixed Effects				as.factor(day)12	8.88824	2.11982	4.19292	4.73347	13.043			Fixed Effects
as.factor(day)13	2.24808	11.3106	0.198759	-19.9202	24.4164			Fixed Effects				as.factor(day)13	-0.257833	0.283034	-0.910961	-0.81257	0.296904			Fixed Effects				as.factor(day)13	2.6586	2.21499	1.20027	-1.68271	6.99991			Fixed Effects
as.factor(day)14	16.239	10.3617	1.5672	-4.06966	36.5476			Fixed Effects				as.factor(day)14	-0.374568	0.259307	-1.4445	-0.882801	0.133664			Fixed Effects				as.factor(day)14	7.94245	2.02935	3.9138	3.96501	11.9199			Fixed Effects
as.factor(day)15	24.998	10.444	2.39354	4.52824	45.4678			Fixed Effects				as.factor(day)15	-0.724059	0.261363	-2.77032	-1.23632	-0.211796			Fixed Effects				as.factor(day)15	9.68844	2.04544	4.73661	5.67946	13.6974			Fixed Effects
SexMale	-15.3719	11.7913	-1.30367	-38.4824	7.73858			Fixed Effects				SexMale	0.0979696	0.289742	0.338128	-0.469913	0.665853			Fixed Effects				SexMale	3.00458	2.25676	1.33137	-1.41859	7.42774			Fixed Effects
type_subCSR:ProtocolAppetitive	4.90915	23.3413	0.21032	-40.839	50.6573			Fixed Effects				type_subCSR:ProtocolAppetitive	-0.298021	0.58413	-0.510196	-1.44289	0.846854			Fixed Effects				type_subCSR:ProtocolAppetitive	-2.68728	4.57143	-0.587842	-11.6471	6.27256			Fixed Effects
type_subCSR:as.factor(day)02	-1.37277	14.7624	-0.0929915	-30.3065	27.5609			Fixed Effects				type_subCSR:as.factor(day)02	-0.0615151	0.369436	-0.166511	-0.785597	0.662567			Fixed Effects				type_subCSR:as.factor(day)02	-2.07188	2.89123	-0.716607	-7.73858	3.59483			Fixed Effects
type_subCSR:as.factor(day)03	10.0652	14.6501	0.687038	-18.6485	38.7788			Fixed Effects				type_subCSR:as.factor(day)03	-0.220043	0.366627	-0.600183	-0.938619	0.498532			Fixed Effects				type_subCSR:as.factor(day)03	-4.67434	2.86924	-1.62912	-10.298	0.94927			Fixed Effects
type_subCSR:as.factor(day)04	-5.76691	14.7624	-0.39065	-34.7006	23.1668			Fixed Effects				type_subCSR:as.factor(day)04	0.00465706	0.369436	0.0126059	-0.719425	0.728739			Fixed Effects				type_subCSR:as.factor(day)04	-2.91298	2.89123	-1.00752	-8.57968	2.75373			Fixed Effects
type_subCSR:as.factor(day)05	-23.1437	15.1393	-1.52872	-52.8163	6.52881			Fixed Effects				type_subCSR:as.factor(day)05	0.171375	0.37887	0.452332	-0.571197	0.913947			Fixed Effects				type_subCSR:as.factor(day)05	-7.56153	2.96506	-2.55021	-13.3729	-1.75012			Fixed Effects
type_subCSR:as.factor(day)06	-19.0558	15.4307	-1.23493	-49.2994	11.1877			Fixed Effects				type_subCSR:as.factor(day)06	0.272927	0.386161	0.706768	-0.483936	1.02979			Fixed Effects				type_subCSR:as.factor(day)06	-7.51296	3.02212	-2.48599	-13.4362	-1.58971			Fixed Effects
type_subCSR:as.factor(day)07	-18.3727	14.6501	-1.2541	-47.0863	10.341			Fixed Effects				type_subCSR:as.factor(day)07	0.524524	0.366627	1.43067	-0.194052	1.2431			Fixed Effects				type_subCSR:as.factor(day)07	-4.21815	2.86924	-1.47013	-9.84176	1.40546			Fixed Effects
type_subCSR:as.factor(day)08	-35.9208	15.0751	-2.3828	-65.4674	-6.37426			Fixed Effects				type_subCSR:as.factor(day)08	0.575336	0.377261	1.52503	-0.164082	1.31475			Fixed Effects				type_subCSR:as.factor(day)08	-8.68094	2.95246	-2.94024	-14.4677	-2.89422			Fixed Effects
type_subCSR:as.factor(day)09	-38.9897	14.6501	-2.66139	-67.7033	-10.276			Fixed Effects				type_subCSR:as.factor(day)09	0.471297	0.366627	1.2855	-0.247278	1.18987			Fixed Effects				type_subCSR:as.factor(day)09	-10.6661	2.86924	-3.7174	-16.2897	-5.0425			Fixed Effects
type_subCSR:as.factor(day)10	-35.4078	15.1393	-2.3388	-65.0803	-5.73526			Fixed Effects				type_subCSR:as.factor(day)10	0.676829	0.37887	1.78644	-0.0657437	1.4194			Fixed Effects				type_subCSR:as.factor(day)10	-12.9831	2.96506	-4.37871	-18.7945	-7.17173			Fixed Effects
type_subCSR:as.factor(day)11	-45.0211	14.9457	-3.0123	-74.3142	-15.728			Fixed Effects				type_subCSR:as.factor(day)11	0.991466	0.374025	2.6508	0.258391	1.72454			Fixed Effects				type_subCSR:as.factor(day)11	-12.561	2.92713	-4.29121	-18.298	-6.82388			Fixed Effects
type_subCSR:as.factor(day)12	-58.1999	15.2805	-3.80878	-88.1492	-28.2507			Fixed Effects				type_subCSR:as.factor(day)12	1.22912	0.382403	3.21419	0.47962	1.97861			Fixed Effects				type_subCSR:as.factor(day)12	-14.1581	2.99271	-4.73087	-20.0237	-8.29251			Fixed Effects
type_subCSR:as.factor(day)13	-54.2224	15.9452	-3.40056	-85.4744	-22.9705			Fixed Effects				type_subCSR:as.factor(day)13	1.13481	0.399037	2.84386	0.352708	1.9169			Fixed Effects				type_subCSR:as.factor(day)13	-9.01084	3.12288	-2.88542	-15.1316	-2.8901			Fixed Effects
type_subCSR:as.factor(day)14	-68.1026	14.6501	-4.64862	-96.8163	-39.389			Fixed Effects				type_subCSR:as.factor(day)14	1.60551	0.366627	4.37913	0.886932	2.32408			Fixed Effects				type_subCSR:as.factor(day)14	-14.8563	2.86924	-5.17777	-20.4799	-9.23267			Fixed Effects
type_subCSR:as.factor(day)15	-85.4479	14.7624	-5.78823	-114.382	-56.5142			Fixed Effects				type_subCSR:as.factor(day)15	2.291	0.369436	6.20133	1.56691	3.01508			Fixed Effects				type_subCSR:as.factor(day)15	-18.5632	2.89123	-6.42051	-24.2299	-12.8964			Fixed Effects
ProtocolAppetitive:as.factor(day)02	45.6167	23.3437	1.95414	-0.136047	91.3694			Fixed Effects				ProtocolAppetitive:as.factor(day)02	-0.28873	0.584187	-0.494243	-1.43372	0.856256			Fixed Effects				ProtocolAppetitive:as.factor(day)02	1.3057	4.57188	0.285594	-7.65502	10.2664			Fixed Effects
ProtocolAppetitive:as.factor(day)03	31.7387	23.3071	1.36176	-13.9423	77.4197			Fixed Effects				ProtocolAppetitive:as.factor(day)03	-0.730076	0.583272	-1.25169	-1.87327	0.413116			Fixed Effects				ProtocolAppetitive:as.factor(day)03	0.501692	4.56472	0.109907	-8.44499	9.44838			Fixed Effects
ProtocolAppetitive:as.factor(day)04	39.7559	23.3441	1.70304	-5.99769	85.5094			Fixed Effects				ProtocolAppetitive:as.factor(day)04	-0.495642	0.584197	-0.848415	-1.64065	0.649364			Fixed Effects				ProtocolAppetitive:as.factor(day)04	8.30379	4.57196	1.81624	-0.65708	17.2647			Fixed Effects
ProtocolAppetitive:as.factor(day)05	61.7332	23.4683	2.6305	15.7362	107.73			Fixed Effects				ProtocolAppetitive:as.factor(day)05	-0.984754	0.587304	-1.67674	-2.13585	0.16634			Fixed Effects				ProtocolAppetitive:as.factor(day)05	6.8324	4.59626	1.48651	-2.17611	15.8409			Fixed Effects
ProtocolAppetitive:as.factor(day)06	18.3245	23.5669	0.777553	-27.8657	64.5147			Fixed Effects				ProtocolAppetitive:as.factor(day)06	-0.864609	0.589769	-1.46601	-2.02054	0.291317			Fixed Effects				ProtocolAppetitive:as.factor(day)06	3.30425	4.61555	0.715896	-5.74206	12.3506			Fixed Effects
ProtocolAppetitive:as.factor(day)07	52.7527	23.9864	2.19928	5.74031	99.7652			Fixed Effects				ProtocolAppetitive:as.factor(day)07	-0.468808	0.600262	-0.781005	-1.6453	0.707684			Fixed Effects				ProtocolAppetitive:as.factor(day)07	3.94673	4.69766	0.840148	-5.26051	13.154			Fixed Effects
ProtocolAppetitive:as.factor(day)08	41.997	23.4248	1.79285	-3.91471	87.9087			Fixed Effects				ProtocolAppetitive:as.factor(day)08	-0.713941	0.586215	-1.21788	-1.8629	0.435019			Fixed Effects				ProtocolAppetitive:as.factor(day)08	4.89932	4.58774	1.06792	-4.09249	13.8911			Fixed Effects
ProtocolAppetitive:as.factor(day)09	47.8807	23.3071	2.05434	2.19971	93.5617			Fixed Effects				ProtocolAppetitive:as.factor(day)09	-0.848889	0.583272	-1.45539	-1.99208	0.294304			Fixed Effects				ProtocolAppetitive:as.factor(day)09	-1.04651	4.56472	-0.229261	-9.9932	7.90017			Fixed Effects
ProtocolAppetitive:as.factor(day)10	70.5521	23.4694	3.00613	24.5529	116.551			Fixed Effects				ProtocolAppetitive:as.factor(day)10	-1.17556	0.58733	-2.00153	-2.3267	-0.024411			Fixed Effects				ProtocolAppetitive:as.factor(day)10	1.37453	4.59647	0.29904	-7.63438	10.3834			Fixed Effects
ProtocolAppetitive:as.factor(day)11	72.429	23.4244	3.09203	26.518	118.34			Fixed Effects				ProtocolAppetitive:as.factor(day)11	-1.3911	0.586207	-2.37305	-2.54004	-0.242154			Fixed Effects				ProtocolAppetitive:as.factor(day)11	2.97976	4.58768	0.649514	-6.01192	11.9715			Fixed Effects
ProtocolAppetitive:as.factor(day)12	56.0674	23.5163	2.38419	9.97625	102.158			Fixed Effects				ProtocolAppetitive:as.factor(day)12	-1.29943	0.588504	-2.20803	-2.45288	-0.145986			Fixed Effects				ProtocolAppetitive:as.factor(day)12	-1.74241	4.60565	-0.378319	-10.7693	7.28451			Fixed Effects
ProtocolAppetitive:as.factor(day)13	58.9499	24.4106	2.41492	11.1059	106.794			Fixed Effects				ProtocolAppetitive:as.factor(day)13	-0.612956	0.610872	-1.00341	-1.81024	0.584332			Fixed Effects				ProtocolAppetitive:as.factor(day)13	7.56045	4.78067	1.58146	-1.8095	16.9304			Fixed Effects
ProtocolAppetitive:as.factor(day)14	36.9636	23.3071	1.58594	-8.71739	82.6446			Fixed Effects				ProtocolAppetitive:as.factor(day)14	-0.717945	0.583272	-1.23089	-1.86114	0.425248			Fixed Effects				ProtocolAppetitive:as.factor(day)14	4.70963	4.56472	1.03175	-4.23706	13.6563			Fixed Effects
ProtocolAppetitive:as.factor(day)15	61.3439	23.3437	2.62785	15.591	107.097			Fixed Effects				ProtocolAppetitive:as.factor(day)15	-0.961864	0.584189	-1.64649	-2.10685	0.183126			Fixed Effects				ProtocolAppetitive:as.factor(day)15	-1.42386	4.57189	-0.311437	-10.3846	7.53689			Fixed Effects
type_subCSR:SexMale	-3.66697	14.6501	-0.250304	-32.3806	25.0467			Fixed Effects				type_subCSR:SexMale	0.0858746	0.366627	0.234229	-0.632701	0.80445			Fixed Effects				type_subCSR:SexMale	1.0422	2.86924	0.363232	-4.58141	6.66581			Fixed Effects
ProtocolAppetitive:SexMale	5.46949	26.5617	0.205917	-46.5904	57.5294			Fixed Effects				ProtocolAppetitive:SexMale	0.265561	0.652568	0.406947	-1.01345	1.54457			Fixed Effects				ProtocolAppetitive:SexMale	-0.439992	5.08252	-0.0865697	-10.4016	9.52157			Fixed Effects
as.factor(day)02:SexMale	6.44448	14.6538	0.439782	-22.2765	35.1654			Fixed Effects				as.factor(day)02:SexMale	0.113691	0.366718	0.310023	-0.605063	0.832445			Fixed Effects				as.factor(day)02:SexMale	2.26886	2.86995	0.790557	-3.35614	7.89386			Fixed Effects
as.factor(day)03:SexMale	-8.84147	14.5954	-0.605769	-37.448	19.7651			Fixed Effects				as.factor(day)03:SexMale	0.390376	0.365259	1.06877	-0.325518	1.10627			Fixed Effects				as.factor(day)03:SexMale	-1.20054	2.85853	-0.419983	-6.80315	4.40208			Fixed Effects
as.factor(day)04:SexMale	-4.47924	14.7125	-0.304451	-33.3152	24.3567			Fixed Effects				as.factor(day)04:SexMale	0.475625	0.368185	1.29181	-0.246004	1.19725			Fixed Effects				as.factor(day)04:SexMale	1.7787	2.88143	0.6173	-3.86879	7.42619			Fixed Effects
as.factor(day)05:SexMale	-1.35132	14.8515	-0.0909886	-30.4597	27.7571			Fixed Effects				as.factor(day)05:SexMale	0.14176	0.371662	0.381423	-0.586684	0.870205			Fixed Effects				as.factor(day)05:SexMale	-4.0248	2.90864	-1.38374	-9.72562	1.67603			Fixed Effects
as.factor(day)06:SexMale	3.21954	15.0068	0.214538	-26.1933	32.6324			Fixed Effects				as.factor(day)06:SexMale	-0.187963	0.375546	-0.500505	-0.92402	0.548094			Fixed Effects				as.factor(day)06:SexMale	-0.408205	2.93902	-0.138891	-6.16858	5.35217			Fixed Effects
as.factor(day)07:SexMale	9.50784	14.6538	0.64883	-19.2131	38.2288			Fixed Effects				as.factor(day)07:SexMale	0.111619	0.366718	0.304373	-0.607135	0.830374			Fixed Effects				as.factor(day)07:SexMale	0.685107	2.86995	0.238717	-4.9399	6.31011			Fixed Effects
as.factor(day)08:SexMale	14.1242	14.7827	0.955457	-14.8493	43.0977			Fixed Effects				as.factor(day)08:SexMale	0.0877886	0.36994	0.237305	-0.63728	0.812857			Fixed Effects				as.factor(day)08:SexMale	-2.06032	2.89515	-0.711644	-7.73471	3.61408			Fixed Effects
as.factor(day)09:SexMale	11.3795	14.6538	0.776556	-17.3414	40.1005			Fixed Effects				as.factor(day)09:SexMale	-0.226169	0.366718	-0.616739	-0.944924	0.492585			Fixed Effects				as.factor(day)09:SexMale	0.529891	2.86995	0.184634	-5.09511	6.15489			Fixed Effects
as.factor(day)10:SexMale	11.4245	15.1044	0.75637	-18.1795	41.0286			Fixed Effects				as.factor(day)10:SexMale	-0.235192	0.377985	-0.622224	-0.976029	0.505646			Fixed Effects				as.factor(day)10:SexMale	-5.09767	2.95811	-1.72329	-10.8955	0.700111			Fixed Effects
as.factor(day)11:SexMale	11.0445	14.9006	0.741208	-18.1602	40.2492			Fixed Effects				as.factor(day)11:SexMale	-0.211528	0.372891	-0.567265	-0.94238	0.519324			Fixed Effects				as.factor(day)11:SexMale	-1.34967	2.91825	-0.462493	-7.06932	4.36999			Fixed Effects
as.factor(day)12:SexMale	17.785	14.9273	1.19144	-11.472	47.042			Fixed Effects				as.factor(day)12:SexMale	-0.326464	0.373557	-0.873933	-1.05862	0.405694			Fixed Effects				as.factor(day)12:SexMale	-2.05011	2.92346	-0.701263	-7.77998	3.67976			Fixed Effects
as.factor(day)13:SexMale	11.404	15.4611	0.737594	-18.8992	41.7073			Fixed Effects				as.factor(day)13:SexMale	-0.141877	0.386907	-0.366696	-0.9002	0.616446			Fixed Effects				as.factor(day)13:SexMale	-0.575664	3.02791	-0.190119	-6.51026	5.35893			Fixed Effects
as.factor(day)14:SexMale	14.321	14.5954	0.981198	-14.2855	42.9276			Fixed Effects				as.factor(day)14:SexMale	-0.0626811	0.365259	-0.171608	-0.778575	0.653213			Fixed Effects				as.factor(day)14:SexMale	-1.14195	2.85853	-0.399488	-6.74457	4.46067			Fixed Effects
as.factor(day)15:SexMale	-3.38314	14.6539	-0.230869	-32.1043	25.338			Fixed Effects				as.factor(day)15:SexMale	0.0895035	0.366721	0.244064	-0.629257	0.808264			Fixed Effects				as.factor(day)15:SexMale	-4.07329	2.86998	-1.41928	-9.69834	1.55176			Fixed Effects
type_subCSR:ProtocolAppetitive:as.factor(day)02	-5.78078	33.0096	-0.175124	-70.4785	58.9169			Fixed Effects				type_subCSR:ProtocolAppetitive:as.factor(day)02	0.0581783	0.826085	0.0704265	-1.56092	1.67727			Fixed Effects				type_subCSR:ProtocolAppetitive:as.factor(day)02	2.81215	6.46498	0.434982	-9.85898	15.4833			Fixed Effects
type_subCSR:ProtocolAppetitive:as.factor(day)03	4.03068	32.9596	0.122292	-60.5689	68.6303			Fixed Effects				type_subCSR:ProtocolAppetitive:as.factor(day)03	0.132485	0.824832	0.160621	-1.48416	1.74913			Fixed Effects				type_subCSR:ProtocolAppetitive:as.factor(day)03	5.70658	6.45518	0.884031	-6.94534	18.3585			Fixed Effects
type_subCSR:ProtocolAppetitive:as.factor(day)04	-14.7297	33.0096	-0.446223	-79.4273	49.968			Fixed Effects				type_subCSR:ProtocolAppetitive:as.factor(day)04	0.351704	0.826085	0.425748	-1.26739	1.9708			Fixed Effects				type_subCSR:ProtocolAppetitive:as.factor(day)04	2.45603	6.46498	0.379898	-10.2151	15.1272			Fixed Effects
type_subCSR:ProtocolAppetitive:as.factor(day)05	-6.17662	33.1799	-0.186155	-71.2081	58.8548			Fixed Effects				type_subCSR:ProtocolAppetitive:as.factor(day)05	0.552854	0.830347	0.665812	-1.0746	2.1803			Fixed Effects				type_subCSR:ProtocolAppetitive:as.factor(day)05	-1.3357	6.49834	-0.205544	-14.0722	11.4008			Fixed Effects
type_subCSR:ProtocolAppetitive:as.factor(day)06	14.2871	33.3139	0.428864	-51.0069	79.5811			Fixed Effects				type_subCSR:ProtocolAppetitive:as.factor(day)06	0.423728	0.833699	0.508251	-1.21029	2.05775			Fixed Effects				type_subCSR:ProtocolAppetitive:as.factor(day)06	2.16573	6.52457	0.331935	-10.6222	14.9537			Fixed Effects
type_subCSR:ProtocolAppetitive:as.factor(day)07	-25.8139	33.891	-0.761674	-92.239	40.6112			Fixed Effects				type_subCSR:ProtocolAppetitive:as.factor(day)07	0.288122	0.848141	0.33971	-1.3742	1.95045			Fixed Effects				type_subCSR:ProtocolAppetitive:as.factor(day)07	-1.76925	6.6376	-0.266549	-14.7787	11.2402			Fixed Effects
type_subCSR:ProtocolAppetitive:as.factor(day)08	-12.9317	33.1506	-0.390089	-77.9058	52.0424			Fixed Effects				type_subCSR:ProtocolAppetitive:as.factor(day)08	0.901127	0.829614	1.0862	-0.724886	2.52714			Fixed Effects				type_subCSR:ProtocolAppetitive:as.factor(day)08	2.0108	6.4926	0.309707	-10.7145	14.7361			Fixed Effects
type_subCSR:ProtocolAppetitive:as.factor(day)09	-21.5045	32.9596	-0.652451	-86.1041	43.0951			Fixed Effects				type_subCSR:ProtocolAppetitive:as.factor(day)09	1.1572	0.824832	1.40295	-0.459443	2.77384			Fixed Effects				type_subCSR:ProtocolAppetitive:as.factor(day)09	7.79389	6.45518	1.20738	-4.85803	20.4458			Fixed Effects
type_subCSR:ProtocolAppetitive:as.factor(day)10	-76.5613	33.1799	-2.30746	-141.593	-11.5298			Fixed Effects				type_subCSR:ProtocolAppetitive:as.factor(day)10	2.76671	0.830347	3.332	1.13926	4.39416			Fixed Effects				type_subCSR:ProtocolAppetitive:as.factor(day)10	3.01717	6.49834	0.464298	-9.71934	15.7537			Fixed Effects
type_subCSR:ProtocolAppetitive:as.factor(day)11	-81.6311	33.092	-2.46679	-146.49	-16.7719			Fixed Effects				type_subCSR:ProtocolAppetitive:as.factor(day)11	2.60675	0.828147	3.14768	0.983607	4.22988			Fixed Effects				type_subCSR:ProtocolAppetitive:as.factor(day)11	1.68874	6.48112	0.260562	-11.014	14.3915			Fixed Effects
type_subCSR:ProtocolAppetitive:as.factor(day)12	-43.022	33.2446	-1.29411	-108.18	22.1362			Fixed Effects				type_subCSR:ProtocolAppetitive:as.factor(day)12	2.3221	0.831965	2.79111	0.691481	3.95272			Fixed Effects				type_subCSR:ProtocolAppetitive:as.factor(day)12	6.92963	6.511	1.0643	-5.83169	19.691			Fixed Effects
type_subCSR:ProtocolAppetitive:as.factor(day)13	-23.8527	34.0302	-0.700927	-90.5506	42.8453			Fixed Effects				type_subCSR:ProtocolAppetitive:as.factor(day)13	1.79016	0.851618	2.10207	0.121019	3.4593			Fixed Effects				type_subCSR:ProtocolAppetitive:as.factor(day)13	4.2154	6.66479	0.632488	-8.84735	17.2782			Fixed Effects
type_subCSR:ProtocolAppetitive:as.factor(day)14	-40.4731	32.9596	-1.22796	-105.073	24.1265			Fixed Effects				type_subCSR:ProtocolAppetitive:as.factor(day)14	3.05511	0.824832	3.70391	1.43847	4.67175			Fixed Effects				type_subCSR:ProtocolAppetitive:as.factor(day)14	0.284063	6.45518	0.0440055	-12.3679	12.936			Fixed Effects
type_subCSR:ProtocolAppetitive:as.factor(day)15	-29.4878	33.0096	-0.89331	-94.1855	35.2098			Fixed Effects				type_subCSR:ProtocolAppetitive:as.factor(day)15	1.42532	0.826085	1.72539	-0.193779	3.04441			Fixed Effects				type_subCSR:ProtocolAppetitive:as.factor(day)15	6.12218	6.46498	0.946975	-6.54896	18.7933			Fixed Effects
type_subCSR:ProtocolAppetitive:SexMale	-1.47424	32.9596	-0.0447287	-66.0738	63.1253			Fixed Effects				type_subCSR:ProtocolAppetitive:SexMale	0.228185	0.824832	0.276644	-1.38846	1.84483			Fixed Effects				type_subCSR:ProtocolAppetitive:SexMale	-0.408172	6.45518	-0.0632316	-13.0601	12.2438			Fixed Effects
type_subCSR:as.factor(day)02:SexMale	-3.68886	20.7184	-0.178048	-44.2961	36.9184			Fixed Effects				type_subCSR:as.factor(day)02:SexMale	0.182677	0.518489	0.352326	-0.833542	1.1989			Fixed Effects				type_subCSR:as.factor(day)02:SexMale	-4.58162	4.05772	-1.12911	-12.5346	3.37136			Fixed Effects
type_subCSR:as.factor(day)03:SexMale	-17.0961	20.6385	-0.82836	-57.5469	23.3546			Fixed Effects				type_subCSR:as.factor(day)03:SexMale	0.0810215	0.516491	0.156869	-0.931282	1.09332			Fixed Effects				type_subCSR:as.factor(day)03:SexMale	-3.57162	4.04208	-0.883608	-11.494	4.35072			Fixed Effects
type_subCSR:as.factor(day)04:SexMale	7.00856	20.7979	0.336984	-33.7545	47.7717			Fixed Effects				type_subCSR:as.factor(day)04:SexMale	-0.260164	0.520479	-0.499854	-1.28028	0.759957			Fixed Effects				type_subCSR:as.factor(day)04:SexMale	-3.65079	4.0733	-0.896275	-11.6343	4.33272			Fixed Effects
type_subCSR:as.factor(day)05:SexMale	31.381	20.9886	1.49514	-9.75596	72.5179			Fixed Effects				type_subCSR:as.factor(day)05:SexMale	-0.333554	0.525252	-0.635035	-1.36303	0.695922			Fixed Effects				type_subCSR:as.factor(day)05:SexMale	4.61793	4.11065	1.12341	-3.4388	12.6747			Fixed Effects
type_subCSR:as.factor(day)06:SexMale	15.8597	21.1997	0.74811	-25.691	57.4104			Fixed Effects				type_subCSR:as.factor(day)06:SexMale	-0.350279	0.530536	-0.660237	-1.39011	0.689551			Fixed Effects				type_subCSR:as.factor(day)06:SexMale	0.396583	4.152	0.0955162	-7.74119	8.53435			Fixed Effects
type_subCSR:as.factor(day)07:SexMale	34.0405	20.7184	1.64301	-6.56669	74.6478			Fixed Effects				type_subCSR:as.factor(day)07:SexMale	-1.02072	0.518489	-1.96864	-2.03694	-0.00449802			Fixed Effects				type_subCSR:as.factor(day)07:SexMale	-1.51549	4.05772	-0.373484	-9.46848	6.43749			Fixed Effects
type_subCSR:as.factor(day)08:SexMale	14.1275	20.9423	0.674589	-26.9187	55.1736			Fixed Effects				type_subCSR:as.factor(day)08:SexMale	-0.367691	0.524093	-0.701576	-1.39489	0.659512			Fixed Effects				type_subCSR:as.factor(day)08:SexMale	2.63414	4.10158	0.642226	-5.4048	10.6731			Fixed Effects
type_subCSR:as.factor(day)09:SexMale	37.5341	20.7184	1.81164	-3.0731	78.1414			Fixed Effects				type_subCSR:as.factor(day)09:SexMale	-0.542157	0.518489	-1.04565	-1.55838	0.474062			Fixed Effects				type_subCSR:as.factor(day)09:SexMale	3.61753	4.05772	0.891518	-4.33546	11.5705			Fixed Effects
type_subCSR:as.factor(day)10:SexMale	27.7654	21.333	1.30152	-14.0465	69.5772			Fixed Effects				type_subCSR:as.factor(day)10:SexMale	-0.67115	0.53387	-1.25714	-1.71752	0.375216			Fixed Effects				type_subCSR:as.factor(day)10:SexMale	9.12926	4.1781	2.18503	0.940336	17.3182			Fixed Effects
type_subCSR:as.factor(day)11:SexMale	28.9111	21.0123	1.37591	-12.2722	70.0943			Fixed Effects				type_subCSR:as.factor(day)11:SexMale	-0.715169	0.525843	-1.36004	-1.7458	0.315465			Fixed Effects				type_subCSR:as.factor(day)11:SexMale	4.9345	4.11527	1.19907	-3.13129	13.0003			Fixed Effects
type_subCSR:as.factor(day)12:SexMale	28.7433	21.0907	1.36284	-12.5937	70.0802			Fixed Effects				type_subCSR:as.factor(day)12:SexMale	-0.645739	0.527806	-1.22344	-1.68022	0.388743			Fixed Effects				type_subCSR:as.factor(day)12:SexMale	3.25198	4.13064	0.787283	-4.84392	11.3479			Fixed Effects
type_subCSR:as.factor(day)13:SexMale	25.7122	21.8206	1.17835	-17.0553	68.4797			Fixed Effects				type_subCSR:as.factor(day)13:SexMale	-0.481413	0.546073	-0.881592	-1.5517	0.588869			Fixed Effects				type_subCSR:as.factor(day)13:SexMale	1.68192	4.27359	0.39356	-6.69417	10.058			Fixed Effects
type_subCSR:as.factor(day)14:SexMale	28.6627	20.6385	1.3888	-11.7881	69.1134			Fixed Effects				type_subCSR:as.factor(day)14:SexMale	-0.396078	0.516491	-0.766863	-1.40838	0.616226			Fixed Effects				type_subCSR:as.factor(day)14:SexMale	3.10071	4.04208	0.767107	-4.82163	11.0231			Fixed Effects
type_subCSR:as.factor(day)15:SexMale	51.3839	20.7184	2.48011	10.7766	91.9911			Fixed Effects				type_subCSR:as.factor(day)15:SexMale	-1.30993	0.518489	-2.52643	-2.32615	-0.293709			Fixed Effects				type_subCSR:as.factor(day)15:SexMale	6.28436	4.05772	1.54874	-1.66862	14.2373			Fixed Effects
ProtocolAppetitive:as.factor(day)02:SexMale	18.3085	32.9612	0.555457	-46.2943	82.9114			Fixed Effects				ProtocolAppetitive:as.factor(day)02:SexMale	-1.21821	0.824873	-1.47684	-2.83493	0.398514			Fixed Effects				ProtocolAppetitive:as.factor(day)02:SexMale	2.18531	6.4555	0.338519	-10.4672	14.8378			Fixed Effects
ProtocolAppetitive:as.factor(day)03:SexMale	14.0642	32.9353	0.427025	-50.4878	78.6162			Fixed Effects				ProtocolAppetitive:as.factor(day)03:SexMale	-0.82713	0.824225	-1.00352	-2.44258	0.788322			Fixed Effects				ProtocolAppetitive:as.factor(day)03:SexMale	7.69736	6.45043	1.19331	-4.94524	20.34			Fixed Effects
ProtocolAppetitive:as.factor(day)04:SexMale	6.01393	32.9874	0.18231	-58.6401	70.6679			Fixed Effects				ProtocolAppetitive:as.factor(day)04:SexMale	-0.859119	0.825526	-1.04069	-2.47712	0.758882			Fixed Effects				ProtocolAppetitive:as.factor(day)04:SexMale	-3.03634	6.46061	-0.469978	-15.6989	9.62621			Fixed Effects
ProtocolAppetitive:as.factor(day)05:SexMale	-3.27702	33.0496	-0.0991548	-68.053	61.499			Fixed Effects				ProtocolAppetitive:as.factor(day)05:SexMale	-0.132688	0.827083	-0.160429	-1.75374	1.48836			Fixed Effects				ProtocolAppetitive:as.factor(day)05:SexMale	5.54355	6.47279	0.856439	-7.14288	18.23			Fixed Effects
ProtocolAppetitive:as.factor(day)06:SexMale	24.4654	33.1197	0.738696	-40.448	89.3788			Fixed Effects				ProtocolAppetitive:as.factor(day)06:SexMale	-0.5888	0.828835	-0.710395	-2.21329	1.03569			Fixed Effects				ProtocolAppetitive:as.factor(day)06:SexMale	1.23112	6.4865	0.189798	-11.4822	13.9444			Fixed Effects
ProtocolAppetitive:as.factor(day)07:SexMale	19.0419	33.445	0.569348	-46.5092	84.5929			Fixed Effects				ProtocolAppetitive:as.factor(day)07:SexMale	-1.33561	0.836973	-1.59577	-2.97605	0.304824			Fixed Effects				ProtocolAppetitive:as.factor(day)07:SexMale	0.0450267	6.55017	0.00687412	-12.7931	12.8831			Fixed Effects
ProtocolAppetitive:as.factor(day)08:SexMale	47.3964	33.0187	1.43544	-17.319	112.112			Fixed Effects				ProtocolAppetitive:as.factor(day)08:SexMale	-0.740702	0.82631	-0.896398	-2.36024	0.878835			Fixed Effects				ProtocolAppetitive:as.factor(day)08:SexMale	4.35823	6.46674	0.673946	-8.31634	17.0328			Fixed Effects
ProtocolAppetitive:as.factor(day)09:SexMale	13.972	32.9612	0.423891	-50.6309	78.5748			Fixed Effects				ProtocolAppetitive:as.factor(day)09:SexMale	-0.499099	0.824873	-0.605062	-2.11582	1.11762			Fixed Effects				ProtocolAppetitive:as.factor(day)09:SexMale	2.37428	6.4555	0.367791	-10.2783	15.0268			Fixed Effects
ProtocolAppetitive:as.factor(day)10:SexMale	-15.6432	33.164	-0.471693	-80.6435	49.357			Fixed Effects				ProtocolAppetitive:as.factor(day)10:SexMale	0.0169032	0.829943	0.0203667	-1.60976	1.64356			Fixed Effects				ProtocolAppetitive:as.factor(day)10:SexMale	11.0581	6.49517	1.70251	-1.67221	23.7884			Fixed Effects
ProtocolAppetitive:as.factor(day)11:SexMale	-21.9846	33.0717	-0.664755	-86.8039	42.8347			Fixed Effects				ProtocolAppetitive:as.factor(day)11:SexMale	0.137757	0.827635	0.166447	-1.48438	1.75989			Fixed Effects				ProtocolAppetitive:as.factor(day)11:SexMale	4.87258	6.47711	0.752277	-7.82232	17.5675			Fixed Effects
ProtocolAppetitive:as.factor(day)12:SexMale	-7.28198	33.0837	-0.220108	-72.1249	57.5609			Fixed Effects				ProtocolAppetitive:as.factor(day)12:SexMale	0.100496	0.827936	0.121381	-1.52223	1.72322			Fixed Effects				ProtocolAppetitive:as.factor(day)12:SexMale	3.83136	6.47946	0.591309	-8.86815	16.5309			Fixed Effects
ProtocolAppetitive:as.factor(day)13:SexMale	-11.1019	33.8061	-0.328398	-77.3606	55.1568			Fixed Effects				ProtocolAppetitive:as.factor(day)13:SexMale	-0.412835	0.846002	-0.487983	-2.07097	1.2453			Fixed Effects				ProtocolAppetitive:as.factor(day)13:SexMale	3.18162	6.62082	0.480548	-9.79495	16.1582			Fixed Effects
ProtocolAppetitive:as.factor(day)14:SexMale	16.7093	32.9353	0.507337	-47.8427	81.2613			Fixed Effects				ProtocolAppetitive:as.factor(day)14:SexMale	-0.57759	0.824225	-0.700768	-2.19304	1.03786			Fixed Effects				ProtocolAppetitive:as.factor(day)14:SexMale	-2.41638	6.45043	-0.374608	-15.059	10.2262			Fixed Effects
ProtocolAppetitive:as.factor(day)15:SexMale	-10.9108	32.9613	-0.331018	-75.5137	53.6921			Fixed Effects				ProtocolAppetitive:as.factor(day)15:SexMale	-0.0951983	0.824874	-0.115409	-1.71192	1.52153			Fixed Effects				ProtocolAppetitive:as.factor(day)15:SexMale	4.72121	6.45551	0.731346	-7.93135	17.3738			Fixed Effects
type_subCSR:ProtocolAppetitive:as.factor(day)02:SexMale	-20.543	46.6119	-0.440724	-111.901	70.8146			Fixed Effects				type_subCSR:ProtocolAppetitive:as.factor(day)02:SexMale	0.22701	1.16649	0.19461	-2.05927	2.51329			Fixed Effects				type_subCSR:ProtocolAppetitive:as.factor(day)02:SexMale	1.97885	9.129	0.216765	-15.9137	19.8714			Fixed Effects
type_subCSR:ProtocolAppetitive:as.factor(day)03:SexMale	21.9363	46.5764	0.470973	-69.3519	113.224			Fixed Effects				type_subCSR:ProtocolAppetitive:as.factor(day)03:SexMale	-0.0921594	1.1656	-0.0790659	-2.3767	2.19238			Fixed Effects				type_subCSR:ProtocolAppetitive:as.factor(day)03:SexMale	-1.64257	9.12206	-0.180065	-19.5215	16.2364			Fixed Effects
type_subCSR:ProtocolAppetitive:as.factor(day)04:SexMale	17.3237	46.6473	0.371377	-74.1033	108.751			Fixed Effects				type_subCSR:ProtocolAppetitive:as.factor(day)04:SexMale	-0.350893	1.16738	-0.300583	-2.63891	1.93712			Fixed Effects				type_subCSR:ProtocolAppetitive:as.factor(day)04:SexMale	6.6619	9.13594	0.729198	-11.2442	24.568			Fixed Effects
type_subCSR:ProtocolAppetitive:as.factor(day)05:SexMale	-8.54339	46.7326	-0.182814	-100.138	83.0509			Fixed Effects				type_subCSR:ProtocolAppetitive:as.factor(day)05:SexMale	-0.595269	1.16951	-0.508989	-2.88747	1.69693			Fixed Effects				type_subCSR:ProtocolAppetitive:as.factor(day)05:SexMale	-2.64779	9.15266	-0.289292	-20.5867	15.2911			Fixed Effects
type_subCSR:ProtocolAppetitive:as.factor(day)06:SexMale	-4.11857	46.8278	-0.0879514	-95.8994	87.6623			Fixed Effects				type_subCSR:ProtocolAppetitive:as.factor(day)06:SexMale	-0.312977	1.17189	-0.26707	-2.60985	1.98389			Fixed Effects				type_subCSR:ProtocolAppetitive:as.factor(day)06:SexMale	-1.68894	9.1713	-0.184155	-19.6644	16.2865			Fixed Effects
type_subCSR:ProtocolAppetitive:as.factor(day)07:SexMale	-10.368	47.2751	-0.219313	-103.025	82.2894			Fixed Effects				type_subCSR:ProtocolAppetitive:as.factor(day)07:SexMale	1.26942	1.18309	1.07298	-1.04938	3.58823			Fixed Effects				type_subCSR:ProtocolAppetitive:as.factor(day)07:SexMale	2.20915	9.25889	0.238597	-15.9379	20.3562			Fixed Effects
type_subCSR:ProtocolAppetitive:as.factor(day)08:SexMale	-27.9126	46.7119	-0.597549	-119.466	63.6409			Fixed Effects				type_subCSR:ProtocolAppetitive:as.factor(day)08:SexMale	-0.19868	1.16899	-0.169959	-2.48986	2.0925			Fixed Effects				type_subCSR:ProtocolAppetitive:as.factor(day)08:SexMale	1.411	9.14858	0.154232	-16.5199	19.3419			Fixed Effects
type_subCSR:ProtocolAppetitive:as.factor(day)09:SexMale	1.09775	46.6119	0.0235508	-90.2598	92.4553			Fixed Effects				type_subCSR:ProtocolAppetitive:as.factor(day)09:SexMale	-1.00908	1.16649	-0.865058	-3.29536	1.2772			Fixed Effects				type_subCSR:ProtocolAppetitive:as.factor(day)09:SexMale	-6.3085	9.129	-0.691039	-24.201	11.584			Fixed Effects
type_subCSR:ProtocolAppetitive:as.factor(day)10:SexMale	61.9885	46.8883	1.32205	-29.9109	153.888			Fixed Effects				type_subCSR:ProtocolAppetitive:as.factor(day)10:SexMale	-1.94708	1.17341	-1.65934	-4.24692	0.352751			Fixed Effects				type_subCSR:ProtocolAppetitive:as.factor(day)10:SexMale	-9.06815	9.18314	-0.987477	-27.0668	8.93048			Fixed Effects
type_subCSR:ProtocolAppetitive:as.factor(day)11:SexMale	61.0183	46.7432	1.30539	-30.5968	152.633			Fixed Effects				type_subCSR:ProtocolAppetitive:as.factor(day)11:SexMale	-2.10195	1.16978	-1.79688	-4.39467	0.190769			Fixed Effects				type_subCSR:ProtocolAppetitive:as.factor(day)11:SexMale	-2.78103	9.15473	-0.30378	-20.724	15.1619			Fixed Effects
type_subCSR:ProtocolAppetitive:as.factor(day)12:SexMale	9.97191	46.7786	0.213173	-81.7124	101.656			Fixed Effects				type_subCSR:ProtocolAppetitive:as.factor(day)12:SexMale	-1.22989	1.17066	-1.0506	-3.52434	1.06456			Fixed Effects				type_subCSR:ProtocolAppetitive:as.factor(day)12:SexMale	-3.83809	9.16165	-0.41893	-21.7946	14.1184			Fixed Effects
type_subCSR:ProtocolAppetitive:as.factor(day)13:SexMale	9.58112	47.4516	0.201914	-83.4222	102.584			Fixed Effects				type_subCSR:ProtocolAppetitive:as.factor(day)13:SexMale	-0.679435	1.1875	-0.572157	-3.00689	1.64802			Fixed Effects				type_subCSR:ProtocolAppetitive:as.factor(day)13:SexMale	-9.91773	9.29341	-1.06718	-28.1325	8.29701			Fixed Effects
type_subCSR:ProtocolAppetitive:as.factor(day)14:SexMale	-15.6945	46.5764	-0.336962	-106.983	75.5937			Fixed Effects				type_subCSR:ProtocolAppetitive:as.factor(day)14:SexMale	-1.25108	1.1656	-1.07333	-3.53561	1.03346			Fixed Effects				type_subCSR:ProtocolAppetitive:as.factor(day)14:SexMale	-2.70349	9.12206	-0.296368	-20.5824	15.1754			Fixed Effects
type_subCSR:ProtocolAppetitive:as.factor(day)15:SexMale	12.1773	46.6119	0.261249	-79.1803	103.535			Fixed Effects				type_subCSR:ProtocolAppetitive:as.factor(day)15:SexMale	-0.889437	1.16649	-0.762491	-3.17571	1.39684			Fixed Effects				type_subCSR:ProtocolAppetitive:as.factor(day)15:SexMale	0.181609	9.129	0.0198936	-17.7109	18.0741			Fixed Effects
(Intercept)	-1.44345	7.70898				id	201	Random Effects				(Intercept)	0.129879	0.190903				id	201	Random Effects				(Intercept)	-1.70569	1.48911				id	201	Random Effects
(Intercept)	-23.7573	7.45891				id	202	Random Effects				(Intercept)	0.555529	0.184833				id	202	Random Effects				(Intercept)	1.14668	1.44206				id	202	Random Effects
(Intercept)	-12.0144	7.70898				id	203	Random Effects				(Intercept)	-0.0329115	0.190903				id	203	Random Effects				(Intercept)	-2.48966	1.48911				id	203	Random Effects
(Intercept)	-2.89038	7.34267				id	204	Random Effects				(Intercept)	0.215327	0.182008				id	204	Random Effects				(Intercept)	5.25329	1.42014				id	204	Random Effects
(Intercept)	-0.192861	7.23171				id	205	Random Effects				(Intercept)	-0.151491	0.179308				id	205	Random Effects				(Intercept)	2.52487	1.3992				id	205	Random Effects
(Intercept)	-40.4441	7.23171				id	206	Random Effects				(Intercept)	1.16647	0.179308				id	206	Random Effects				(Intercept)	-4.75244	1.3992				id	206	Random Effects
(Intercept)	-12.2809	7.23171				id	207	Random Effects				(Intercept)	0.132723	0.179308				id	207	Random Effects				(Intercept)	-1.27511	1.3992				id	207	Random Effects
(Intercept)	-36.4414	7.70898				id	208	Random Effects				(Intercept)	1.16744	0.190903				id	208	Random Effects				(Intercept)	-4.49783	1.48911				id	208	Random Effects
(Intercept)	25.4054	7.45891				id	211	Random Effects				(Intercept)	-0.22355	0.184833				id	211	Random Effects				(Intercept)	-2.40303	1.44206				id	211	Random Effects
(Intercept)	28.1834	7.70898				id	212	Random Effects				(Intercept)	-0.527715	0.190903				id	212	Random Effects				(Intercept)	-0.407373	1.48911				id	212	Random Effects
(Intercept)	-12.3384	8.64337				id	213	Random Effects				(Intercept)	0.472018	0.213472				id	213	Random Effects				(Intercept)	-1.24036	1.66378				id	213	Random Effects
(Intercept)	19.1961	7.23171				id	214	Random Effects				(Intercept)	-0.202558	0.179308				id	214	Random Effects				(Intercept)	-1.19283	1.3992				id	214	Random Effects
(Intercept)	-22.6067	7.23171				id	215	Random Effects				(Intercept)	0.424127	0.179308				id	215	Random Effects				(Intercept)	-2.96431	1.3992				id	215	Random Effects
(Intercept)	-17.5587	7.45891				id	216	Random Effects				(Intercept)	0.037149	0.184833				id	216	Random Effects				(Intercept)	-1.77544	1.44206				id	216	Random Effects
(Intercept)	-3.57126	7.23171				id	217	Random Effects				(Intercept)	-0.1348	0.179308				id	217	Random Effects				(Intercept)	4.02687	1.3992				id	217	Random Effects
(Intercept)	-1.97332	7.45891				id	218	Random Effects				(Intercept)	-0.0435196	0.184833				id	218	Random Effects				(Intercept)	1.9406	1.44206				id	218	Random Effects
(Intercept)	-5.86262	7.23171				id	221	Random Effects				(Intercept)	0.235487	0.179308				id	221	Random Effects				(Intercept)	-1.88569	1.3992				id	221	Random Effects
(Intercept)	-5.33954	7.45891				id	222	Random Effects				(Intercept)	-0.158291	0.184833				id	222	Random Effects				(Intercept)	-0.881351	1.44206				id	222	Random Effects
(Intercept)	-44.8313	7.986				id	223	Random Effects				(Intercept)	0.56299	0.197613				id	223	Random Effects				(Intercept)	-3.42747	1.54108				id	223	Random Effects
(Intercept)	-3.54166	7.23171				id	224	Random Effects				(Intercept)	-0.177874	0.179308				id	224	Random Effects				(Intercept)	-5.41255	1.3992				id	224	Random Effects
(Intercept)	25.0939	7.23171				id	225	Random Effects				(Intercept)	-0.649538	0.179308				id	225	Random Effects				(Intercept)	0.441906	1.3992				id	225	Random Effects
(Intercept)	-24.1597	7.45891				id	226	Random Effects				(Intercept)	0.285243	0.184833				id	226	Random Effects				(Intercept)	1.7931	1.44206				id	226	Random Effects
(Intercept)	39.3834	7.23171				id	227	Random Effects				(Intercept)	-0.12099	0.179308				id	227	Random Effects				(Intercept)	-4.04637	1.3992				id	227	Random Effects
(Intercept)	-1.13304	7.23171				id	228	Random Effects				(Intercept)	-0.0573192	0.179308				id	228	Random Effects				(Intercept)	-0.745871	1.3992				id	228	Random Effects
(Intercept)	-35.9026	7.45891				id	241	Random Effects				(Intercept)	0.174691	0.184833				id	241	Random Effects				(Intercept)	-4.50162	1.44206				id	241	Random Effects
(Intercept)	-3.92384	7.45891				id	242	Random Effects				(Intercept)	-0.138431	0.184833				id	242	Random Effects				(Intercept)	-1.03911	1.44206				id	242	Random Effects
(Intercept)	-42.3886	7.986				id	243	Random Effects				(Intercept)	1.43977	0.197613				id	243	Random Effects				(Intercept)	-6.0881	1.54108				id	243	Random Effects
(Intercept)	9.09141	7.23171				id	244	Random Effects				(Intercept)	0.33633	0.179308				id	244	Random Effects				(Intercept)	-0.248696	1.3992				id	244	Random Effects
(Intercept)	21.579	7.23171				id	245	Random Effects				(Intercept)	-0.359982	0.179308				id	245	Random Effects				(Intercept)	-0.784743	1.3992				id	245	Random Effects
(Intercept)	-4.49039	7.45891				id	246	Random Effects				(Intercept)	0.211932	0.184833				id	246	Random Effects				(Intercept)	3.4692	1.44206				id	246	Random Effects
(Intercept)	-0.786924	7.23171				id	247	Random Effects				(Intercept)	-0.220925	0.179308				id	247	Random Effects				(Intercept)	-1.18143	1.3992				id	247	Random Effects
(Intercept)	28.4771	7.23171				id	248	Random Effects				(Intercept)	-0.439869	0.179308				id	248	Random Effects				(Intercept)	4.91164	1.3992				id	248	Random Effects
(Intercept)	38.1097	7.45891				id	251	Random Effects				(Intercept)	-0.631673	0.184833				id	251	Random Effects				(Intercept)	-0.14714	1.44206				id	251	Random Effects
(Intercept)	-15.3804	7.45891				id	252	Random Effects				(Intercept)	0.320963	0.184833				id	252	Random Effects				(Intercept)	-3.565	1.44206				id	252	Random Effects
(Intercept)	30.5865	8.29521				id	253	Random Effects				(Intercept)	-0.345487	0.205084				id	253	Random Effects				(Intercept)	7.35357	1.59891				id	253	Random Effects
(Intercept)	-1.25946	7.23171				id	254	Random Effects				(Intercept)	-0.115457	0.179308				id	254	Random Effects				(Intercept)	-0.190876	1.3992				id	254	Random Effects
(Intercept)	4.2174	7.23171				id	255	Random Effects				(Intercept)	-0.464025	0.179308				id	255	Random Effects				(Intercept)	0.881041	1.3992				id	255	Random Effects
(Intercept)	10.9004	7.23171				id	256	Random Effects				(Intercept)	-0.0703589	0.179308				id	256	Random Effects				(Intercept)	7.5149	1.3992				id	256	Random Effects
(Intercept)	-36.3327	7.23171				id	257	Random Effects				(Intercept)	0.149576	0.179308				id	257	Random Effects				(Intercept)	-1.92064	1.3992				id	257	Random Effects
(Intercept)	6.81621	7.23171				id	258	Random Effects				(Intercept)	-0.138696	0.179308				id	258	Random Effects				(Intercept)	8.98901	1.3992				id	258	Random Effects
(Intercept)	-23.1628	7.45891				id	261	Random Effects				(Intercept)	0.605658	0.184833				id	261	Random Effects				(Intercept)	-3.30031	1.44206				id	261	Random Effects
(Intercept)	23.4587	7.70898				id	262	Random Effects				(Intercept)	-0.205534	0.190903				id	262	Random Effects				(Intercept)	2.58173	1.48911				id	262	Random Effects
(Intercept)	-22.8978	8.29521				id	263	Random Effects				(Intercept)	0.556559	0.205084				id	263	Random Effects				(Intercept)	2.55643	1.59891				id	263	Random Effects
(Intercept)	9.60264	7.23171				id	264	Random Effects				(Intercept)	-0.465331	0.179308				id	264	Random Effects				(Intercept)	0.229432	1.3992				id	264	Random Effects
(Intercept)	-3.50262	7.23171				id	265	Random Effects				(Intercept)	0.374405	0.179308				id	265	Random Effects				(Intercept)	-2.59463	1.3992				id	265	Random Effects
(Intercept)	16.0425	7.45891				id	266	Random Effects				(Intercept)	-0.308791	0.184833				id	266	Random Effects				(Intercept)	-2.59068	1.44206				id	266	Random Effects
(Intercept)	24.0089	7.23171				id	267	Random Effects				(Intercept)	-0.82838	0.179308				id	267	Random Effects				(Intercept)	2.86365	1.3992				id	267	Random Effects
(Intercept)	36.2697	7.45891				id	268	Random Effects				(Intercept)	-0.667847	0.184833				id	268	Random Effects				(Intercept)	2.52711	1.44206				id	268	Random Effects
(Intercept)	-7.09657	7.23171				id	311	Random Effects				(Intercept)	1.06071	0.179308				id	311	Random Effects				(Intercept)	-1.10178	1.3992				id	311	Random Effects
(Intercept)	16.0866	7.23171				id	312	Random Effects				(Intercept)	-0.693045	0.179308				id	312	Random Effects				(Intercept)	1.26271	1.3992				id	312	Random Effects
(Intercept)	14.3261	7.23171				id	313	Random Effects				(Intercept)	-0.196715	0.179308				id	313	Random Effects				(Intercept)	1.89735	1.3992				id	313	Random Effects
(Intercept)	14.4474	7.23171				id	314	Random Effects				(Intercept)	-0.671378	0.179308				id	314	Random Effects				(Intercept)	4.85418	1.3992				id	314	Random Effects
(Intercept)	-15.1858	7.23171				id	315	Random Effects				(Intercept)	0.692689	0.179308				id	315	Random Effects				(Intercept)	-6.12385	1.3992				id	315	Random Effects
(Intercept)	-19.266	7.23171				id	316	Random Effects				(Intercept)	-0.0858223	0.179308				id	316	Random Effects				(Intercept)	0.0280965	1.3992				id	316	Random Effects
(Intercept)	9.96084	7.23171				id	317	Random Effects				(Intercept)	-0.274074	0.179308				id	317	Random Effects				(Intercept)	1.42894	1.3992				id	317	Random Effects
(Intercept)	-13.2727	7.23171				id	318	Random Effects				(Intercept)	0.167635	0.179308				id	318	Random Effects				(Intercept)	-2.24564	1.3992				id	318	Random Effects
(Intercept)	-13.0879	7.23171				id	411	Random Effects				(Intercept)	0.390434	0.179308				id	411	Random Effects				(Intercept)	-3.34802	1.3992				id	411	Random Effects
(Intercept)	27.4236	7.23171				id	412	Random Effects				(Intercept)	-0.731964	0.179308				id	412	Random Effects				(Intercept)	-0.544229	1.3992				id	412	Random Effects
(Intercept)	-5.21594	7.45891				id	413	Random Effects				(Intercept)	0.830083	0.184833				id	413	Random Effects				(Intercept)	1.69948	1.44206				id	413	Random Effects
(Intercept)	13.9495	7.23171				id	414	Random Effects				(Intercept)	-0.0188306	0.179308				id	414	Random Effects				(Intercept)	6.23724	1.3992				id	414	Random Effects
(Intercept)	24.9631	7.23171				id	415	Random Effects				(Intercept)	-0.697807	0.179308				id	415	Random Effects				(Intercept)	6.77988	1.3992				id	415	Random Effects
(Intercept)	-6.50659	7.23171				id	416	Random Effects				(Intercept)	0.0742779	0.179308				id	416	Random Effects				(Intercept)	-5.05479	1.3992				id	416	Random Effects
(Intercept)	-4.40511	7.34267				id	417	Random Effects				(Intercept)	-0.260872	0.182008				id	417	Random Effects				(Intercept)	1.65623	1.42014				id	417	Random Effects
(Intercept)	-37.1207	7.23171				id	418	Random Effects				(Intercept)	0.414677	0.179308				id	418	Random Effects				(Intercept)	-7.42579	1.3992				id	418	Random Effects
(Intercept)	-37.3913	7.45891				id	551	Random Effects				(Intercept)	0.84058	0.184833				id	551	Random Effects				(Intercept)	-0.639067	1.44206				id	551	Random Effects
(Intercept)	-4.83281	7.34267				id	552	Random Effects				(Intercept)	-0.291436	0.182008				id	552	Random Effects				(Intercept)	0.902484	1.42014				id	552	Random Effects
(Intercept)	-18.1215	7.23171				id	553	Random Effects				(Intercept)	-0.0970434	0.179308				id	553	Random Effects				(Intercept)	-2.74591	1.3992				id	553	Random Effects
(Intercept)	9.58999	7.45891				id	554	Random Effects				(Intercept)	-0.288001	0.184833				id	554	Random Effects				(Intercept)	1.51418	1.44206				id	554	Random Effects
(Intercept)	40.6747	7.23171				id	555	Random Effects				(Intercept)	-0.623257	0.179308				id	555	Random Effects				(Intercept)	3.32147	1.3992				id	555	Random Effects
(Intercept)	20.7415	7.23171				id	561	Random Effects				(Intercept)	-0.576964	0.179308				id	561	Random Effects				(Intercept)	4.2256	1.3992				id	561	Random Effects
(Intercept)	34.622	7.23171				id	562	Random Effects				(Intercept)	-0.713615	0.179308				id	562	Random Effects				(Intercept)	10.5052	1.3992				id	562	Random Effects
(Intercept)	22.3249	7.23171				id	563	Random Effects				(Intercept)	-0.240875	0.179308				id	563	Random Effects				(Intercept)	3.08873	1.3992				id	563	Random Effects
(Intercept)	5.69342	7.23171				id	564	Random Effects				(Intercept)	-0.389773	0.179308				id	564	Random Effects				(Intercept)	0.833039	1.3992				id	564	Random Effects
(Intercept)	26.0409	7.45891				id	651	Random Effects				(Intercept)	-0.23101	0.184833				id	651	Random Effects				(Intercept)	1.40633	1.44206				id	651	Random Effects
(Intercept)	-12.6783	7.23171				id	652	Random Effects				(Intercept)	0.671537	0.179308				id	652	Random Effects				(Intercept)	-5.65506	1.3992				id	652	Random Effects
(Intercept)	-17.231	7.23171				id	653	Random Effects				(Intercept)	-0.391537	0.179308				id	653	Random Effects				(Intercept)	-4.16136	1.3992				id	653	Random Effects
(Intercept)	11.3091	7.45891				id	654	Random Effects				(Intercept)	0.0786358	0.184833				id	654	Random Effects				(Intercept)	5.97127	1.44206				id	654	Random Effects
(Intercept)	-7.01949	7.23171				id	655	Random Effects				(Intercept)	-0.1264	0.179308				id	655	Random Effects				(Intercept)	-5.16285	1.3992				id	655	Random Effects
(Intercept)	-3.30315	7.23171				id	661	Random Effects				(Intercept)	0.207814	0.179308				id	661	Random Effects				(Intercept)	-1.25315	1.3992				id	661	Random Effects
(Intercept)	13.1162	7.70898				id	662	Random Effects				(Intercept)	-0.214518	0.190903				id	662	Random Effects				(Intercept)	-2.02781	1.48911				id	662	Random Effects
(Intercept)	5.68442	7.23171				id	663	Random Effects				(Intercept)	0.293925	0.179308				id	663	Random Effects				(Intercept)	-2.2112	1.3992				id	663	Random Effects
(Intercept)	-23.2326	7.23171				id	664	Random Effects				(Intercept)	0.41902	0.179308				id	664	Random Effects				(Intercept)	0.339441	1.3992				id	664	Random Effects
nobs	2357							Model Summary				nobs	2357							Model Summary				nobs	2357							Model Summary
sigma	41.7542							Model Summary				sigma	1.04492							Model Summary				sigma	8.17763							Model Summary
logLik	-11775.7							Model Summary				logLik	-3520.08							Model Summary				logLik	-8120.95							Model Summary
AIC	23795.5							Model Summary				AIC	7284.17							Model Summary				AIC	16485.9							Model Summary
BIC	24498.8							Model Summary				BIC	7987.51							Model Summary				BIC	17189.3							Model Summary
REMLcrit	23551.5							Model Summary				REMLcrit	7040.17							Model Summary				REMLcrit	16241.9							Model Summary
df.residual	2235							Model Summary				df.residual	2235							Model Summary				df.residual	2235							Model Summary
