# Supplementary figures and images for: Sex-specific exploration accounts for differences in valence learning in male and female mice
Source: eLife journal article supplement (doi:10.7554/elife.108498), 2025-12-12

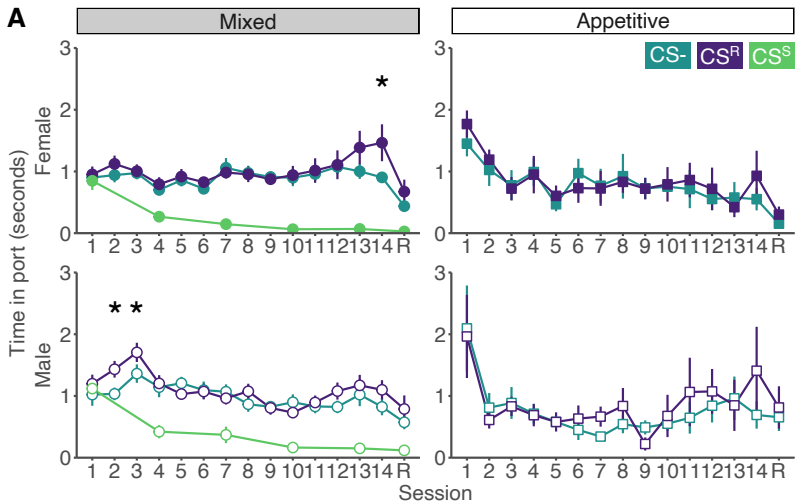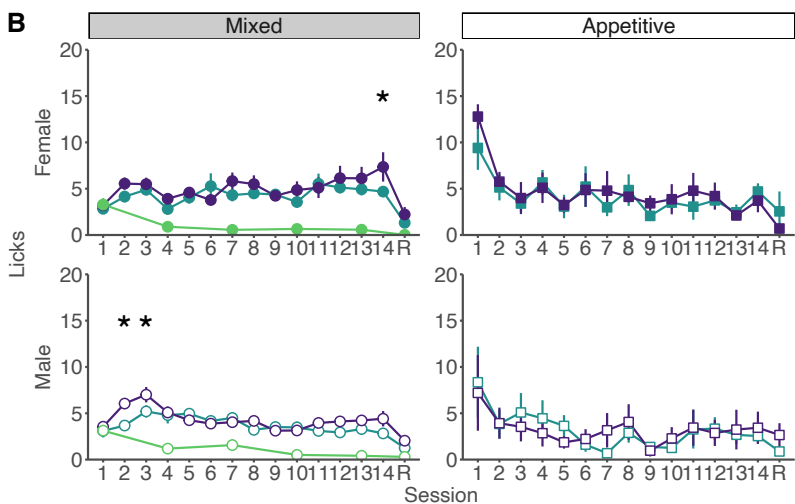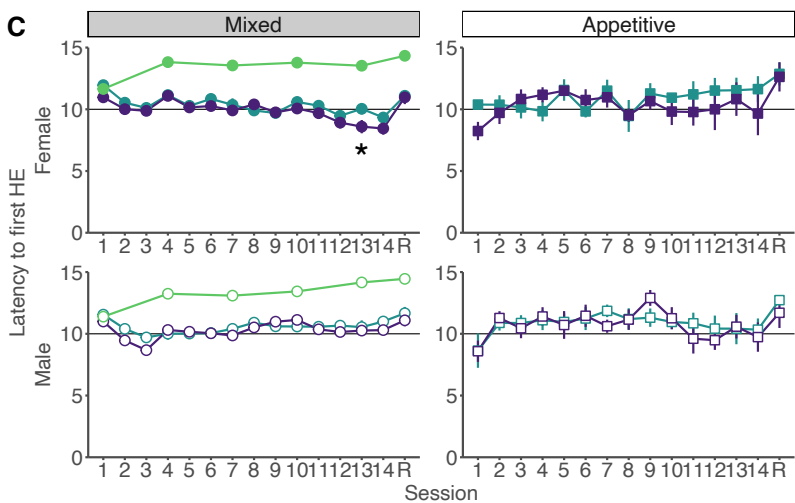

Supplement: supp [file elife_poa_e108498_Figure_1_figure_supplement_1.pdf › elife_poa_e108498_Figure_1_figure_supplement_1.pdf]

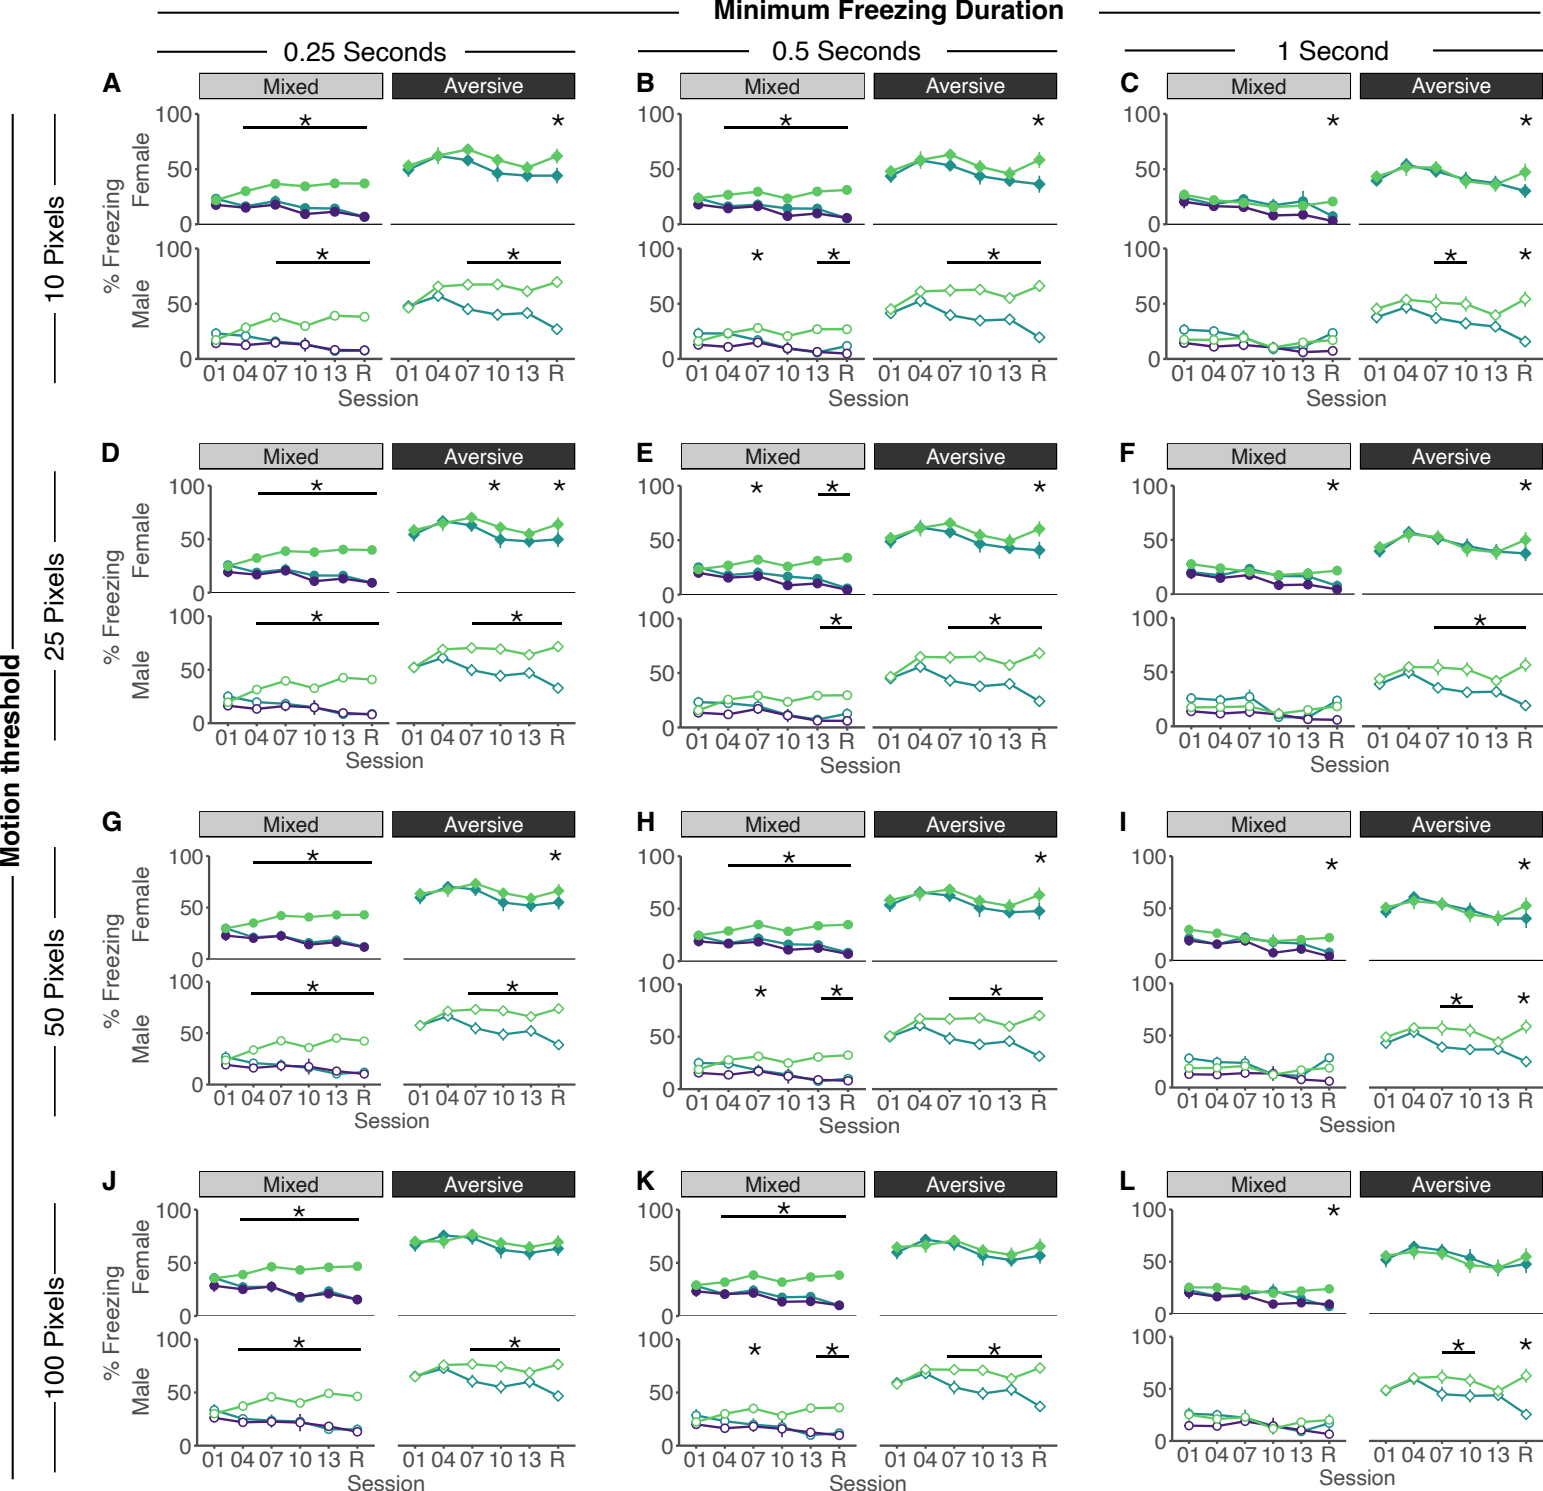

Supplement: supp [file elife_poa_e108498_Figure_1_figure_supplement_2.pdf › elife_poa_e108498_Figure_1_figure_supplement_2.pdf]

# Tracked Bodyparts

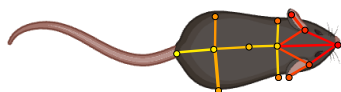

## Pause

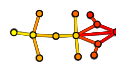

## Lick

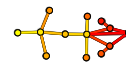

## Groom

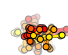

## Attend

1

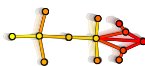

2

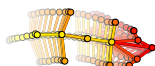

3

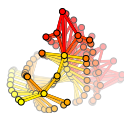

4

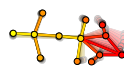

5

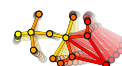

6

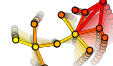

## Turn

1

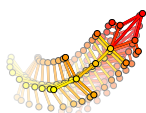

2

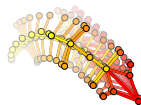

3

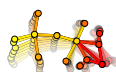

4

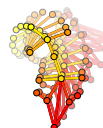

## Locomote

1

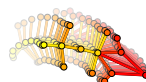

2

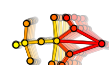

3

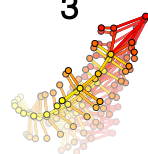

4

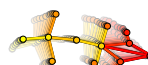

## Rear

1

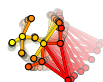

2

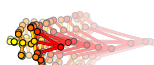

3

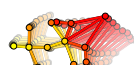

4

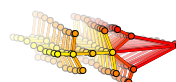

5

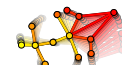

## Jump

1

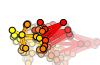

2

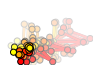

3

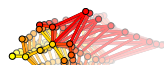

Supplement: supp [file elife_poa_e108498_Figure_2_figure_supplement_1.pdf › elife_poa_e108498_Figure_2_figure_supplement_1.pdf]

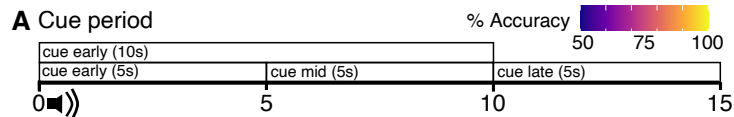

**B Threway Classification**

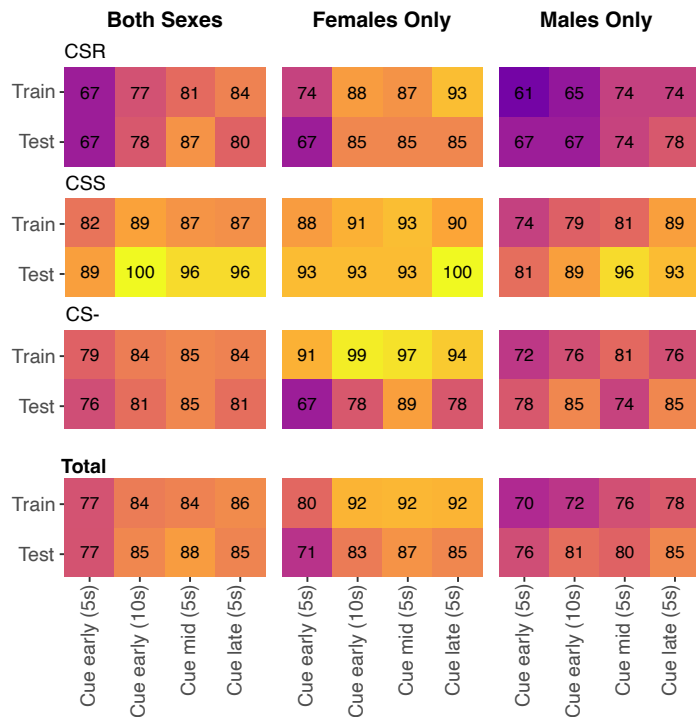

**C Pairwise Classification**

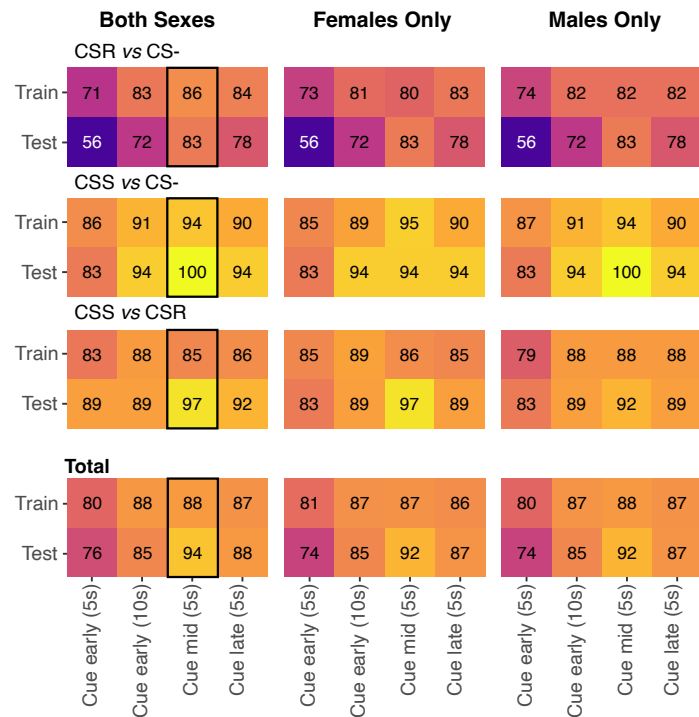

**D CSR vs CS-**

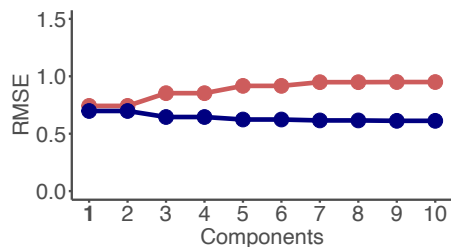

**CSS vs CS-**

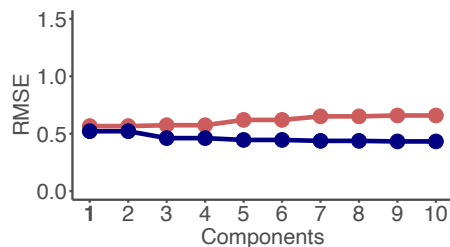

**CSS vs CSR**

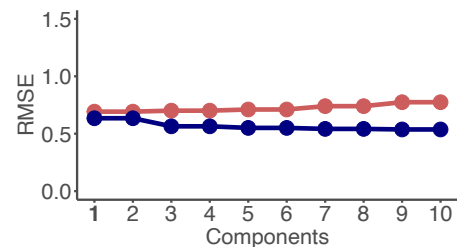

Supplement: supp [file elife_poa_e108498_Figure_2_figure_supplement_2.pdf › elife_poa_e108498_Figure_2_figure_supplement_2.pdf]

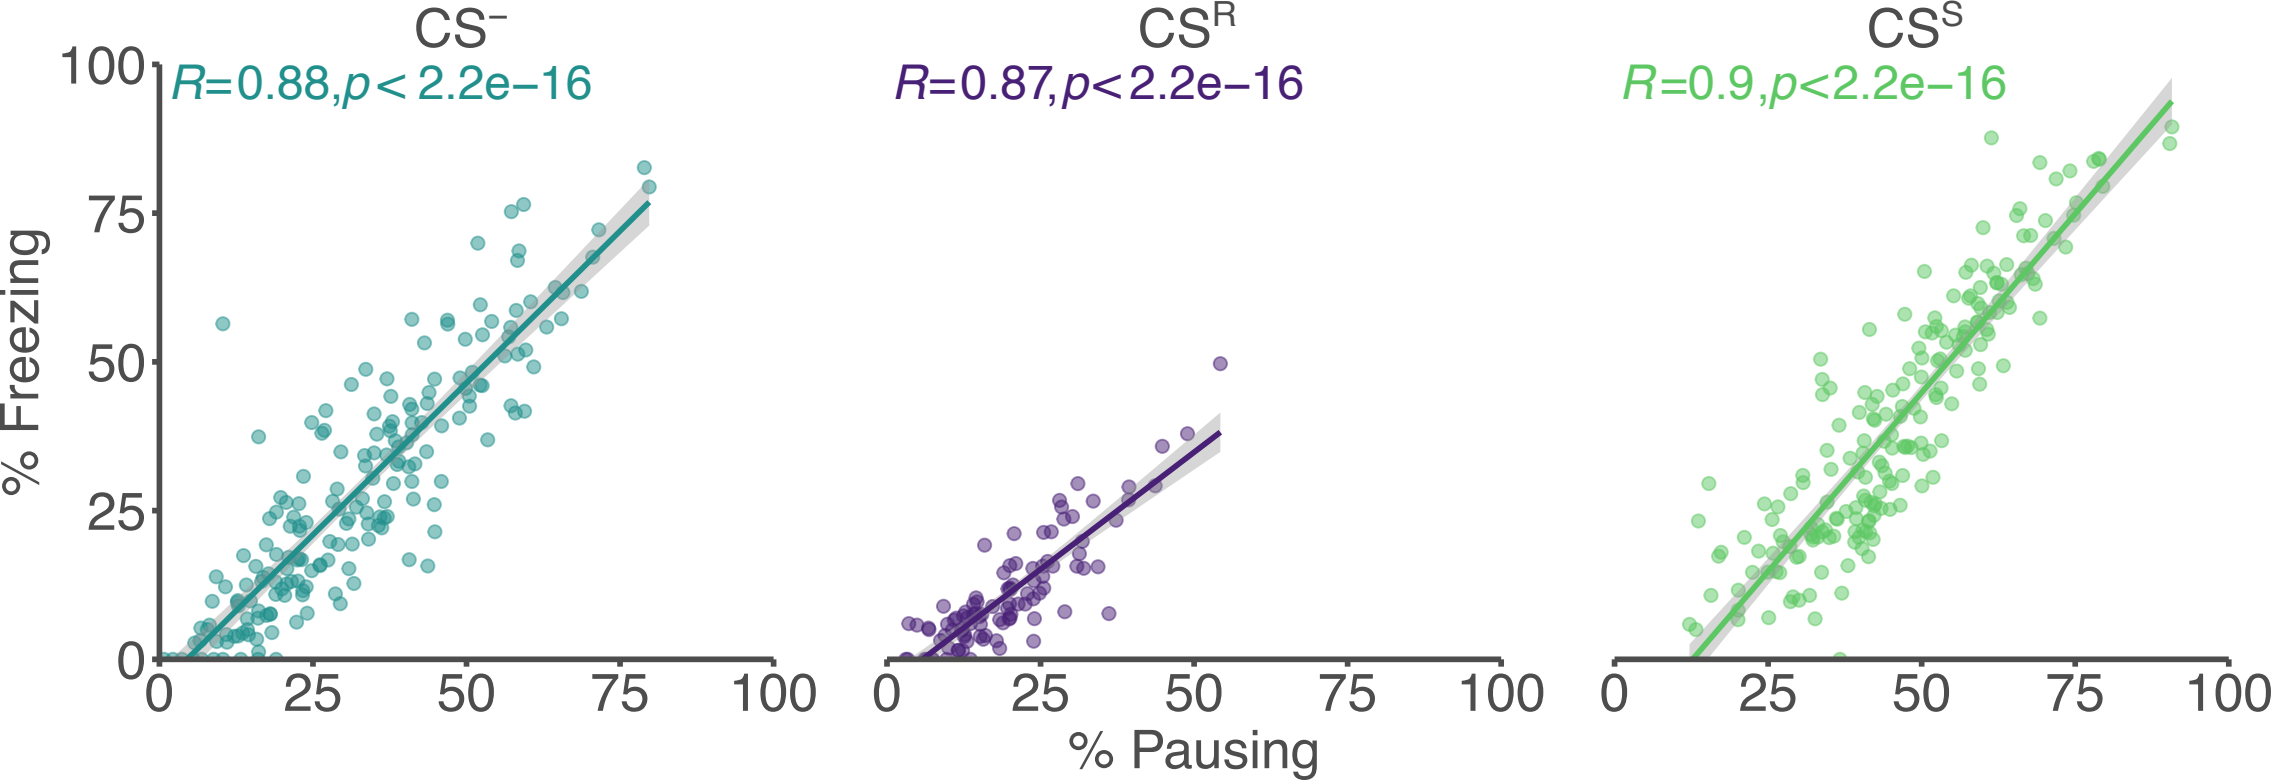

Supplement: supp [file elife_poa_e108498_Figure_2_figure_supplement_3.pdf › elife_poa_e108498_Figure_2_figure_supplement_3.pdf]

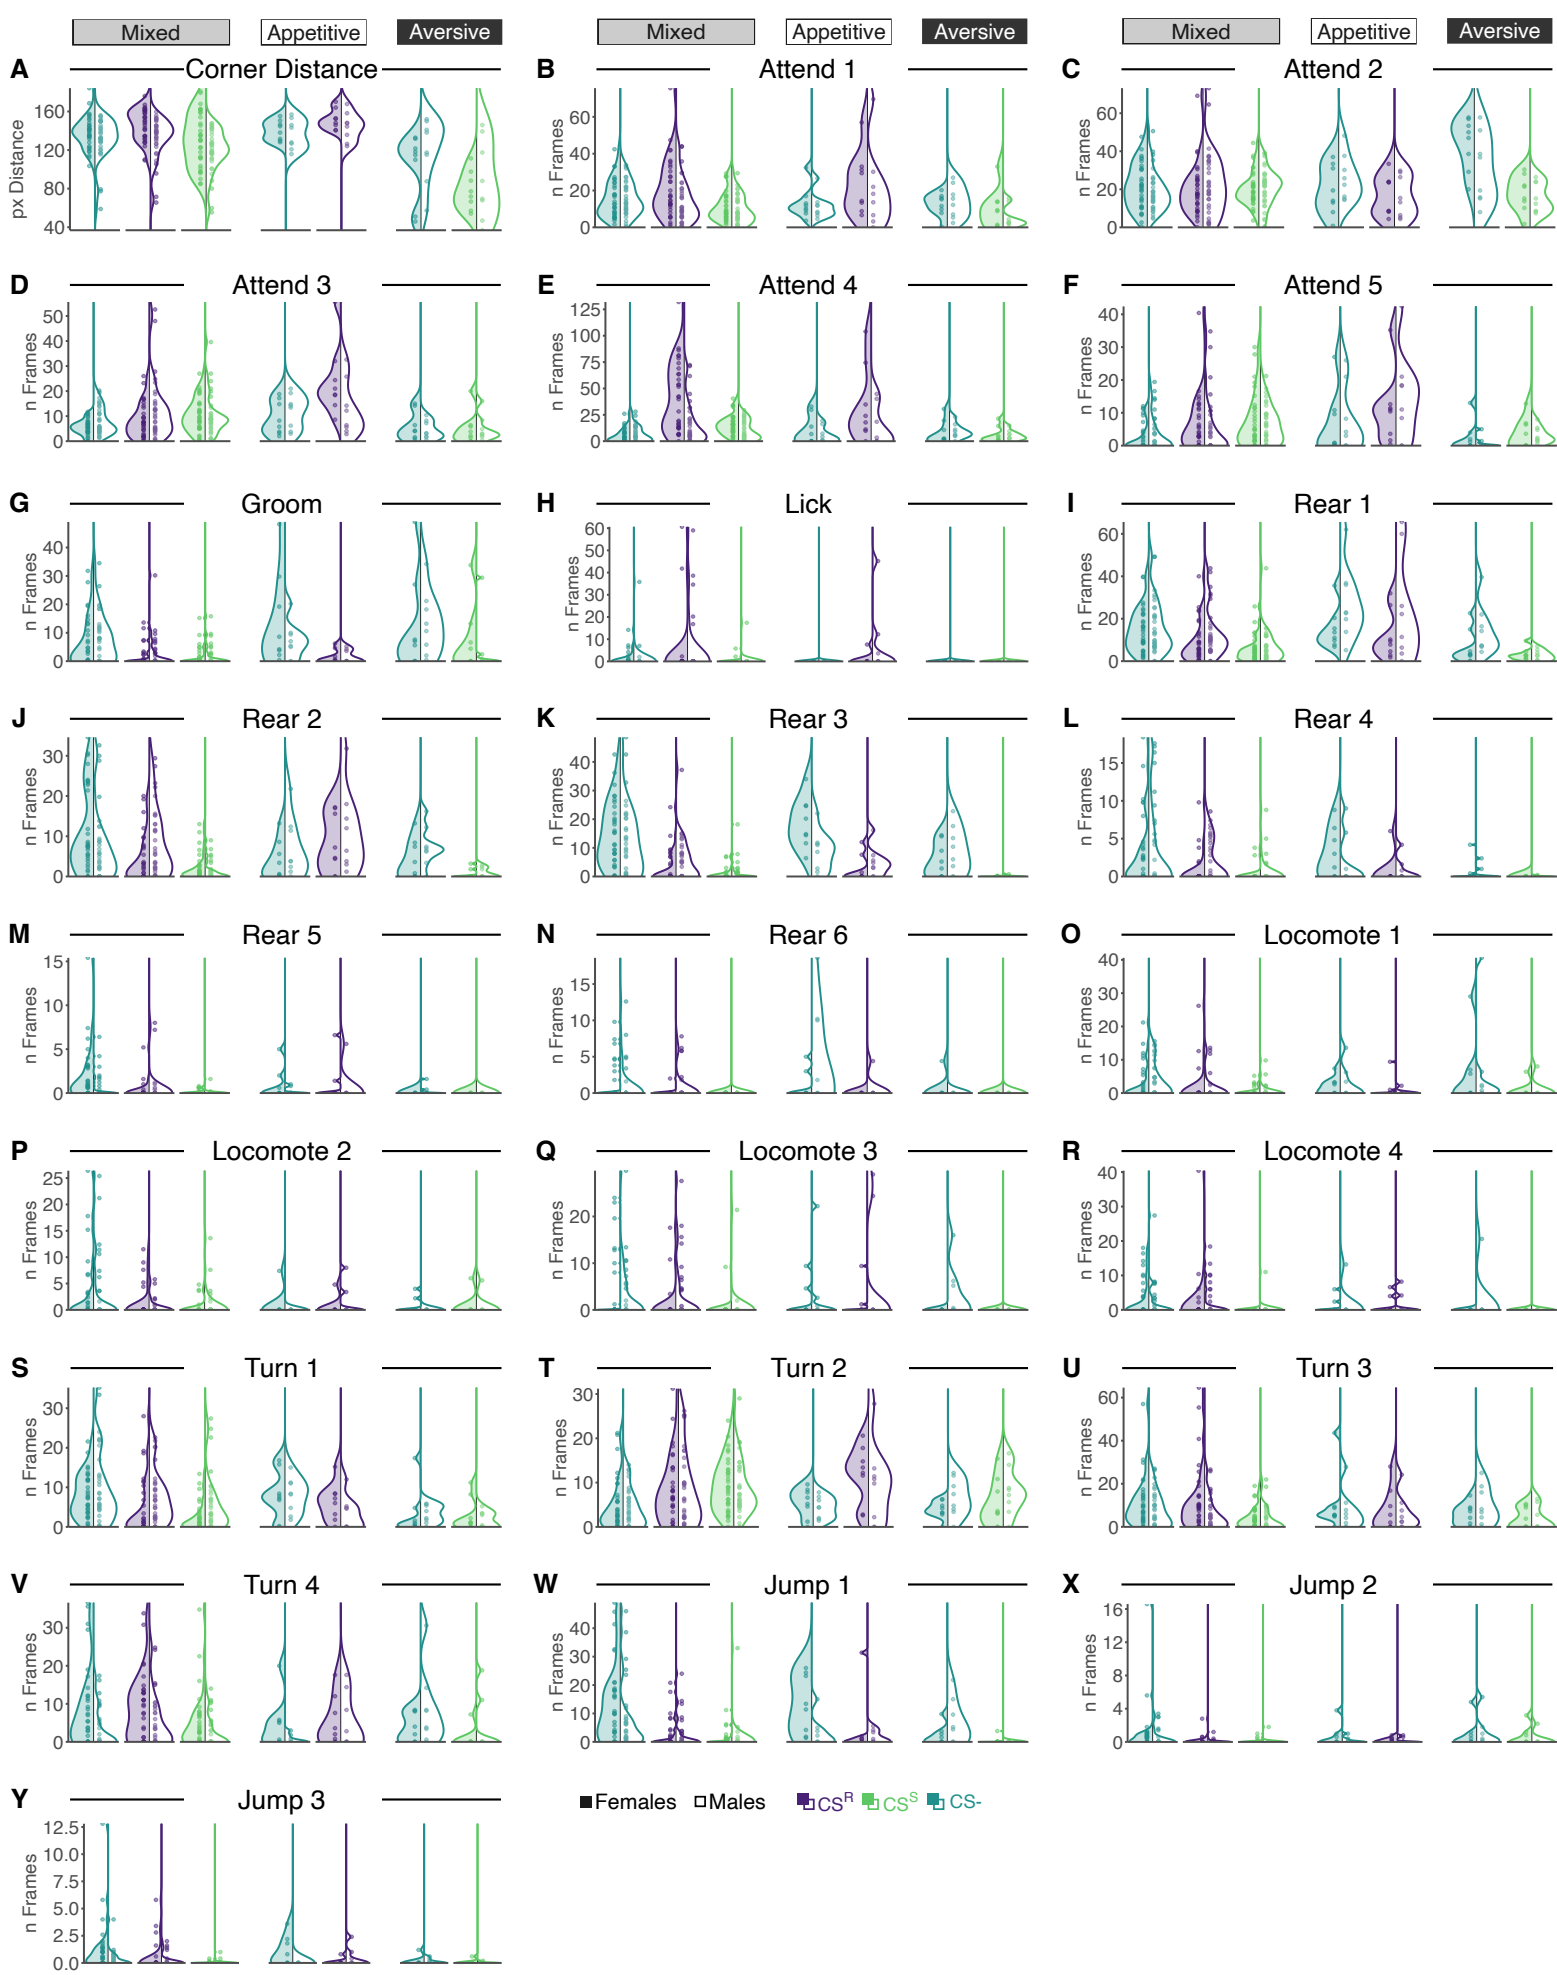

Supplement: supp [file elife_poa_e108498_Figure_2_figure_supplement_4.pdf › elife_poa_e108498_Figure_2_figure_supplement_4.pdf]

**A**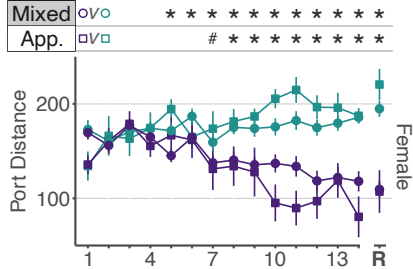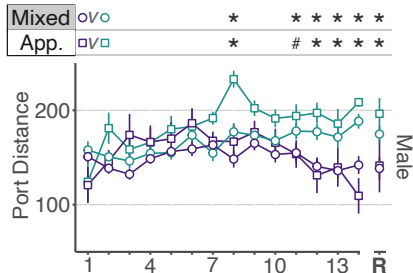**B**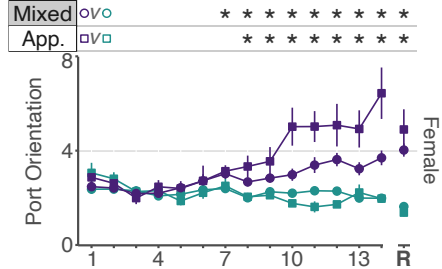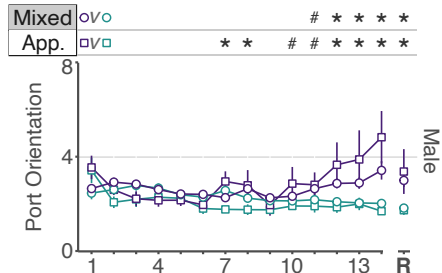**C**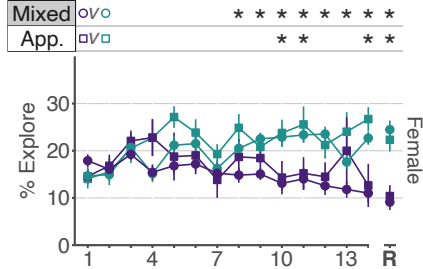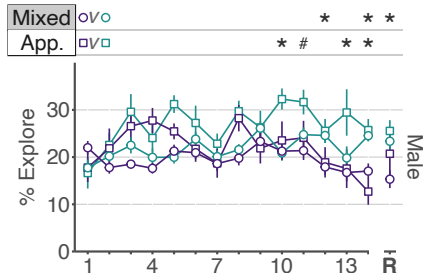

Supplement: supp [file elife_poa_e108498_Figure_3_figure_supplement_1.pdf › elife_poa_e108498_Figure_3_figure_supplement_1.pdf]
